# Supplementary material for: Synthesis and characterization of 2-(anthracene-9-yl)-4,5-diphenyl-1 H -imidazole derivatives as environmentally sensitive fluorophores
Source: Royal Society of Chemistry journal article supplement (doi:10.1039/d4ra03735a), 2024-01-01
Supplement: d4ra03735a1.pdf [file d4ra03735a1.pdf]

*Supporting Information for*

# **Synthesis and characterization of 2-(anthracene-9-yl)- 4,5-diphenyl-1*H*-imidazole derivatives as environmentally sensitive fluorophores**

Eyad A. Younes,<sup>\*a</sup> Amneh M. AL-Snaid,<sup>a</sup> Kayed A. Abu-Safieh,<sup>a</sup> Fatemeh Salami,<sup>b</sup> Nayyef Aljaar,<sup>a</sup> and Yuming Zhao<sup>b</sup>

<sup>a</sup>Department of Chemistry, Faculty of Science, The Hashemite University, P.O. Box 330127, Zarqa 13133, Jordan. E-mail: e.younes@hu.edu.jo; Tel: +962 (5) 3903333 ext. 4572

<sup>b</sup>Department of Chemistry, Memorial University of Newfoundland, St. John's, NL, Canada A1C 5S7. E-mail: yuming@mun.ca; Tel: +1 709 864 8747

## **Table of Content**

|                                                                                     |      |
|-------------------------------------------------------------------------------------|------|
| 1. Experimental Details                                                             | S-2  |
| 2. NMR Spectra of Compounds <b>3</b> , <b>5a-d</b> , and <b>6</b>                   | S-7  |
| 3. <sup>1</sup> H NMR Titration Result of <b>3</b> with TBAF                        | S-15 |
| 4. High-Resolution Mass Spectra for Compounds <b>3</b> , <b>5a-d</b> , and <b>6</b> | S-16 |
| 5. DFT Calculations of Compound <b>3</b>                                            | S-21 |
| 6. Crystallographic Data and Detailed Refinements                                   | S-23 |

## 1. Experimental Details

### 1.1 Materials and instrumentation

All chemicals, solvents and reagents were obtained of standard quality from commercial suppliers (Sigma Aldrich, Fluka, Acros, and Tedia) and were used as received without any further purification. All reactions were conducted in standard, dry glassware and under an inert atmosphere of nitrogen unless otherwise noted. Melting points (m.p.) were determined using a Stuart Scientific (Britain) melting point apparatus with samples placed in one-end open glass capillaries. Thin-layer chromatography (TLC) was performed with silica gel F254 covered on aluminum sheets and visualized by UV light.  $^1\text{H}$  and  $^{13}\text{C}$  NMR spectra were recorded at room temperature on a Bruker III 400 MHz ADVANCE spectrometer. Chemical shifts ( $\delta$ ) are reported in ppm downfield relative to the signal of an internal reference ( $\text{SiMe}_4$ ). Coupling constants ( $J$ ) are given in Hz. Fourier transform infrared (FTIR) spectra were recorded on a Bruker vertex 70 instrument. High-resolution APPI-TOF MS analysis was conducted on a Micromass GCT Premier instrument.

UV-Vis absorption spectra were recorded on a Cary 100 bio spectrophotometer. Solution-phase fluorescence spectra were measured using a Photon Technology International (PTI) QuantaMaster spectrofluorometer. Relative fluorescence quantum yields ( $\Phi_f$ ) were determined by the following equation:

$$\Phi_f = \Phi_s \times \frac{I_s}{I_r} \times \frac{A_r}{A_s} \times \frac{n_s^2}{n_r^2}$$

where  $\Phi_f$  is the fluorescence quantum yield,  $I$  is the integrated area under the emission profile,  $A$  is the absorbance at a particular excitation wavelength,  $n$  is the refractive index of the medium. The subscripts s and r denote sample and reference, respectively. Quinine sulfate ( $\Phi_f = 0.546$ ) was used as the reference.

Single-crystal XRD data was collected at 100 (2) K on a XtaLAB Synergy-S, Dualflex, HyPix-6000HE diffractometer using  $\text{Cu K}\alpha$  radiation ( $\lambda = 1.5406 \text{ \AA}$ ). The crystal was mounted on nylon CryoLoops with Paraton-N. Data collection and reduction were processed within CrysAlisPro (Rigaku OD, 2020). A multi-scan absorption correction was applied to the collected

reflections. Using the Olex2<sup>1</sup> software package, structures were solved with the ShelXT<sup>2</sup> and ShelXL<sup>3</sup> programs.

## 1.2 Synthesis

### 2-(Anthracene-9-yl)-4,5-bis(4-bromophenyl)-1H-imidazole (**3**)

In sealed tube a mixture of 4,4-dibromobenzil (0.15 g, 0.40 mmol), 9-anthracene carboxaldehyde (0.11 g, 0.52 mmol), ammonium acetate (0.50 g, 6.0 mmol), and acetic acid (4.0 mL) was heated at 120 °C. The mixture was stirred for 12 h. The reaction mixture was then poured into 100 mL of water. The resulting yellow precipitate was filtered and recrystallized from hot chloroform to offer compound **3** as a yellow crystal (0.19 g, 0.34 mmol, 86% yield). m. p = 164–166 °C. <sup>1</sup>H NMR (400 MHz, DMSO-*d*<sub>6</sub>): δ 13.11 (s, 1H), 8.91 – 8.68 (m, 1H), 8.21 (d, *J* = 5.8 Hz, 2H), 7.94 (d, *J* = 5.9 Hz, 2H), 7.76–7.45 (m, 12H). <sup>13</sup>C NMR (100 MHz, DMSO-*d*<sub>6</sub>): δ 144.34, 136.72, 134.85, 132.31, 131.86, 131.31, 131.25, 130.46, 129.80, 128.93, 127.51, 127.21, 126.38, 126.09, 121.37, 120.26. FTIR (KBr): 3387, 3048, 1493 cm<sup>-1</sup>. HRMS (LC-TOF, positive mode) *m/z* calcd for C<sub>29</sub>H<sub>19</sub>Br<sub>2</sub>N<sub>2</sub> 554.9895; found [M + H]<sup>+</sup> 554.9893.

### General synthetic procedure for π-ADPIs **5a–d**

A mixture of **3** (0.20 g, 0.30 mmol), areneboronic acid (**4a–d**), Pd(PPh<sub>3</sub>)<sub>4</sub> (0.015 g, 0.013 mmol) and cesium carbonate (0.35 g, 1.1 mmol) in THF/H<sub>2</sub>O (1:1, 30 mL) were bubbled with nitrogen gas for 10 min. The reaction mixture was heated at 70 °C under nitrogen protection and stirring for 6 h. The reaction was cooled down to room temperature. After evaporation of the THF, the product was extracted with chloroform (2 × 10 mL). The organic layer was removed under vacuum and the crude product was purified with silica gel chromatography using ethyl acetate and *n*-hexane (1:3, v/v) as eluent.<sup>4</sup>

### 2-(Anthracen-9-yl)-4,5-bis(4'-methoxy-[1,1'-biphenyl]-4-yl)-1H-imidazole (**5a**)

Compound **5a** was synthesized reacting **3** (0.20 g, 0.30 mmol) with 4-methoxyphenylboronic acid (**4a**, 0.164 g, 1.08 mmol), following the general procedure described above. Compound **5a** was obtained as a yellow powder (0.11 g, 0.18 mmol, 60% yield). m.p. = 170–172 °C. <sup>1</sup>H NMR (400 MHz, DMSO-*d*<sub>6</sub>): δ 12.98 (s, 1H), 8.81 (s, 1H), 8.21 (dd, *J* = 7.3, 2.4 Hz, 2H), 8.06–7.92 (m, 2H), 7.79 (d, *J* = 8.4 Hz, 2H), 7.76–7.63 (m, 10H), 7.63–7.55 (m, 4H), 7.04 (dd, *J* = 8.8, 7.0 Hz, 4H), 3.81 (d, *J* = 3.5 Hz, 6H). <sup>13</sup>C NMR (100 MHz, DMSO-*d*<sub>6</sub>): δ 159.54,

159.32, 143.89, 139.19, 138.28, 137.30, 134.44, 132.66, 132.21, 131.40, 131.33, 129.96, 128.89, 128.74, 128.30, 128.07, 127.93, 127.07, 126.75, 126.54, 126.41, 126.05, 114.92, 114.86, 55.67, 55.65. FTIR (KBr): 3375, 3032, 1501, 1246  $\text{cm}^{-1}$ . HRMS (LC-TOF, positive mode)  $m/z$  calcd for  $\text{C}_{43}\text{H}_{33}\text{N}_2\text{O}_2$  609.2542; found  $[\text{M} + \text{H}]^+$  609.2561.

### **2-(Anthracen-9-yl)-4,5-bis(4-(benzo[*b*]thiophen-3-yl) phenyl)-1*H*-imidazole (5b)**

Compound **5b** was synthesized by reacting **3** (0.20 g, 0.30 mmol) with benzo[*b*]thiophene-3-ylboronic acid (**4b**, 0.196 g, 1.10 mmol), following the general procedure described above. Compound **5b** was obtained as a yellow-green powder (0.15 g, 0.23 mmol, 76% yield). m.p. = 163-165 °C.  $^1\text{H}$  NMR (400 MHz,  $\text{DMSO-}d_6$ ):  $\delta$  13.13 (s, 1H), 8.83 (s, 1H), 8.23 (dd,  $J = 6.6, 3.0$  Hz, 2H), 8.10 (t,  $J = 6.3$  Hz, 2H), 8.06 – 7.96 (m, 4H), 7.93 (d,  $J = 7.4$  Hz, 3H), 7.89 – 7.81 (m, 3H), 7.75 (d,  $J = 8.1$  Hz, 2H), 7.67 (d,  $J = 8.1$  Hz, 2H), 7.61 (dd,  $J = 6.7, 3.1$  Hz, 4H), 7.46 (h,  $J = 7.1, 6.6$  Hz, 4H).  $^{13}\text{C}$  NMR (101 MHz,  $\text{DMSO}$ )  $\delta$  144.14, 140.68, 137.65, 137.52, 137.38, 137.34, 136.93, 135.25, 134.95, 133.99, 131.39, 131.33, 130.80, 129.17, 128.93, 128.86, 128.82, 128.27, 128.17, 127.17, 126.53, 126.38, 126.11, 125.48, 125.25, 125.17, 125.12, 125.05, 124.93, 123.82, 123.77, 123.03, 122.93. FTIR (KBr): 3368, 3032, 1534  $\text{cm}^{-1}$ . HRMS (LC-TOF, positive mode)  $m/z$  calcd for  $\text{C}_{45}\text{H}_{29}\text{N}_2\text{S}_2$  661.1772; found  $[\text{M} + \text{H}]^+$  661.1768.

### **4',4''-(2-(Anthracen-9-yl)-1*H*-imidazole-4,5-diyl)bis(*N,N*-diphenyl-[1,1'-biphenyl]-4-amine) (5c)**

Compound **5c** was synthesized by reacting **3** (0.20 g, 0.30 mmol) with 4-(diphenylamino)phenylboronic acid (**4c**, 0.313 g, 1.08 mmol), following the general procedure described above. Compound **5c** was obtained as a yellow-green powder (0.16 g, 0.18 mmol, 61% yield). m.p. = 157-159 °C.  $^1\text{H}$  NMR (400 MHz,  $\text{DMSO-}d_6$ ):  $\delta$  13.03 (s, 1H), 8.81 (s, 1H), 8.26 – 8.15 (m, 2H), 8.05 – 7.90 (m, 2H), 7.84 – 7.61 (m, 12H), 7.62 – 7.53 (m, 4H), 7.33 (t,  $J = 7.5$  Hz, 8H), 7.16 – 6.89 (m, 16H).  $^{13}\text{C}$  NMR (101 MHz,  $\text{DMSO}$ )  $\delta$  147.53, 147.48, 147.34, 147.07, 143.96, 138.95, 138.02, 137.29, 134.61, 134.23, 133.65, 131.37, 131.30, 130.08, 128.90, 128.30, 128.08, 127.93, 127.83, 127.12, 126.79, 126.53, 126.45, 126.08, 124.67, 124.57, 123.91, 123.78, 123.70, 123.67. FTIR (KBr): 3368, 3053, 1589  $\text{cm}^{-1}$ . HRMS (LC-TOF, positive mode)  $m/z$  calcd for  $\text{C}_{65}\text{H}_{46}\text{N}_4$  882.3722; found  $[\text{M}]^+$  882.3723.

**9,9'-((2-(anthracen-9-yl)-1H-imidazole-4,5-diyl)bis([1,1'-biphenyl]-4',4-diyl))bis(9H-carbazole) (5d)**

Compound **5d** was synthesized by reacting **3** (0.20 g, 0.30 mmol) with 4-(9-carbazolyl)benzene boronic acid (0.31 g, 1.079 mmol), following the general procedure described above. Compound **5d** was obtained as a yellow powder (0.16 g, 0.18 mmol, 62% yield). m.p. = 240-242 °C. <sup>1</sup>H NMR (400 MHz, DMSO-*d*<sub>6</sub>): δ 13.12 (s, 1H), 8.84 (s, 1H), 8.26 (dd, *J* = 13.8, 7.2 Hz, 6H), 8.06 (m, 6H), 8.01–7.82 (m, 8H), 7.75 (t, *J* = 8.8 Hz, 4H), 7.67–7.58 (m, 4H), 7.48 (d, *J* = 3.3 Hz, 8H), 7.36–7.26 (m, 4H). <sup>13</sup>C NMR (100 MHz, DMSO-*d*<sub>6</sub>): δ 144.22, 140.62, 139.42, 138.98, 138.68, 137.75, 137.41, 136.82, 136.54, 135.48, 131.42, 131.34, 131.00, 129.12, 128.93, 128.68, 128.53, 127.61, 127.53, 127.16, 126.78, 126.41, 126.09, 123.30, 121.04, 120.63, 120.59, 110.18. FTIR (KBr): 3042, 2956, 1601, 1504 cm<sup>-1</sup>. HRMS (LC-TOF, positive mode) *m/z* calcd for C<sub>65</sub>H<sub>43</sub>N<sub>4</sub> 879.3488; found [M + H]<sup>+</sup> 879.3479.

**2-(Anthracen-9-yl)-4,5-bis(4-bromophenyl)-1-methyl-1H-imidazole (6)**

Compound **6** was prepared according to the literature procedure<sup>5</sup> with modifications. To a dried two-neck round-bottomed flask were added **3** (0.15 g, 0.27 mmol), anhydrous THF (15 mL), and NaH (0.01 g, 0.4 mmol). The resulting mixture was refluxed under a nitrogen for 1 h. To this mixture, iodomethane (0.044 g, 0.30 mmol) was added and refluxed for another 3 h. The reaction was then quenched by adding water (15 mL) and extracted with dichloromethane (30 mL). The organic layer was washed with a saturated Na<sub>2</sub>SO<sub>3</sub> solution (180 mL). The separated organic layer was dried using magnesium sulfate. After removing the solvent, the crude product was purified using silica gel chromatography column to yielded **6** (0.067 g, 0.12 mmol, 44% yield) as a yellow solid. <sup>1</sup>H NMR (400 MHz, DMSO-*d*<sub>6</sub>): δ: 8.87 (s, 1H), 8.23 (d, *J* = 7.1 Hz, 2H), 7.79 (d, *J* = 8.3 Hz, 2H), 7.69 (d, *J* = 9.1 Hz, 2H), 7.64–7.55 (m, 6H), 7.54 – 7.41 (m, 4H), 3.02 (s, 3H). <sup>13</sup>C NMR (100 MHz, DMSO-*d*<sub>6</sub>): δ 145.06, 136.35, 134.37, 133.43, 132.73, 131.73, 131.62, 131.26, 130.21, 129.53, 129.27, 129.17, 128.63, 127.69, 126.19, 125.91, 124.73, 122.98, 119.84, 32.21. FTIR (KBr): 3050, 3002, 2947, 1590, 1544, 1420 cm<sup>-1</sup>. HRMS (LC-TOF, positive mode) *m/z* calcd for C<sub>30</sub>H<sub>21</sub>Br<sub>2</sub>N<sub>2</sub> 569.0051; found [M + H]<sup>+</sup> 569.0034.

**References:**

1. O. Dolomanov, L. Bourhis, R. Gildea and J. Howard, *J. Appl. Crystallogr.*, 2009, **42**, 339–341.

2. G. M. Sheldrick, *Acta Crystallogr. A*, 2015, **71**, 3–8.
3. G. M. Sheldrick, *Acta Crystallogr. C*, 2015, **71**, 3–8.
4. E. A. Younes, Y. J. Hammad, F. Salami, A. J. Rasras, R. A. Al-Qawasmeh and Y. Zhao, *RSC Adv.*, 2024, **14**, 5331–5339.
5. M. Toba, T. Nakashima and T. Kawai, *J. Polym. Sci. A: Polym. Chem.*, 2011, **49**, 1895–1906.

## 2. NMR Spectra of Compounds **3**, **5a-d**, and **6**

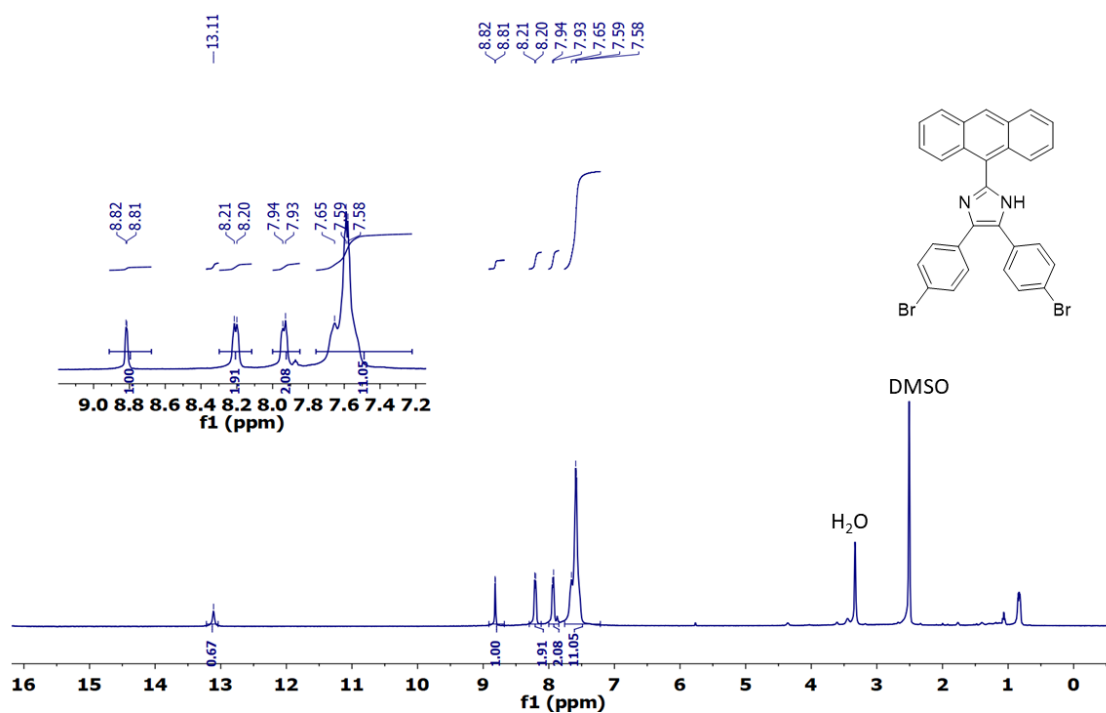

Fig. S-1  $^1\text{H}$  NMR (400 MHz,  $\text{DMSO-}d_6$ ) spectrum of compound **3**.

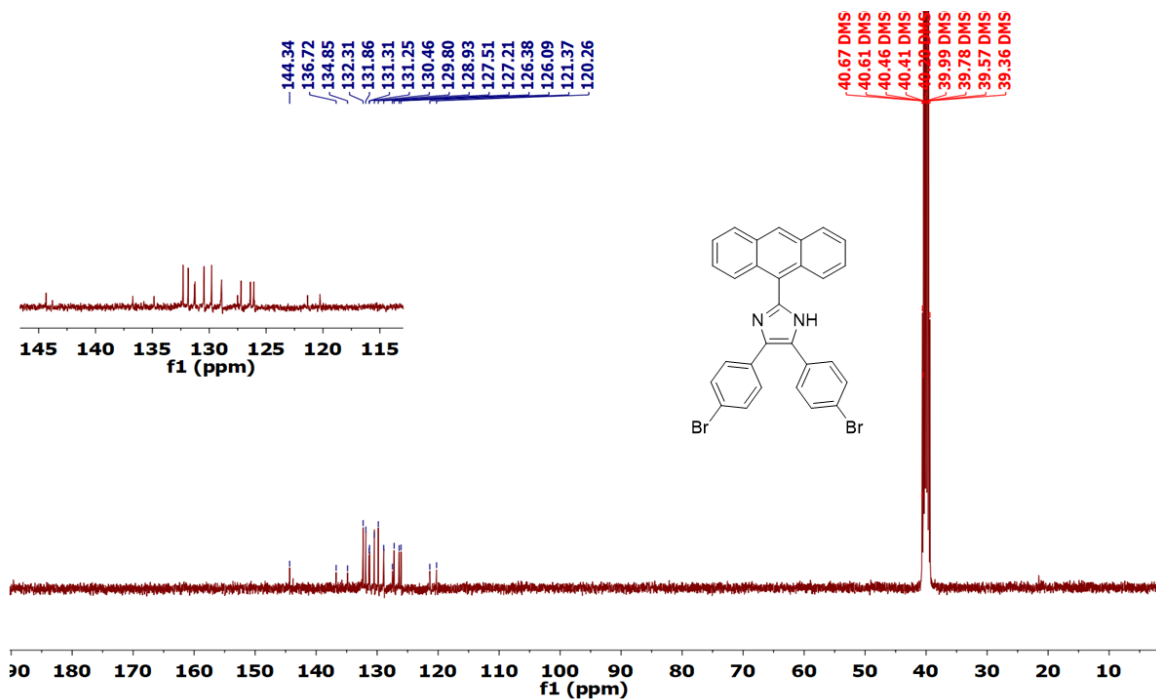

Fig. S-2  $^{13}\text{C}$  NMR (100 MHz, DMSO- $d_6$ ) spectrum of compound **3**.

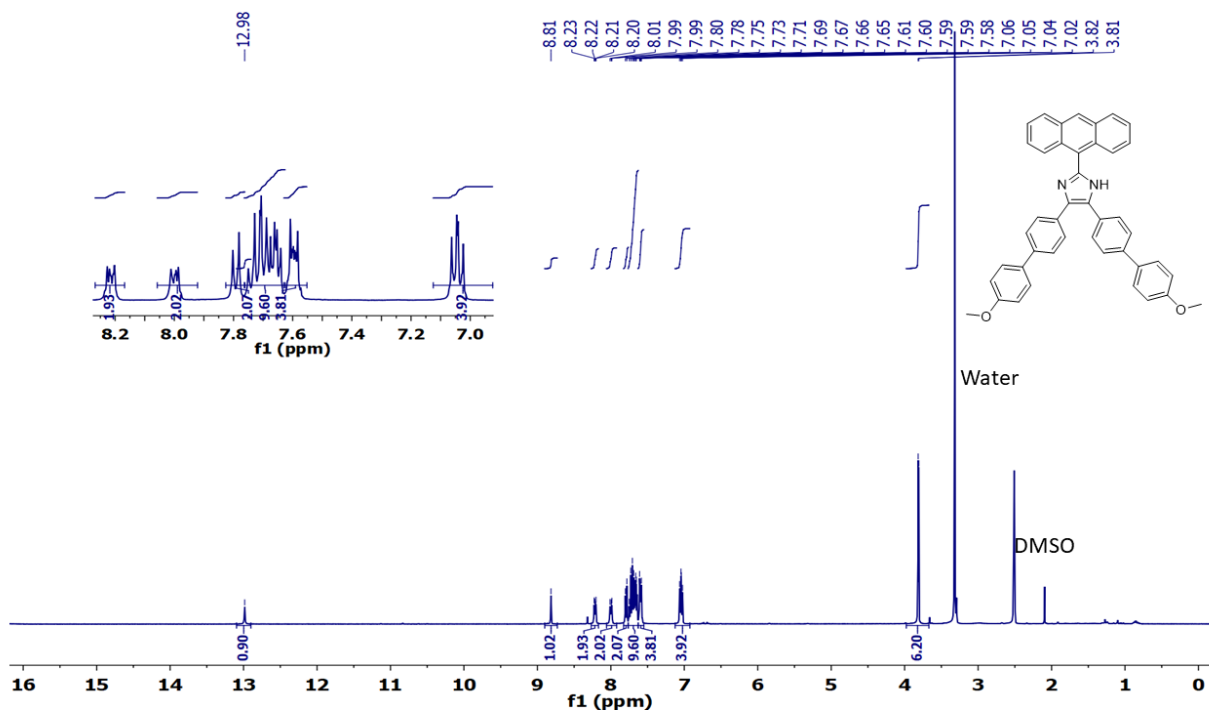

Fig. S-3  $^1\text{H}$  NMR (400 MHz, DMSO- $d_6$ ) spectrum of compound **5a**.



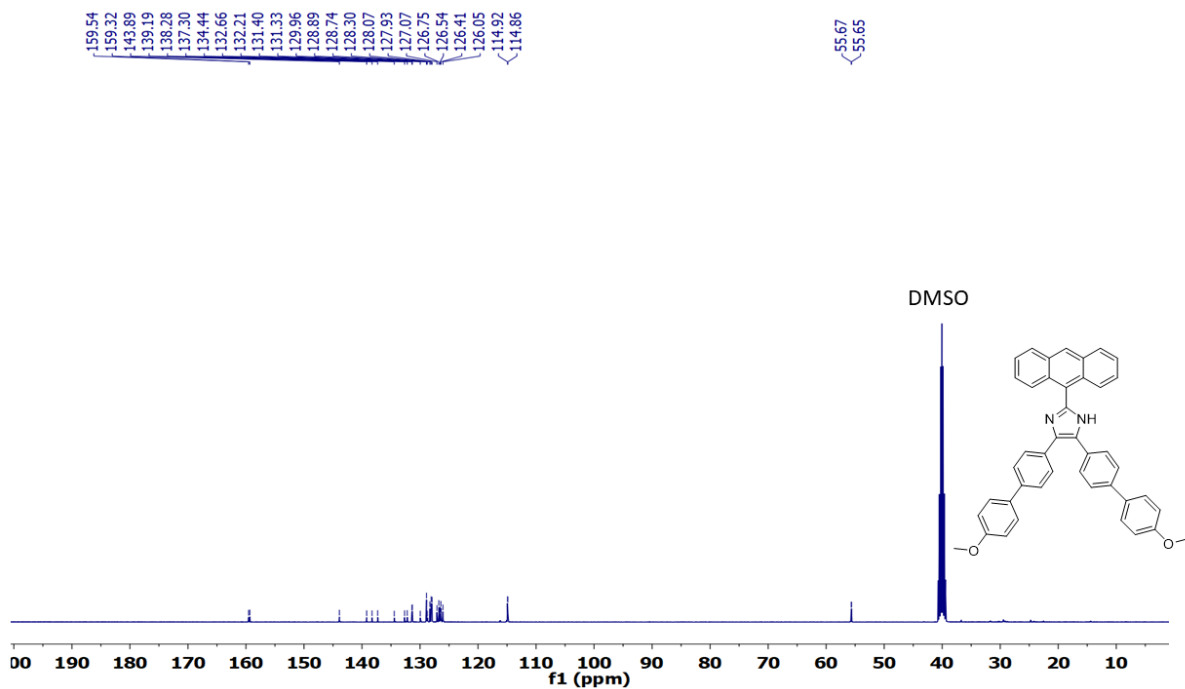

Fig. S-4  $^{13}\text{C}$  NMR (100 MHz,  $\text{DMSO-}d_6$ ) spectrum of compound **5a**.

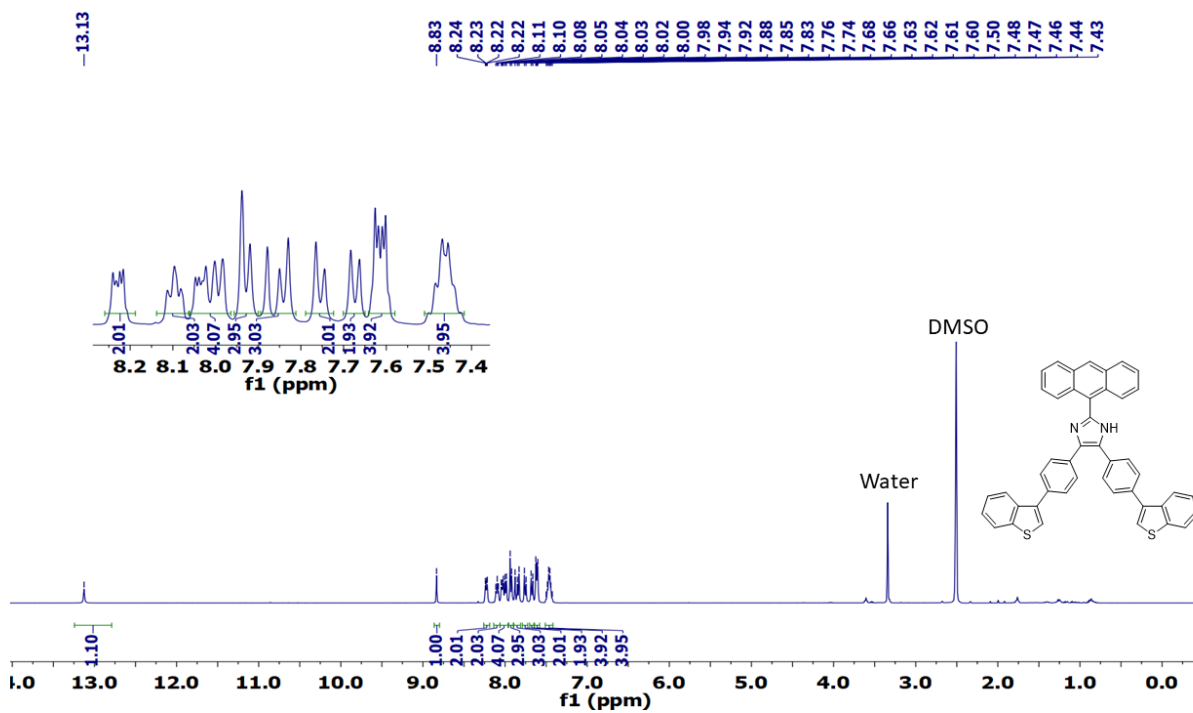

Fig. S-5  $^1\text{H}$  NMR (400 MHz,  $\text{DMSO-}d_6$ ) spectrum of compound **5b**.

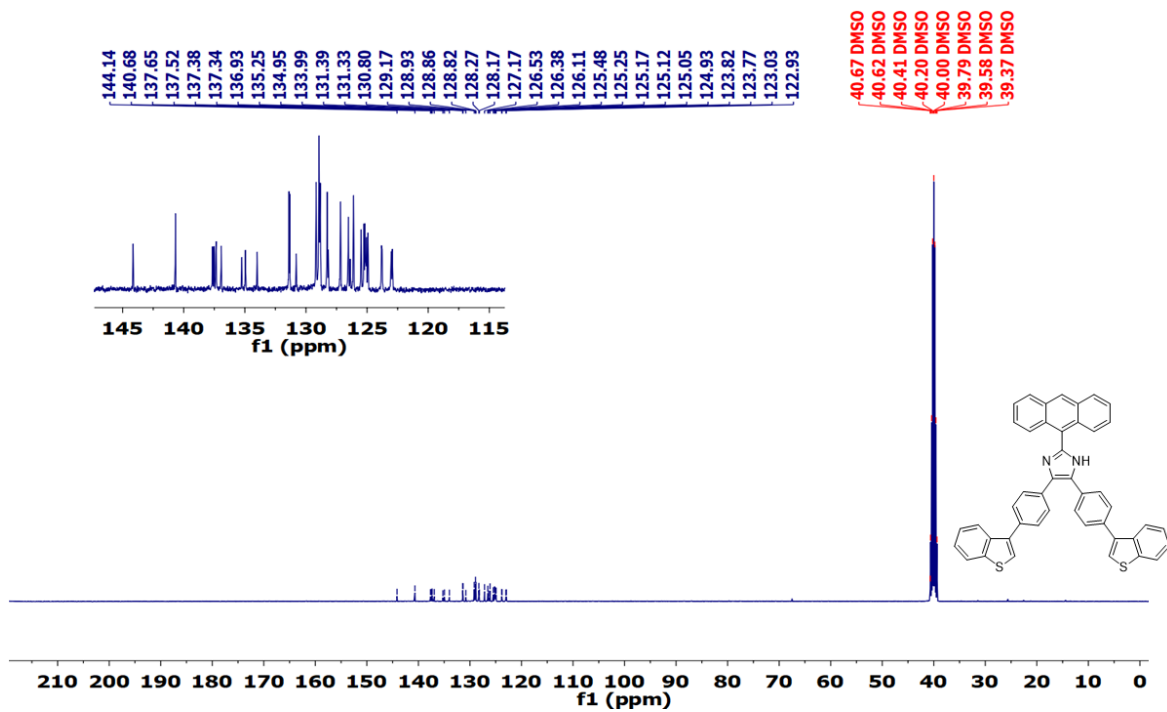

**Fig. S-6**  $^{13}\text{C}$  NMR (100 MHz,  $\text{DMSO-}d_6$ ) spectrum of compound **5b**.

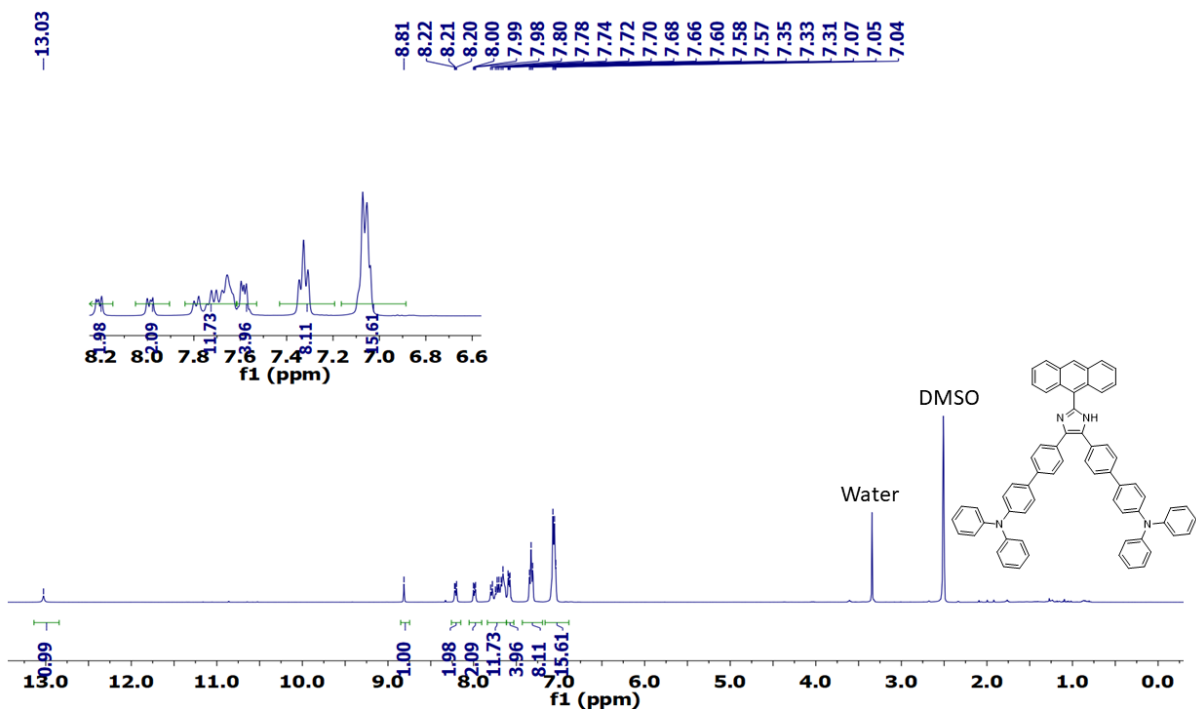

Fig. S-7  $^1\text{H}$  NMR (400 MHz,  $\text{DMSO-}d_6$ ) spectrum of compound **5c**.

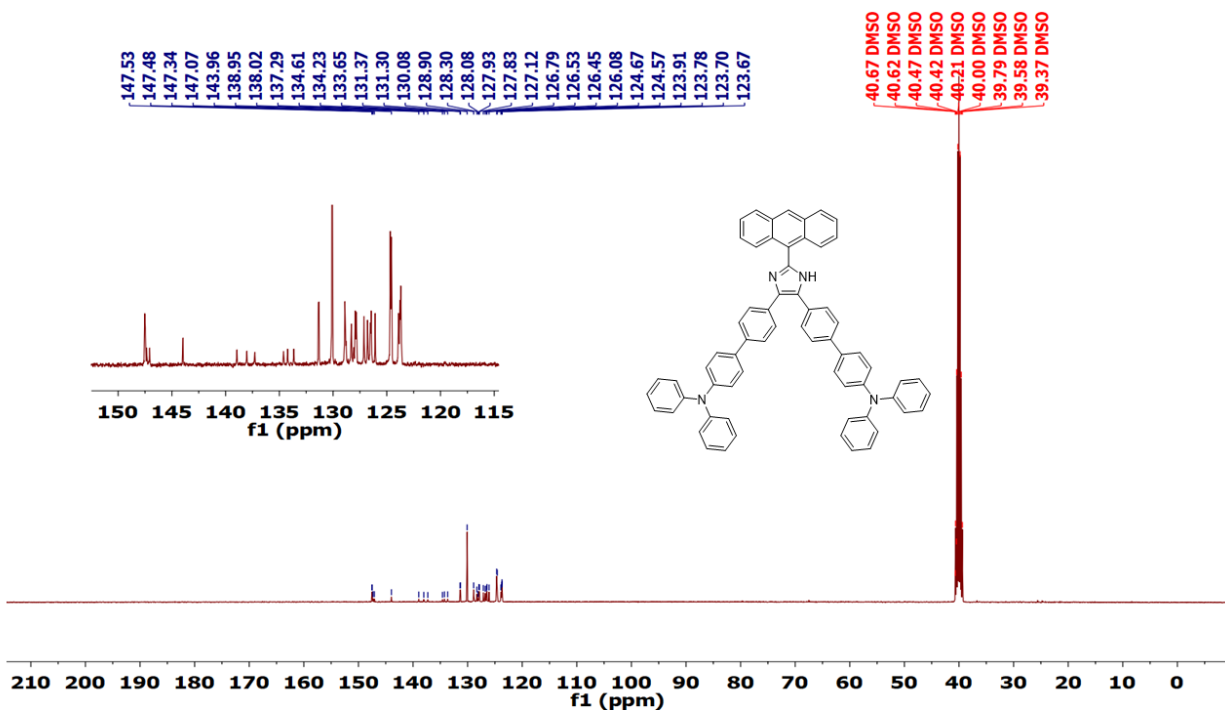

Fig. S-8  $^{13}\text{C}$  NMR (100 MHz,  $\text{DMSO-}d_6$ ) spectrum of compound **5c**.

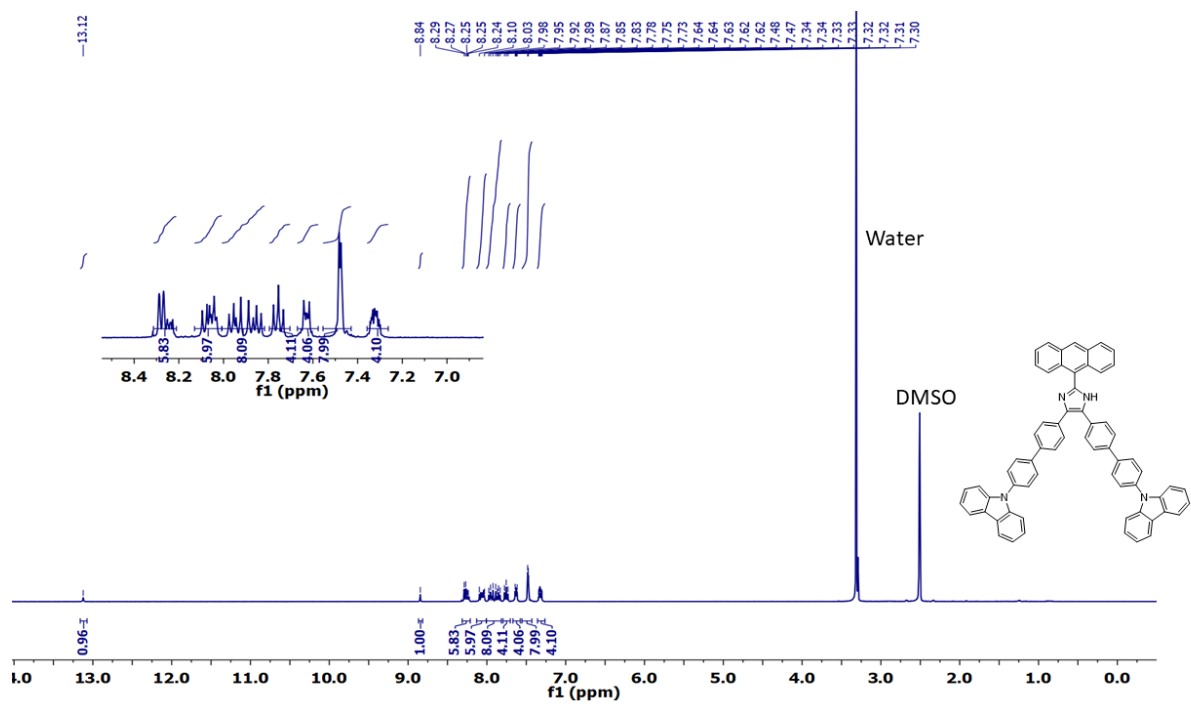

**Fig. S-9**  $^1\text{H}$  NMR (400 MHz,  $\text{DMSO-}d_6$ ) spectrum of compound **5d**.

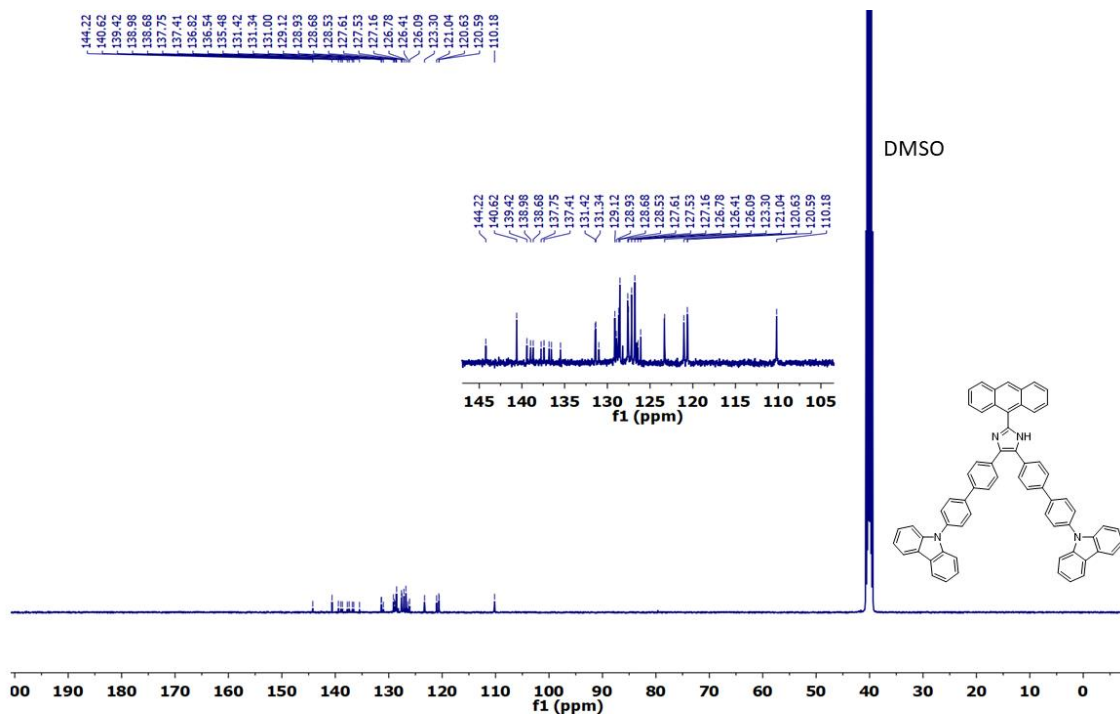

Fig. S-10  $^{13}\text{C}$  NMR (100 MHz,  $\text{DMSO-}d_6$ ) spectrum of compound **5d**.

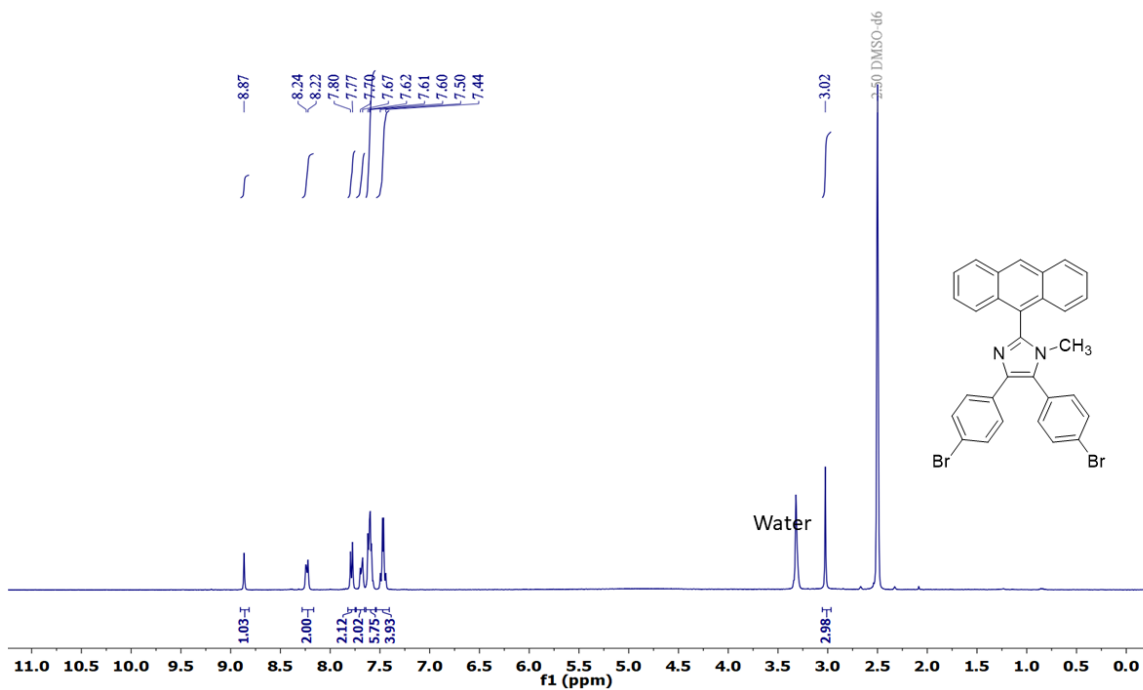

Fig. S-11  $^1\text{H}$  NMR (400 MHz,  $\text{DMSO-}d_6$ ) spectrum of compound **6**.

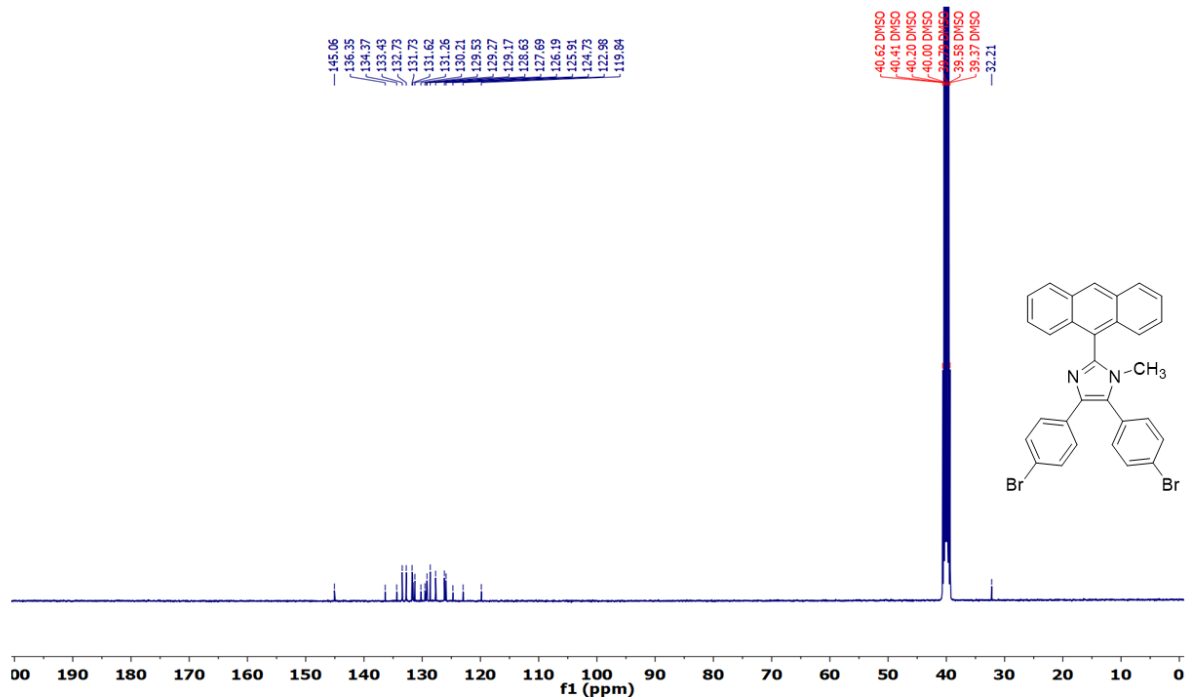

**Fig. S-11**  $^{13}\text{C}$  NMR (100 MHz,  $\text{DMSO-d}_6$ ) spectrum of compound **6**.

### 3. $^1\text{H}$ NMR Titration Result of **3** with TBAF

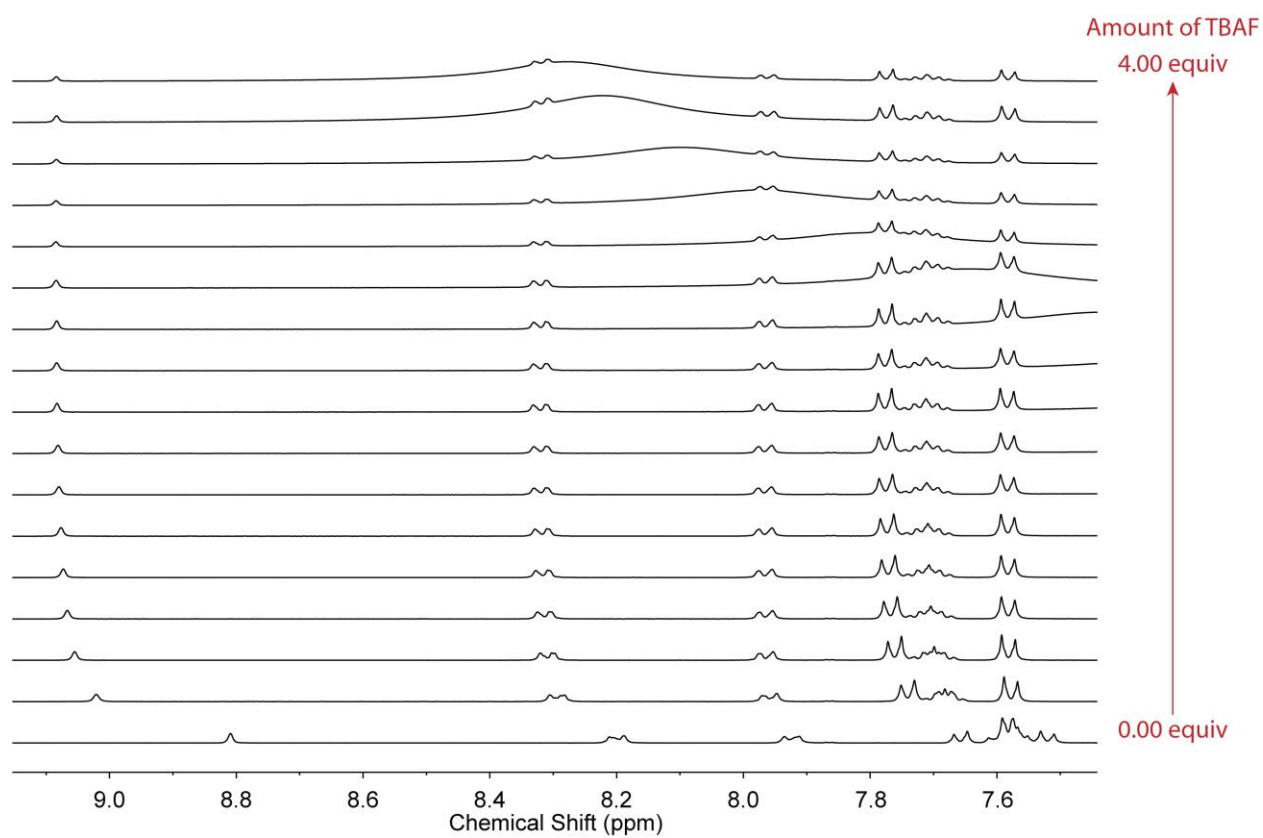

**Fig. S-12**  $^1\text{H}$  NMR (300 MHz,  $\text{DMSO-}d_6$ ) spectra monitoring the titration of compound **3** (3.61 mM) with TBAF from 0.00 to 4.00 mole equiv (addition of 0.25 mole equiv in each step).

### 3. High-Resolution Mass Spectra for Compounds **3**, **5a-d**, and **6**

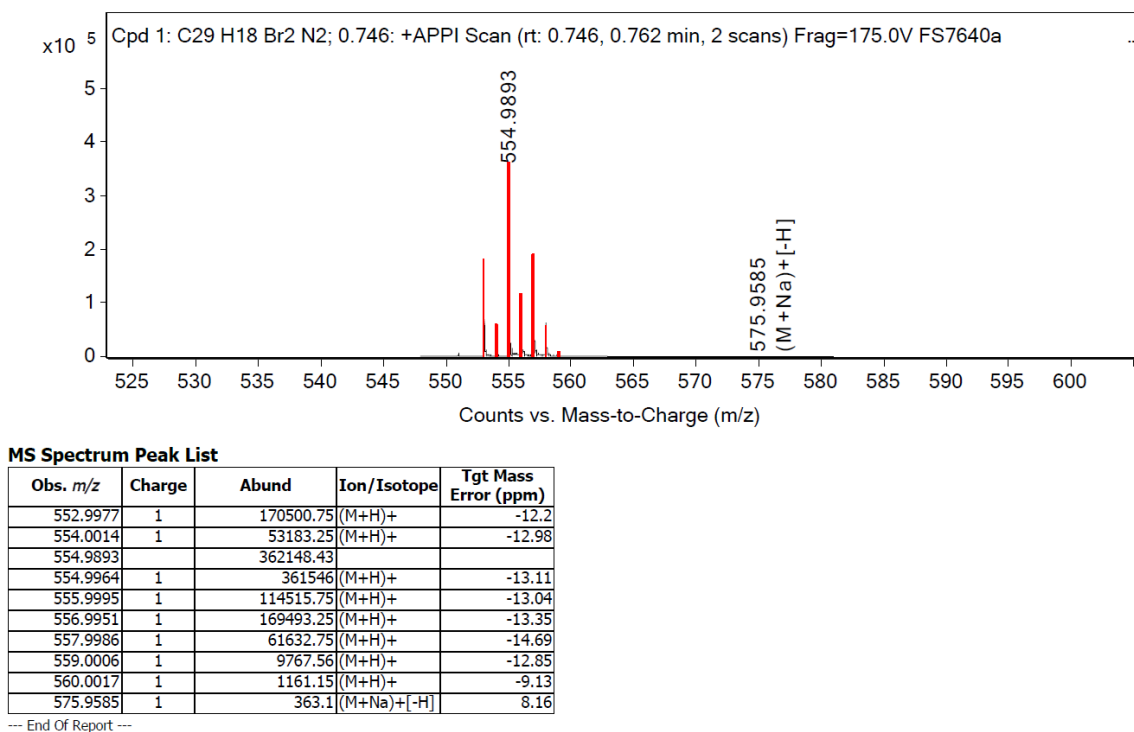

**Fig. S-13** High-resolution mass spectrum (LC-TOF, positive mode) of compound **3**.



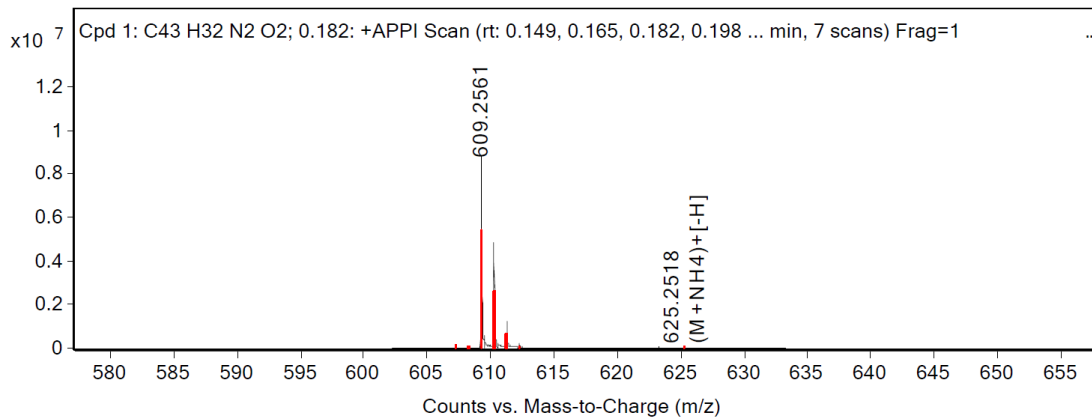

**MS Spectrum Peak List**

| Obs. m/z | Charge | Abund      | Ion/Isotope   | Tgt Mass Error (ppm) |
|----------|--------|------------|---------------|----------------------|
| 607.241  | 1      | 138680.44  | M+[-H]        | -4.94                |
| 608.2449 | 1      | 62663.53   | M+[-H]        | -6.02                |
| 609.2565 | 1      | 5282727    | (M+H)+        | -4.62                |
| 610.2593 | 1      | 2684005.25 | (M+H)+        | -3.9                 |
| 611.2625 | 1      | 685582.44  | (M+H)+        | -3.86                |
| 612.2661 | 1      | 107463.72  | (M+H)+        | -4.67                |
| 613.2684 | 1      | 13322.15   | (M+H)+        | -3.39                |
| 625.2518 | 1      | 51605.78   | (M+NH4)+ [-H] | 32.88                |
| 626.2543 | 1      | 22719.76   | (M+NH4)+ [-H] | 34.07                |
| 627.2557 | 1      | 6610.25    | (M+NH4)+ [-H] | 36.83                |

--- End Of Report ---

**Fig. S-14** High-resolution mass spectrum (LC-TOF, positive mode) of compound **5a**.

**MS Zoomed Spectrum**

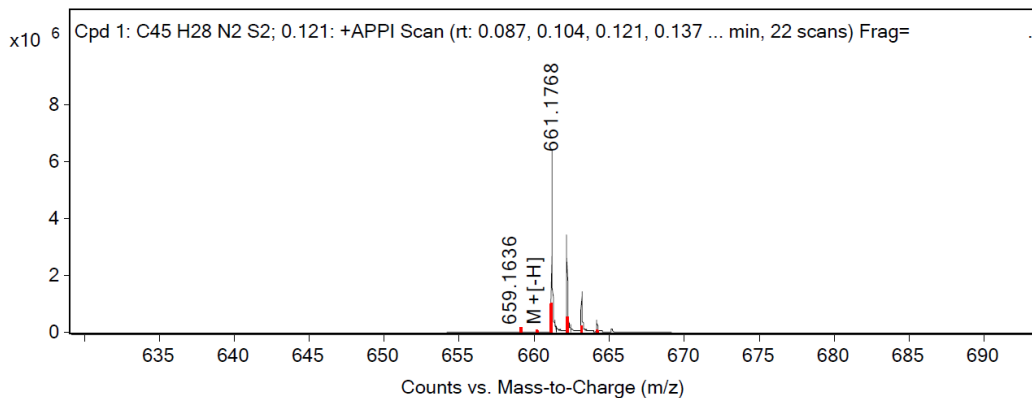

**MS Spectrum Peak List**

| Obs. m/z | Charge | Abund      | Ion/Isotope | Tgt Mass Error (ppm) |
|----------|--------|------------|-------------|----------------------|
| 659.1636 | 1      | 132396.3   | M+[-H]      | -3.98                |
| 660.1668 | 1      | 67889.5    | M+[-H]      | -3.9                 |
| 661.1768 |        | 6437437.58 |             |                      |
| 661.1785 | 1      | 1022435.75 | (M+H)+      | -2.8                 |
| 662.1822 | 1      | 522301.31  | (M+H)+      | -3.61                |
| 663.1819 | 1      | 217120.09  | (M+H)+      | -4.81                |
| 664.1814 | 1      | 58764.23   | (M+H)+      | -3.66                |

--- End Of Report ---

**Fig. S-15** High-resolution mass spectrum (LC-TOF, positive mode) of compound **5b**.

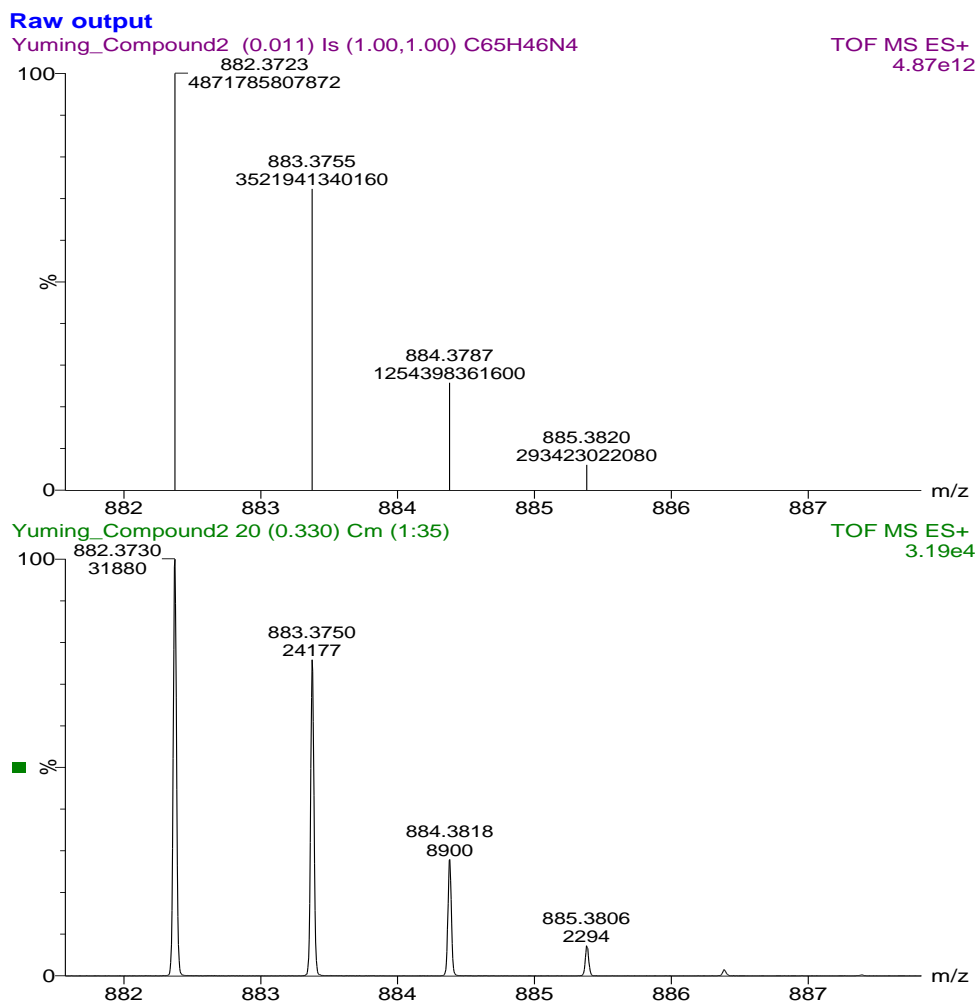

**Fig. S-16** High-resolution mass spectrum (positive mode) of compound **5c** measured using cyclic IMS cyclic ion mobility mass spectrometer (Wilmslow, UK)

MS Zoomed Spectrum

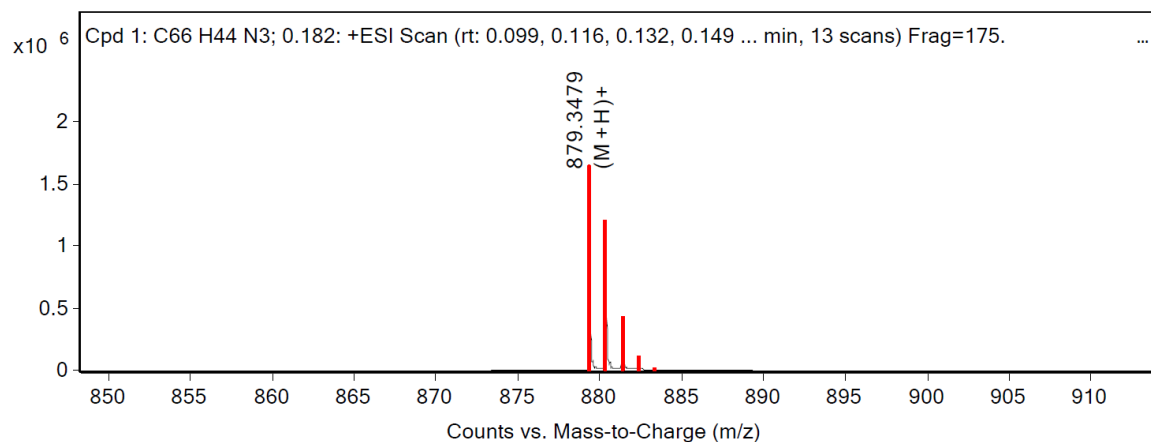

### MS Spectrum Peak List

| <i>m/z</i> | Calc <i>m/z</i> | Diff(ppm) | <i>z</i> | Abund      | Ion    |
|------------|-----------------|-----------|----------|------------|--------|
| 878.3338   | 878.353         | 21.87     | 1        | 530.95     | M+     |
| 879.3479   | 879.3608        | 14.69     |          | 1637209.94 |        |
| 879.3479   | 879.3608        | 14.69     | 1        | 1637432    | (M+H)+ |
| 880.3513   | 880.3641        | 14.48     | 1        | 1197674.88 | (M+H)+ |
| 881.3551   | 881.3674        | 13.88     | 1        | 422578.66  | (M+H)+ |
| 882.3577   | 882.3706        | 14.66     | 1        | 95695.16   | (M+H)+ |
| 883.3606   | 883.3739        | 15.09     | 1        | 13954.7    | (M+H)+ |
| 884.3604   | 884.3772        | 18.97     | 1        | 2051.93    | (M+H)+ |

--- End Of Report ---

**Fig. S-17** High-resolution mass spectrum (LC-TOF, positive mode) of compound **5d**.

## MS Zoomed Spectrum

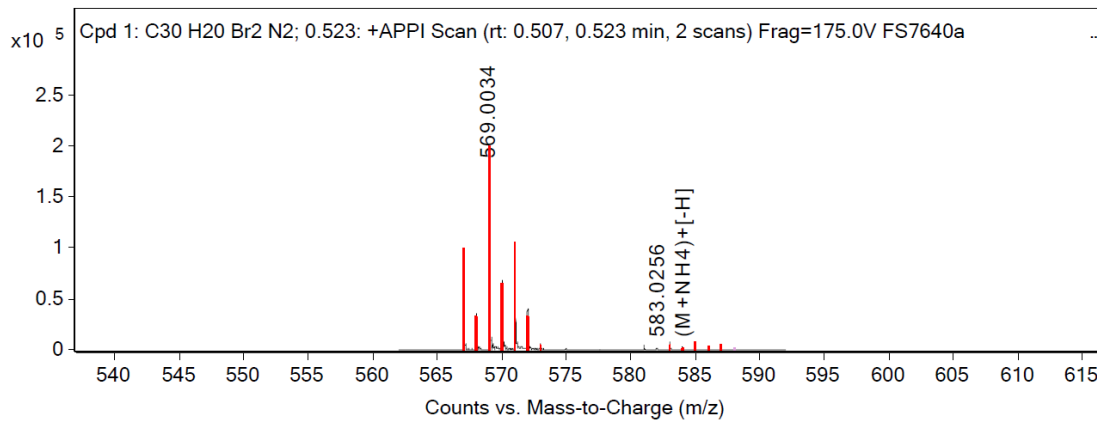

## MS Spectrum Peak List

| Obs. m/z | Charge | Abund    | Ion/Isotope                | Tgt Mass Error (ppm) |
|----------|--------|----------|----------------------------|----------------------|
| 567.0119 | 1      | 96117.25 | (M+H)+                     | -9.33                |
| 568.0158 | 1      | 36106.31 | (M+H)+                     | -10.57               |
| 569.0101 | 1      | 191898.5 | (M+H)+                     | -9.39                |
| 570.0134 | 1      | 68222    | (M+H)+                     | -9.71                |
| 571.0087 | 1      | 102219.5 | (M+H)+                     | -9.42                |
| 572.0122 | 1      | 39948.13 | (M+H)+                     | -10.75               |
| 573.0143 | 1      | 6071.34  | (M+H)+                     | -9.07                |
| 583.0256 | 1      | 8260.83  | (M+NH <sub>4</sub> )+ [-H] | -0.54                |
| 584.0285 | 1      | 2941.85  | (M+NH <sub>4</sub> )+ [-H] | -0.03                |
| 585.0227 | 1      | 3465.42  | (M+NH <sub>4</sub> )+ [-H] | 1.39                 |

--- End Of Report ---

**Fig. S-18** High-resolution mass spectrum (LC-TOF, positive mode) of compound **6**.

## 5. DFT Calculations of Compound **3**

The molecular structure of ADPI **3** was optimized at the M06-2X/Def2-SVP level of theory with the solvent effect (CH<sub>2</sub>Cl<sub>2</sub>, SMD) considered. The optimized geometry was validated by frequency calculations at the same level of theory, which showed no presence of any imaginary frequencies. All calculations were done using the Gaussian 16 software package (Gaussian 16, Revision C.01, M. J. Frisch et al., Gaussian, Inc., Wallingford CT, 2016).

Cartesian coordinates of optimized **3** ( $E = -6371.907813$  Hartree, dipole moment = 6.420254 Debye)

|   |             |             |             |
|---|-------------|-------------|-------------|
| H | 6.27687300  | -3.16143300 | -3.33578400 |
| C | 5.71657400  | -2.53054500 | -2.64388800 |
| H | 7.46012100  | -1.61477700 | -1.80009800 |
| C | 6.37008900  | -1.68081100 | -1.79896800 |
| C | 3.56067300  | -1.81801900 | -1.77013300 |
| C | 5.64292800  | -0.84793100 | -0.88616800 |
| C | 4.29051300  | -2.59391500 | -2.62725700 |
| C | 4.20554500  | -0.91555600 | -0.85794600 |
| C | 6.31184400  | 0.03722300  | -0.03665000 |
| H | 3.77722000  | -3.27319000 | -3.31005600 |
| H | 2.47440300  | -1.89087100 | -1.76265600 |
| C | 5.61717200  | 0.85021200  | 0.86226400  |
| H | 7.40266600  | 0.09128500  | -0.07298500 |
| C | 6.31676100  | 1.74208100  | 1.74031900  |
| C | 4.18052400  | 0.78348100  | 0.91829900  |
| H | 2.43165800  | 1.53051000  | 2.00700400  |
| C | 3.49220200  | -0.08515000 | 0.03865400  |
| C | 5.64126300  | 2.51187700  | 2.64265700  |
| H | 7.40580300  | 1.78324700  | 1.67093200  |
| H | 6.18143800  | 3.18631400  | 3.30886300  |
| C | 4.21915700  | 2.42287200  | 2.72949300  |
| H | 3.68931200  | 3.01936600  | 3.47410000  |
| C | 3.51498100  | 1.59234300  | 1.90260500  |
| C | 2.01156400  | -0.11184900 | 0.04194900  |
| N | 1.25759800  | 1.00388500  | -0.14999800 |
| H | 1.61357100  | 1.94786900  | -0.28023800 |
| N | 1.23951700  | -1.16521500 | 0.20289200  |
| C | -0.05499700 | -0.72326900 | 0.11811500  |
| C | -0.06659900 | 0.65220000  | -0.09277200 |
| C | -1.13087900 | 1.66054100  | -0.21630000 |
| C | -3.11806600 | 3.60818100  | -0.43808300 |
| C | -1.00699800 | 2.70544000  | -1.14348200 |
| C | -2.26704000 | 1.61722900  | 0.60570900  |
| C | -3.26406300 | 2.58177300  | 0.49514500  |
| C | -1.99375700 | 3.68184700  | -1.25691100 |
| H | -0.13538800 | 2.75223500  | -1.79978400 |

|    |             |             |             |
|----|-------------|-------------|-------------|
| H  | -2.36935800 | 0.82372400  | 1.34829600  |
| H  | -4.14241900 | 2.53973600  | 1.14017100  |
| H  | -1.88900000 | 4.48744900  | -1.98404300 |
| C  | -1.17348100 | -1.67965200 | 0.21772900  |
| C  | -3.23064300 | -3.56089700 | 0.41520400  |
| C  | -2.39306100 | -1.47844500 | -0.44513500 |
| C  | -1.00071900 | -2.85556200 | 0.96238400  |
| C  | -2.02179200 | -3.79619700 | 1.06721300  |
| C  | -3.42435900 | -2.40915900 | -0.34539400 |
| H  | -2.54047300 | -0.59202300 | -1.06417200 |
| H  | -0.04815300 | -3.03015100 | 1.46431200  |
| H  | -1.87633000 | -4.70392200 | 1.65379900  |
| H  | -4.36709900 | -2.24235600 | -0.86746900 |
| Br | -4.46905300 | 4.92886900  | -0.59264900 |
| Br | -4.63085200 | -4.83417700 | 0.55401000  |

## 6. Crystallographic Data and Detailed Refinements

### 6.1 Crystallographic Data and Detailed Refinements for 3

**Table S-1** Crystal data and structure refinement

|                                                      |                                                                                        |
|------------------------------------------------------|----------------------------------------------------------------------------------------|
| Identification code                                  | AM-BA                                                                                  |
| Empirical formula                                    | C <sub>29.9</sub> H <sub>19.4</sub> Br <sub>2</sub> Cl <sub>0.2</sub> N <sub>2.4</sub> |
| Formula weight                                       | 579.12                                                                                 |
| Temperature/K                                        | 100(2)                                                                                 |
| Crystal system                                       | triclinic                                                                              |
| Space group                                          | <i>P</i> -1                                                                            |
| <i>a</i> /Å                                          | 14.37750(10)                                                                           |
| <i>b</i> /Å                                          | 15.7779(2)                                                                             |
| <i>c</i> /Å                                          | 23.0024(2)                                                                             |
| $\alpha$ /°                                          | 84.7150(10)                                                                            |
| $\beta$ /°                                           | 78.8930(10)                                                                            |
| $\gamma$ /°                                          | 72.8160(10)                                                                            |
| Volume/Å <sup>3</sup>                                | 4888.27(9)                                                                             |
| <i>Z</i>                                             | 8                                                                                      |
| $\rho_{\text{calc}}$ /g/cm <sup>3</sup>              | 1.574                                                                                  |
| $\mu$ /mm <sup>-1</sup>                              | 4.573                                                                                  |
| <i>F</i> (000)                                       | 2312.0                                                                                 |
| Crystal size/mm <sup>3</sup>                         | 0.064 × 0.052 × 0.036                                                                  |
| Radiation                                            | Cu <i>K</i> α ( $\lambda$ = 1.54184)                                                   |
| 2 $\theta$ range for data collection/°               | 5.868 to 158.75                                                                        |
| Index ranges                                         | -18 ≤ <i>h</i> ≤ 17, -20 ≤ <i>k</i> ≤ 20, -29 ≤ <i>l</i> ≤ 29                          |
| Reflections collected                                | 111890                                                                                 |
| Independent reflections                              | 20384 [ <i>R</i> <sub>int</sub> = 0.0539, <i>R</i> <sub>sigma</sub> = 0.0346]          |
| Data/restraints/parameters                           | 20384/51/1289                                                                          |
| Goodness-of-fit on <i>F</i> <sup>2</sup>             | 1.055                                                                                  |
| Final <i>R</i> indexes [ <i>I</i> >= 2σ( <i>I</i> )] | <i>R</i> <sub>1</sub> = 0.0455, <i>wR</i> <sub>2</sub> = 0.1087                        |
| Final <i>R</i> indexes [all data]                    | <i>R</i> <sub>1</sub> = 0.0536, <i>wR</i> <sub>2</sub> = 0.1139                        |
| Largest diff. peak/hole / e Å <sup>-3</sup>          | 1.58/-1.29                                                                             |

**Table S-2** Fractional Atomic Coordinates ( $\times 10^4$ ) and Equivalent Isotropic Displacement Parameters $(\text{\AA}^2 \times 10^3)$ .  $U_{\text{eq}}$  is defined as 1/3 of the trace of the orthogonalized  $U_{ij}$  tensor.

| Atom | <i>x</i>    | <i>y</i>    | <i>z</i>    | $U(\text{eq})$ |
|------|-------------|-------------|-------------|----------------|
| Br1  | -2763.3 (3) | 7642.4 (3)  | 4597.9 (2)  | 33.25 (9)      |
| Br2  | 3904.4 (3)  | 4406.7 (3)  | 4896.5 (2)  | 42.67 (11)     |
| N1   | -667.5 (19) | 8055.3 (18) | 6971.0 (12) | 20.1 (5)       |
| N2   | 875 (2)     | 7342.5 (18) | 7065.3 (13) | 21.4 (6)       |
| C1   | -232 (2)    | 7507 (2)    | 6494.2 (14) | 19.8 (6)       |
| C2   | 727 (2)     | 7066 (2)    | 6546.7 (14) | 18.8 (6)       |
| C3   | 17 (2)      | 7930 (2)    | 7307.6 (15) | 21.8 (6)       |
| C4   | -808 (2)    | 7494 (2)    | 6035.2 (15) | 19.3 (6)       |
| C5   | -1837 (2)   | 7754 (2)    | 6178.4 (16) | 26.2 (7)       |
| C6   | -2415 (3)   | 7783 (3)    | 5755.3 (17) | 31.3 (8)       |
| C7   | -1966 (3)   | 7556 (2)    | 5186.8 (15) | 24.3 (7)       |
| C8   | -948 (2)    | 7286 (2)    | 5027.7 (16) | 23.9 (7)       |
| C9   | -374 (2)    | 7254 (2)    | 5453.8 (15) | 21.8 (6)       |
| C10  | 1512 (2)    | 6410 (2)    | 6170.7 (15) | 21.0 (6)       |
| C11  | 1326 (2)    | 5643 (2)    | 6018.4 (16) | 23.3 (7)       |
| C12  | 2040 (3)    | 5045 (2)    | 5646.3 (16) | 26.9 (7)       |
| C13  | 2938 (3)    | 5212 (2)    | 5428.2 (16) | 27.9 (7)       |
| C14  | 3148 (3)    | 5957 (3)    | 5578.1 (18) | 31.9 (8)       |
| C15  | 2422 (3)    | 6559 (2)    | 5950.2 (17) | 27.9 (7)       |
| C16  | -183 (2)    | 8313 (2)    | 7898.6 (16) | 25.4 (7)       |
| C17  | 246 (3)     | 8971 (2)    | 7998.5 (17) | 28.2 (8)       |
| C18  | 809 (3)     | 9364 (2)    | 7528 (2)    | 33.9 (9)       |
| C19  | 1202 (3)    | 10014 (3)   | 7639 (2)    | 43.7 (11)      |
| C20  | 1051 (3)    | 10302 (3)   | 8226 (2)    | 47.3 (12)      |
| C21  | 501 (3)     | 9964 (3)    | 8677 (2)    | 45.5 (11)      |
| C22  | 60 (3)      | 9296 (3)    | 8585.4 (19) | 35.3 (9)       |
| C23  | -578 (3)    | 8994 (3)    | 9029.8 (18) | 37.1 (9)       |
| C24  | -1064 (3)   | 8397 (3)    | 8931.8 (17) | 32.6 (8)       |
| C25  | -1781 (3)   | 8137 (3)    | 9377.0 (18) | 38.7 (10)      |
| C26  | -2254 (3)   | 7565 (3)    | 9265.3 (18) | 40.9 (10)      |
| C27  | -2020 (3)   | 7173 (3)    | 8704.7 (18) | 39.7 (9)       |
| C28  | -1329 (3)   | 7396 (3)    | 8264.2 (17) | 31.5 (8)       |
| C29  | -850 (3)    | 8032 (2)    | 8351.5 (16) | 27.6 (7)       |
| Br3  | 4155.3 (4)  | 9721.6 (3)  | 5494.4 (2)  | 42.43 (11)     |
| Br4  | 8833.3 (3)  | 5381.0 (3)  | 7412.2 (2)  | 34.5 (1)       |
| N3   | 2796.3 (19) | 6466.6 (18) | 7380.5 (13) | 21.2 (5)       |
| N4   | 3913 (2)    | 5328.1 (19) | 7707.5 (13) | 20.9 (5)       |



| <b>Atom</b> | <b>x</b>    | <b>y</b>    | <b>z</b>    | <b>U(eq)</b> |
|-------------|-------------|-------------|-------------|--------------|
| C30         | 3726 (2)    | 6588 (2)    | 7195.3 (15) | 22.5 (7)     |
| C31         | 4424 (2)    | 5894 (2)    | 7407.3 (15) | 21.7 (6)     |
| C32         | 2943 (2)    | 5696 (2)    | 7682.5 (15) | 20.3 (6)     |
| C33         | 3849 (2)    | 7339 (2)    | 6790.7 (15) | 23.4 (7)     |
| C34         | 3110 (3)    | 8149 (2)    | 6844.4 (16) | 26.3 (7)     |
| C35         | 3185 (3)    | 8851 (3)    | 6450.9 (17) | 30.4 (8)     |
| C36         | 4001 (3)    | 8745 (3)    | 6008.5 (17) | 32.7 (8)     |
| C37         | 4736 (3)    | 7940 (3)    | 5939.2 (17) | 30.3 (8)     |
| C38         | 4656 (3)    | 7239 (2)    | 6328.3 (16) | 26.3 (7)     |
| C39         | 5490 (2)    | 5763 (2)    | 7380.0 (15) | 22.0 (6)     |
| C40         | 5825 (3)    | 6486 (2)    | 7469.1 (16) | 25.9 (7)     |
| C41         | 6815 (3)    | 6385 (2)    | 7459.5 (16) | 25.8 (7)     |
| C42         | 7485 (2)    | 5545 (2)    | 7368.5 (16) | 25.6 (7)     |
| C43         | 7181 (2)    | 4824 (2)    | 7274.4 (15) | 23.3 (7)     |
| C44         | 6184 (2)    | 4939 (2)    | 7273.8 (15) | 23.3 (7)     |
| C45         | 2156 (2)    | 5267 (2)    | 7919.5 (15) | 21.3 (6)     |
| C46         | 2099 (2)    | 4562 (2)    | 7607.0 (15) | 21.9 (6)     |
| C47         | 2777 (2)    | 4240 (2)    | 7081.4 (16) | 24.4 (7)     |
| C48         | 2685 (3)    | 3565 (2)    | 6788.7 (17) | 28.9 (8)     |
| C49         | 1913 (3)    | 3162 (3)    | 7000.3 (18) | 32.9 (8)     |
| C50         | 1245 (3)    | 3462 (3)    | 7488.9 (19) | 33.5 (8)     |
| C51         | 1302 (3)    | 4172 (2)    | 7810.5 (16) | 26.3 (7)     |
| C52         | 615 (3)     | 4494 (3)    | 8310.5 (17) | 29.2 (8)     |
| C53         | 672 (3)     | 5185 (2)    | 8623.3 (16) | 27.8 (7)     |
| C54         | -16 (3)     | 5490 (3)    | 9149.8 (18) | 35.4 (9)     |
| C55         | 59 (3)      | 6160 (3)    | 9451.1 (17) | 36.1 (9)     |
| C56         | 806 (3)     | 6584 (3)    | 9239.3 (17) | 34.9 (9)     |
| C57         | 1485 (3)    | 6308 (2)    | 8746.9 (17) | 28.6 (7)     |
| C58         | 1449 (2)    | 5591 (2)    | 8419.9 (15) | 23.6 (7)     |
| Br5         | 4538.1 (3)  | 7330.4 (3)  | 9908.2 (2)  | 41.46 (11)   |
| Br6         | 10638.4 (3) | 2310.4 (3)  | 9147.2 (2)  | 36.14 (10)   |
| N5          | 4973.5 (19) | 3698.8 (18) | 8281.8 (12) | 19.6 (5)     |
| N6          | 6414 (2)    | 2717.1 (18) | 8005.8 (12) | 19.4 (5)     |
| C59         | 5694 (2)    | 3919 (2)    | 8508.6 (14) | 19.3 (6)     |
| C60         | 6595 (2)    | 3305 (2)    | 8349.9 (14) | 19.5 (6)     |
| C61         | 5439 (2)    | 2964 (2)    | 7983.2 (14) | 19.8 (6)     |
| C62         | 5427 (2)    | 4743 (2)    | 8839.9 (14) | 20.7 (6)     |
| C63         | 4471 (3)    | 5060 (2)    | 9159.4 (16) | 27.1 (7)     |
| C64         | 4189 (3)    | 5835 (3)    | 9469.3 (17) | 31.4 (8)     |
| C65         | 4886 (3)    | 6284 (2)    | 9461.7 (16) | 28.3 (7)     |
| C66         | 5833 (3)    | 5993 (2)    | 9147.5 (16) | 29.1 (8)     |

| <b>Atom</b> | <b>x</b>    | <b>y</b>    | <b>z</b>    | <b>U(eq)</b> |
|-------------|-------------|-------------|-------------|--------------|
| C67         | 6095 (3)    | 5229 (2)    | 8829.9 (16) | 25.8 (7)     |
| C68         | 7571 (2)    | 3139 (2)    | 8518.7 (15) | 20.9 (6)     |
| C69         | 7667 (3)    | 3398 (2)    | 9061.0 (16) | 27.0 (7)     |
| C70         | 8573 (3)    | 3182 (3)    | 9243.6 (16) | 29.5 (8)     |
| C71         | 9395 (3)    | 2671 (2)    | 8883.5 (17) | 27.3 (7)     |
| C72         | 9331 (3)    | 2405 (2)    | 8342.0 (16) | 25.5 (7)     |
| C73         | 8420 (2)    | 2653 (2)    | 8159.1 (15) | 21.3 (6)     |
| C74         | 4960 (2)    | 2393 (2)    | 7743.0 (15) | 20.8 (6)     |
| C75         | 5017 (2)    | 2338 (2)    | 7129.8 (16) | 23.9 (7)     |
| C76         | 5486 (3)    | 2859 (2)    | 6694.8 (16) | 27.1 (7)     |
| C77         | 5513 (3)    | 2802 (3)    | 6103.1 (17) | 33.7 (8)     |
| C78         | 5096 (3)    | 2186 (3)    | 5907.6 (19) | 40.5 (11)    |
| C79         | 4653 (3)    | 1674 (3)    | 6302 (2)    | 38.1 (10)    |
| C80         | 4574 (2)    | 1741 (2)    | 6922.7 (18) | 28.6 (8)     |
| C81         | 4065 (3)    | 1259 (2)    | 7336 (2)    | 35.9 (9)     |
| C82         | 3983 (3)    | 1323 (2)    | 7940 (2)    | 33.1 (9)     |
| C83         | 3454 (3)    | 835 (3)     | 8365 (2)    | 43.8 (11)    |
| C84         | 3402 (3)    | 885 (3)     | 8955 (3)    | 49.4 (12)    |
| C85         | 3908 (3)    | 1409 (3)    | 9165 (2)    | 45.1 (11)    |
| C86         | 4421 (3)    | 1890 (3)    | 8779.7 (19) | 33.4 (8)     |
| C87         | 4461 (2)    | 1883 (2)    | 8155.9 (17) | 25.6 (7)     |
| Br7         | 8994.7 (3)  | 5069.6 (2)  | 5730.4 (2)  | 31.17 (9)    |
| Br8         | 12547.3 (3) | -918.2 (3)  | 4573.7 (2)  | 29.65 (9)    |
| N7          | 7811.8 (19) | 1388.4 (17) | 7221.4 (12) | 18.2 (5)     |
| N8          | 8579.5 (19) | 31.3 (18)   | 6922.9 (12) | 18.3 (5)     |
| C88         | 8586 (2)    | 1420 (2)    | 6764.0 (14) | 18.7 (6)     |
| C89         | 9083 (2)    | 571 (2)     | 6572.9 (14) | 18.9 (6)     |
| C90         | 7837 (2)    | 543 (2)     | 7308.0 (14) | 18.9 (6)     |
| C91         | 8723 (2)    | 2288 (2)    | 6510.0 (14) | 19.6 (6)     |
| C92         | 8096 (2)    | 2786 (2)    | 6135.2 (15) | 23.8 (7)     |
| C93         | 8178 (3)    | 3610 (2)    | 5895.2 (16) | 25.4 (7)     |
| C94         | 8890 (2)    | 3939 (2)    | 6047.7 (15) | 21.2 (6)     |
| C95         | 9519 (2)    | 3465 (2)    | 6420.7 (15) | 21.8 (6)     |
| C96         | 9438 (2)    | 2635 (2)    | 6648.2 (15) | 21.3 (6)     |
| C97         | 9909 (2)    | 227 (2)     | 6097.7 (14) | 19.3 (6)     |
| C98         | 10643 (3)   | 652 (2)     | 5905.8 (17) | 27.2 (7)     |
| C99         | 11423 (3)   | 322 (2)     | 5448.7 (16) | 27.3 (7)     |
| C100        | 11480 (2)   | -457 (2)    | 5191.2 (15) | 23.3 (7)     |
| C101        | 10762 (3)   | -895 (2)    | 5374.8 (16) | 27.4 (7)     |
| C102        | 9974 (3)    | -546 (2)    | 5819.5 (15) | 24.4 (7)     |
| C103        | 7156 (2)    | 182 (2)     | 7757.4 (15) | 20.4 (6)     |

| <b>Atom</b> | <b>x</b>  | <b>y</b>  | <b>z</b>    | <b>U(eq)</b> |
|-------------|-----------|-----------|-------------|--------------|
| C104        | 6544 (2)  | -258 (2)  | 7571.7 (15) | 21.2 (6)     |
| C105        | 6483 (2)  | -300 (2)  | 6963.8 (16) | 24.0 (7)     |
| C106        | 5849 (3)  | -704 (2)  | 6808.7 (17) | 28.1 (7)     |
| C107        | 5258 (3)  | -1110 (2) | 7244.9 (19) | 33.3 (8)     |
| C108        | 5298 (3)  | -1082 (2) | 7828.3 (19) | 31.6 (8)     |
| C109        | 5914 (2)  | -638 (2)  | 8016.8 (17) | 25.4 (7)     |
| C110        | 5891 (3)  | -536 (2)  | 8613.1 (17) | 28.0 (7)     |
| C111        | 6446 (3)  | -55 (2)   | 8796.8 (16) | 25.7 (7)     |
| C112        | 6369 (3)  | 110 (3)   | 9408.9 (17) | 32.3 (8)     |
| C113        | 6908 (3)  | 586 (3)   | 9579.5 (17) | 33.6 (8)     |
| C114        | 7586 (3)  | 914 (2)   | 9156.9 (16) | 30.8 (8)     |
| C115        | 7697 (3)  | 763 (2)   | 8569.2 (16) | 24.7 (7)     |
| C116        | 7111 (2)  | 298 (2)   | 8363.6 (15) | 21.2 (6)     |
| Cl1         | 3340 (4)  | 7679 (3)  | 8394.6 (18) | 84.1 (19)    |
| Cl2         | 2026 (4)  | 8255 (4)  | 9494 (3)    | 50.7 (12)    |
| C119        | 2873 (11) | 8553 (8)  | 8898 (6)    | 65 (4)       |
| N9          | 2256 (3)  | 4816 (3)  | 10070 (2)   | 53.5 (10)    |
| C117        | 2350 (3)  | 4329 (3)  | 9710 (2)    | 39.2 (9)     |
| C118        | 2497 (3)  | 3697 (3)  | 9250 (2)    | 42.7 (10)    |
| N10         | 2829 (9)  | 8160 (8)  | 8592 (5)    | 89 (3)       |
| C120        | 2382 (9)  | 8228 (9)  | 9079 (5)    | 76 (3)       |
| C121        | 1735 (12) | 8411 (14) | 9628 (6)    | 67 (4)       |

**Table S-3** Selected Bond Distances (Å)

| <b>Atom</b> | <b>Atom</b> | <b>Length/Å</b> | <b>Atom</b> | <b>Atom</b> | <b>Length/Å</b> |
|-------------|-------------|-----------------|-------------|-------------|-----------------|
| Br1         | C7          | 1.908 (3)       | N5          | C61         | 1.332 (4)       |
| Br2         | C13         | 1.905 (3)       | N6          | C60         | 1.383 (4)       |
| N1          | C1          | 1.391 (4)       | N6          | C61         | 1.349 (4)       |
| N1          | C3          | 1.325 (4)       | C59         | C60         | 1.376 (4)       |
| N2          | C2          | 1.381 (4)       | C59         | C62         | 1.481 (4)       |
| N2          | C3          | 1.359 (4)       | C60         | C68         | 1.471 (4)       |
| C1          | C2          | 1.372 (4)       | C61         | C74         | 1.483 (4)       |
| C1          | C4          | 1.467 (4)       | C62         | C63         | 1.397 (5)       |
| C2          | C10         | 1.480 (4)       | C62         | C67         | 1.390 (5)       |
| C3          | C16         | 1.482 (5)       | C63         | C64         | 1.387 (5)       |
| C4          | C5          | 1.394 (5)       | C64         | C65         | 1.386 (5)       |
| C4          | C9          | 1.398 (5)       | C65         | C66         | 1.378 (5)       |
| C5          | C6          | 1.385 (5)       | C66         | C67         | 1.385 (5)       |

| Atom | Atom | Length/Å  | Atom | Atom | Length/Å  |
|------|------|-----------|------|------|-----------|
| C6   | C7   | 1.371 (5) | C68  | C69  | 1.391 (5) |
| C7   | C8   | 1.382 (5) | C68  | C73  | 1.392 (4) |
| C8   | C9   | 1.387 (5) | C69  | C70  | 1.383 (5) |
| C10  | C11  | 1.401 (5) | C70  | C71  | 1.384 (5) |
| C10  | C15  | 1.389 (5) | C71  | C72  | 1.378 (5) |
| C11  | C12  | 1.384 (5) | C72  | C73  | 1.387 (5) |
| C12  | C13  | 1.385 (5) | C74  | C75  | 1.406 (5) |
| C13  | C14  | 1.384 (5) | C74  | C87  | 1.414 (5) |
| C14  | C15  | 1.394 (5) | C75  | C76  | 1.431 (5) |
| C16  | C17  | 1.410 (5) | C75  | C80  | 1.439 (5) |
| C16  | C29  | 1.408 (6) | C76  | C77  | 1.365 (5) |
| C17  | C18  | 1.431 (6) | C77  | C78  | 1.426 (6) |
| C17  | C22  | 1.437 (5) | C78  | C79  | 1.353 (7) |
| C18  | C19  | 1.373 (5) | C79  | C80  | 1.421 (6) |
| C19  | C20  | 1.422 (7) | C80  | C81  | 1.396 (6) |
| C20  | C21  | 1.347 (8) | C81  | C82  | 1.381 (6) |
| C21  | C22  | 1.430 (6) | C82  | C83  | 1.432 (6) |
| C22  | C23  | 1.386 (7) | C82  | C87  | 1.440 (5) |
| C23  | C24  | 1.383 (6) | C83  | C84  | 1.353 (7) |
| C24  | C25  | 1.431 (6) | C84  | C85  | 1.418 (7) |
| C24  | C29  | 1.445 (5) | C85  | C86  | 1.364 (6) |
| C25  | C26  | 1.347 (7) | C86  | C87  | 1.426 (6) |
| C26  | C27  | 1.420 (6) | Br7  | C94  | 1.900 (3) |
| C27  | C28  | 1.375 (6) | Br8  | C100 | 1.895 (3) |
| C28  | C29  | 1.421 (5) | N7   | C88  | 1.386 (4) |
| Br3  | C36  | 1.893 (4) | N7   | C90  | 1.322 (4) |
| Br4  | C42  | 1.900 (3) | N8   | C89  | 1.382 (4) |
| N3   | C30  | 1.386 (4) | N8   | C90  | 1.354 (4) |
| N3   | C32  | 1.325 (4) | C88  | C89  | 1.386 (4) |
| N4   | C31  | 1.375 (5) | C88  | C91  | 1.492 (4) |
| N4   | C32  | 1.353 (4) | C89  | C97  | 1.459 (4) |
| C30  | C31  | 1.374 (5) | C90  | C103 | 1.477 (5) |
| C30  | C33  | 1.469 (5) | C91  | C92  | 1.389 (5) |
| C31  | C39  | 1.473 (4) | C91  | C96  | 1.396 (4) |
| C32  | C45  | 1.477 (5) | C92  | C93  | 1.394 (5) |
| C33  | C34  | 1.397 (5) | C93  | C94  | 1.388 (5) |
| C33  | C38  | 1.396 (5) | C94  | C95  | 1.377 (5) |
| C34  | C35  | 1.381 (5) | C95  | C96  | 1.393 (5) |
| C35  | C36  | 1.377 (6) | C97  | C98  | 1.394 (5) |
| C36  | C37  | 1.392 (6) | C97  | C102 | 1.399 (4) |
| C37  | C38  | 1.374 (5) | C98  | C99  | 1.392 (5) |

| Atom | Atom | Length/Å  | Atom | Atom | Length/Å  |
|------|------|-----------|------|------|-----------|
| C39  | C40  | 1.408 (5) | C99  | C100 | 1.388 (5) |
| C39  | C44  | 1.394 (5) | C100 | C101 | 1.387 (5) |
| C40  | C41  | 1.381 (5) | C101 | C102 | 1.387 (5) |
| C41  | C42  | 1.395 (5) | C103 | C104 | 1.414 (5) |
| C42  | C43  | 1.380 (5) | C103 | C116 | 1.410 (4) |
| C43  | C44  | 1.391 (5) | C104 | C105 | 1.427 (5) |
| C45  | C46  | 1.410 (5) | C104 | C109 | 1.442 (5) |
| C45  | C58  | 1.404 (5) | C105 | C106 | 1.369 (5) |
| C46  | C47  | 1.427 (5) | C106 | C107 | 1.420 (6) |
| C46  | C51  | 1.437 (5) | C107 | C108 | 1.360 (6) |
| C47  | C48  | 1.361 (5) | C108 | C109 | 1.426 (5) |
| C48  | C49  | 1.424 (6) | C109 | C110 | 1.389 (5) |
| C49  | C50  | 1.350 (6) | C110 | C111 | 1.392 (5) |
| C50  | C51  | 1.428 (5) | C111 | C112 | 1.433 (5) |
| C51  | C52  | 1.389 (5) | C111 | C116 | 1.436 (5) |
| C52  | C53  | 1.390 (5) | C112 | C113 | 1.354 (6) |
| C53  | C54  | 1.429 (5) | C113 | C114 | 1.415 (6) |
| C53  | C58  | 1.429 (5) | C114 | C115 | 1.365 (5) |
| C54  | C55  | 1.357 (6) | C115 | C116 | 1.432 (5) |
| C55  | C56  | 1.414 (6) | Cl1  | C119 | 1.772 (8) |
| C56  | C57  | 1.356 (5) | Cl2  | C119 | 1.778 (8) |
| C57  | C58  | 1.433 (5) | N9   | C117 | 1.144 (6) |
| Br5  | C65  | 1.912 (3) | C117 | C118 | 1.463 (6) |
| Br6  | C71  | 1.908 (3) | N10  | C120 | 1.177 (8) |
| N5   | C59  | 1.386 (4) | C120 | C121 | 1.414 (8) |

**Table S-4** Selected Bond Angles

| Atom | Atom | Atom | Angle/°   | Atom | Atom | Atom | Angle/°   |
|------|------|------|-----------|------|------|------|-----------|
| C3   | N1   | C1   | 105.9 (3) | N5   | C59  | C62  | 119.5 (3) |
| C3   | N2   | C2   | 107.6 (3) | C60  | C59  | N5   | 109.9 (3) |
| N1   | C1   | C4   | 119.3 (3) | C60  | C59  | C62  | 130.5 (3) |
| C2   | C1   | N1   | 109.5 (3) | N6   | C60  | C68  | 120.9 (3) |
| C2   | C1   | C4   | 131.2 (3) | C59  | C60  | N6   | 105.0 (3) |
| N2   | C2   | C10  | 122.1 (3) | C59  | C60  | C68  | 133.8 (3) |
| C1   | C2   | N2   | 105.9 (3) | N5   | C61  | N6   | 110.8 (3) |
| C1   | C2   | C10  | 132.0 (3) | N5   | C61  | C74  | 125.8 (3) |
| N1   | C3   | N2   | 111.1 (3) | N6   | C61  | C74  | 122.6 (3) |

| Atom | Atom | Atom | Angle/°  | Atom | Atom | Atom | Angle/°  |
|------|------|------|----------|------|------|------|----------|
| N1   | C3   | C16  | 123.3(3) | C63  | C62  | C59  | 119.6(3) |
| N2   | C3   | C16  | 125.4(3) | C67  | C62  | C59  | 121.8(3) |
| C5   | C4   | C1   | 118.8(3) | C67  | C62  | C63  | 118.6(3) |
| C5   | C4   | C9   | 118.1(3) | C64  | C63  | C62  | 121.3(3) |
| C9   | C4   | C1   | 123.0(3) | C65  | C64  | C63  | 118.2(3) |
| C6   | C5   | C4   | 121.0(3) | C64  | C65  | Br5  | 119.4(3) |
| C7   | C6   | C5   | 119.4(3) | C66  | C65  | Br5  | 118.7(3) |
| C6   | C7   | Br1  | 119.3(3) | C66  | C65  | C64  | 121.9(3) |
| C6   | C7   | C8   | 121.5(3) | C65  | C66  | C67  | 119.0(3) |
| C8   | C7   | Br1  | 119.3(3) | C66  | C67  | C62  | 120.8(3) |
| C7   | C8   | C9   | 118.9(3) | C69  | C68  | C60  | 121.2(3) |
| C8   | C9   | C4   | 121.1(3) | C69  | C68  | C73  | 118.0(3) |
| C11  | C10  | C2   | 119.8(3) | C73  | C68  | C60  | 120.5(3) |
| C15  | C10  | C2   | 120.8(3) | C70  | C69  | C68  | 121.6(3) |
| C15  | C10  | C11  | 119.4(3) | C69  | C70  | C71  | 118.7(3) |
| C12  | C11  | C10  | 120.3(3) | C70  | C71  | Br6  | 119.4(3) |
| C11  | C12  | C13  | 119.2(3) | C72  | C71  | Br6  | 119.3(3) |
| C12  | C13  | Br2  | 119.2(3) | C72  | C71  | C70  | 121.3(3) |
| C14  | C13  | Br2  | 119.0(3) | C71  | C72  | C73  | 119.0(3) |
| C14  | C13  | C12  | 121.8(3) | C72  | C73  | C68  | 121.3(3) |
| C13  | C14  | C15  | 118.5(3) | C75  | C74  | C61  | 121.7(3) |
| C10  | C15  | C14  | 120.8(3) | C75  | C74  | C87  | 120.9(3) |
| C17  | C16  | C3   | 121.1(3) | C87  | C74  | C61  | 117.3(3) |
| C29  | C16  | C3   | 118.1(3) | C74  | C75  | C76  | 123.1(3) |
| C29  | C16  | C17  | 120.8(3) | C74  | C75  | C80  | 119.2(3) |
| C16  | C17  | C18  | 122.1(3) | C76  | C75  | C80  | 117.7(3) |
| C16  | C17  | C22  | 118.8(4) | C77  | C76  | C75  | 121.7(3) |
| C18  | C17  | C22  | 119.0(3) | C76  | C77  | C78  | 119.6(4) |
| C19  | C18  | C17  | 120.5(4) | C79  | C78  | C77  | 120.8(4) |
| C18  | C19  | C20  | 120.0(5) | C78  | C79  | C80  | 121.2(4) |
| C21  | C20  | C19  | 121.0(4) | C79  | C80  | C75  | 119.0(4) |
| C20  | C21  | C22  | 121.5(4) | C81  | C80  | C75  | 119.1(3) |
| C21  | C22  | C17  | 117.9(4) | C81  | C80  | C79  | 121.9(3) |
| C23  | C22  | C17  | 119.4(4) | C82  | C81  | C80  | 122.2(3) |
| C23  | C22  | C21  | 122.6(4) | C81  | C82  | C83  | 122.4(4) |
| C24  | C23  | C22  | 122.7(4) | C81  | C82  | C87  | 119.5(4) |
| C23  | C24  | C25  | 122.9(4) | C83  | C82  | C87  | 118.1(4) |
| C23  | C24  | C29  | 118.6(4) | C84  | C83  | C82  | 121.8(4) |
| C25  | C24  | C29  | 118.5(4) | C83  | C84  | C85  | 119.8(4) |
| C26  | C25  | C24  | 121.5(4) | C86  | C85  | C84  | 120.9(5) |
| C25  | C26  | C27  | 120.5(4) | C85  | C86  | C87  | 121.0(4) |

| Atom | Atom | Atom | Angle/°   | Atom | Atom | Atom | Angle/°   |
|------|------|------|-----------|------|------|------|-----------|
| C28  | C27  | C26  | 120.1 (4) | C74  | C87  | C82  | 118.9 (3) |
| C27  | C28  | C29  | 121.4 (4) | C74  | C87  | C86  | 122.8 (3) |
| C16  | C29  | C24  | 119.4 (3) | C86  | C87  | C82  | 118.3 (3) |
| C16  | C29  | C28  | 122.7 (3) | C90  | N7   | C88  | 106.1 (3) |
| C28  | C29  | C24  | 117.9 (4) | C90  | N8   | C89  | 108.6 (3) |
| C32  | N3   | C30  | 105.6 (3) | N7   | C88  | C91  | 120.7 (3) |
| C32  | N4   | C31  | 107.9 (3) | C89  | C88  | N7   | 109.8 (3) |
| N3   | C30  | C33  | 120.1 (3) | C89  | C88  | C91  | 129.2 (3) |
| C31  | C30  | N3   | 109.7 (3) | N8   | C89  | C88  | 104.6 (3) |
| C31  | C30  | C33  | 129.9 (3) | N8   | C89  | C97  | 122.3 (3) |
| N4   | C31  | C39  | 124.2 (3) | C88  | C89  | C97  | 133.0 (3) |
| C30  | C31  | N4   | 105.5 (3) | N7   | C90  | N8   | 110.9 (3) |
| C30  | C31  | C39  | 130.2 (3) | N7   | C90  | C103 | 125.8 (3) |
| N3   | C32  | N4   | 111.2 (3) | N8   | C90  | C103 | 123.3 (3) |
| N3   | C32  | C45  | 123.9 (3) | C92  | C91  | C88  | 118.9 (3) |
| N4   | C32  | C45  | 124.7 (3) | C92  | C91  | C96  | 118.5 (3) |
| C34  | C33  | C30  | 119.3 (3) | C96  | C91  | C88  | 122.6 (3) |
| C38  | C33  | C30  | 121.2 (3) | C91  | C92  | C93  | 121.3 (3) |
| C38  | C33  | C34  | 119.4 (3) | C94  | C93  | C92  | 118.7 (3) |
| C35  | C34  | C33  | 120.4 (3) | C93  | C94  | Br7  | 118.9 (3) |
| C36  | C35  | C34  | 119.1 (4) | C95  | C94  | Br7  | 119.6 (2) |
| C35  | C36  | Br3  | 119.7 (3) | C95  | C94  | C93  | 121.5 (3) |
| C35  | C36  | C37  | 121.4 (3) | C94  | C95  | C96  | 119.0 (3) |
| C37  | C36  | Br3  | 118.8 (3) | C95  | C96  | C91  | 121.0 (3) |
| C38  | C37  | C36  | 119.3 (3) | C98  | C97  | C89  | 121.7 (3) |
| C37  | C38  | C33  | 120.3 (3) | C98  | C97  | C102 | 118.4 (3) |
| C40  | C39  | C31  | 119.5 (3) | C102 | C97  | C89  | 119.9 (3) |
| C44  | C39  | C31  | 122.1 (3) | C99  | C98  | C97  | 121.2 (3) |
| C44  | C39  | C40  | 118.4 (3) | C100 | C99  | C98  | 119.0 (3) |
| C41  | C40  | C39  | 121.2 (3) | C99  | C100 | Br8  | 119.4 (3) |
| C40  | C41  | C42  | 118.8 (3) | C101 | C100 | Br8  | 119.7 (2) |
| C41  | C42  | Br4  | 119.1 (3) | C101 | C100 | C99  | 120.9 (3) |
| C43  | C42  | Br4  | 119.4 (3) | C100 | C101 | C102 | 119.4 (3) |
| C43  | C42  | C41  | 121.5 (3) | C101 | C102 | C97  | 120.9 (3) |
| C42  | C43  | C44  | 119.2 (3) | C104 | C103 | C90  | 119.4 (3) |
| C43  | C44  | C39  | 121.0 (3) | C116 | C103 | C90  | 119.5 (3) |
| C46  | C45  | C32  | 118.1 (3) | C116 | C103 | C104 | 121.0 (3) |
| C58  | C45  | C32  | 120.8 (3) | C103 | C104 | C105 | 122.8 (3) |
| C58  | C45  | C46  | 121.0 (3) | C103 | C104 | C109 | 118.6 (3) |
| C45  | C46  | C47  | 122.7 (3) | C105 | C104 | C109 | 118.5 (3) |
| C45  | C46  | C51  | 118.9 (3) | C106 | C105 | C104 | 120.5 (3) |

| Atom | Atom | Atom | Angle/°   | Atom | Atom | Atom | Angle/°    |
|------|------|------|-----------|------|------|------|------------|
| C47  | C46  | C51  | 118.4 (3) | C105 | C106 | C107 | 121.1 (4)  |
| C48  | C47  | C46  | 120.8 (3) | C108 | C107 | C106 | 119.9 (3)  |
| C47  | C48  | C49  | 120.8 (3) | C107 | C108 | C109 | 121.4 (4)  |
| C50  | C49  | C48  | 120.0 (3) | C108 | C109 | C104 | 118.5 (3)  |
| C49  | C50  | C51  | 121.5 (4) | C110 | C109 | C104 | 119.8 (3)  |
| C50  | C51  | C46  | 118.5 (3) | C110 | C109 | C108 | 121.7 (3)  |
| C52  | C51  | C46  | 119.3 (3) | C109 | C110 | C111 | 121.7 (3)  |
| C52  | C51  | C50  | 122.2 (3) | C110 | C111 | C112 | 122.0 (3)  |
| C51  | C52  | C53  | 122.1 (3) | C110 | C111 | C116 | 119.6 (3)  |
| C52  | C53  | C54  | 121.7 (4) | C112 | C111 | C116 | 118.4 (3)  |
| C52  | C53  | C58  | 119.3 (3) | C113 | C112 | C111 | 121.3 (4)  |
| C58  | C53  | C54  | 119.0 (3) | C112 | C113 | C114 | 120.6 (3)  |
| C55  | C54  | C53  | 120.7 (4) | C115 | C114 | C113 | 120.3 (4)  |
| C54  | C55  | C56  | 120.4 (4) | C114 | C115 | C116 | 121.1 (3)  |
| C57  | C56  | C55  | 121.0 (4) | C103 | C116 | C111 | 119.1 (3)  |
| C56  | C57  | C58  | 120.7 (4) | C103 | C116 | C115 | 122.8 (3)  |
| C45  | C58  | C53  | 119.4 (3) | C115 | C116 | C111 | 118.1 (3)  |
| C45  | C58  | C57  | 122.4 (3) | Cl1  | C119 | Cl2  | 109.0 (5)  |
| C53  | C58  | C57  | 118.1 (3) | N9   | C117 | C118 | 178.5 (5)  |
| C61  | N5   | C59  | 105.8 (3) | N10  | C120 | C121 | 171.3 (15) |
| C61  | N6   | C60  | 108.5 (3) |      |      |      |            |

**Table S-5** Selected Torsion Angles

| A   | B   | C   | D   | Angle/°    | A   | B   | C   | D   | Angle/°    |
|-----|-----|-----|-----|------------|-----|-----|-----|-----|------------|
| Br1 | C7  | C8  | C9  | 177.8 (3)  | Br5 | C65 | C66 | C67 | 179.1 (3)  |
| Br2 | C13 | C14 | C15 | 177.7 (3)  | Br6 | C71 | C72 | C73 | 178.6 (3)  |
| N1  | C1  | C2  | N2  | 0.6 (4)    | N5  | C59 | C60 | N6  | 1.7 (4)    |
| N1  | C1  | C2  | C10 | 179.8 (3)  | N5  | C59 | C60 | C68 | -171.3 (3) |
| N1  | C1  | C4  | C5  | -23.3 (5)  | N5  | C59 | C62 | C63 | 30.1 (5)   |
| N1  | C1  | C4  | C9  | 155.1 (3)  | N5  | C59 | C62 | C67 | -148.2 (3) |
| N1  | C3  | C16 | C17 | -112.9 (4) | N5  | C61 | C74 | C75 | 111.1 (4)  |
| N1  | C3  | C16 | C29 | 64.1 (5)   | N5  | C61 | C74 | C87 | -70.5 (4)  |
| N2  | C2  | C10 | C11 | 125.5 (4)  | N6  | C60 | C68 | C69 | -146.7 (3) |
| N2  | C2  | C10 | C15 | -56.6 (5)  | N6  | C60 | C68 | C73 | 28.0 (5)   |
| N2  | C3  | C16 | C17 | 74.0 (5)   | N6  | C61 | C74 | C75 | -79.9 (4)  |
| N2  | C3  | C16 | C29 | -109.0 (4) | N6  | C61 | C74 | C87 | 98.4 (4)   |
| C1  | N1  | C3  | N2  | 1.3 (4)    | C59 | N5  | C61 | N6  | -0.6 (4)   |
| C1  | N1  | C3  | C16 | -172.7 (3) | C59 | N5  | C61 | C74 | 169.5 (3)  |



| <b>A</b> | <b>B</b> | <b>C</b> | <b>D</b> | <b>Angle/°</b> | <b>A</b> | <b>B</b> | <b>C</b> | <b>D</b> | <b>Angle/°</b> |
|----------|----------|----------|----------|----------------|----------|----------|----------|----------|----------------|
| C1       | C2       | C10      | C11      | -53.7 (5)      | C59      | C60      | C68      | C69      | 25.4 (6)       |
| C1       | C2       | C10      | C15      | 124.3 (4)      | C59      | C60      | C68      | C73      | -159.9 (4)     |
| C1       | C4       | C5       | C6       | 177.8 (3)      | C59      | C62      | C63      | C64      | -179.2 (3)     |
| C1       | C4       | C9       | C8       | -177.4 (3)     | C59      | C62      | C67      | C66      | -179.4 (3)     |
| C2       | N2       | C3       | N1       | -0.9 (4)       | C60      | N6       | C61      | N5       | 1.7 (4)        |
| C2       | N2       | C3       | C16      | 172.9 (3)      | C60      | N6       | C61      | C74      | -168.8 (3)     |
| C2       | C1       | C4       | C5       | 158.2 (4)      | C60      | C59      | C62      | C63      | -153.3 (4)     |
| C2       | C1       | C4       | C9       | -23.4 (6)      | C60      | C59      | C62      | C67      | 28.5 (6)       |
| C2       | C10      | C11      | C12      | 177.2 (3)      | C60      | C68      | C69      | C70      | 174.7 (3)      |
| C2       | C10      | C15      | C14      | -177.6 (3)     | C60      | C68      | C73      | C72      | -172.7 (3)     |
| C3       | N1       | C1       | C2       | -1.1 (4)       | C61      | N5       | C59      | C60      | -0.7 (4)       |
| C3       | N1       | C1       | C4       | -180.0 (3)     | C61      | N5       | C59      | C62      | 176.6 (3)      |
| C3       | N2       | C2       | C1       | 0.2 (4)        | C61      | N6       | C60      | C59      | -2.0 (4)       |
| C3       | N2       | C2       | C10      | -179.1 (3)     | C61      | N6       | C60      | C68      | 172.1 (3)      |
| C3       | C16      | C17      | C18      | 6.3 (5)        | C61      | C74      | C75      | C76      | -3.6 (5)       |
| C3       | C16      | C17      | C22      | -177.6 (3)     | C61      | C74      | C75      | C80      | 177.2 (3)      |
| C3       | C16      | C29      | C24      | -179.7 (3)     | C61      | C74      | C87      | C82      | 179.8 (3)      |
| C3       | C16      | C29      | C28      | 0.5 (5)        | C61      | C74      | C87      | C86      | -1.1 (5)       |
| C4       | C1       | C2       | N2       | 179.2 (3)      | C62      | C59      | C60      | N6       | -175.2 (3)     |
| C4       | C1       | C2       | C10      | -1.5 (6)       | C62      | C59      | C60      | C68      | 11.8 (7)       |
| C4       | C5       | C6       | C7       | -0.3 (6)       | C62      | C63      | C64      | C65      | -0.9 (6)       |
| C5       | C4       | C9       | C8       | 1.1 (5)        | C63      | C62      | C67      | C66      | 2.4 (5)        |
| C5       | C6       | C7       | Br1      | -177.5 (3)     | C63      | C64      | C65      | Br5      | -177.7 (3)     |
| C5       | C6       | C7       | C8       | 1.0 (6)        | C63      | C64      | C65      | C66      | 1.4 (6)        |
| C6       | C7       | C8       | C9       | -0.6 (5)       | C64      | C65      | C66      | C67      | 0.0 (6)        |
| C7       | C8       | C9       | C4       | -0.4 (5)       | C65      | C66      | C67      | C62      | -1.9 (6)       |
| C9       | C4       | C5       | C6       | -0.7 (5)       | C67      | C62      | C63      | C64      | -0.9 (6)       |
| C10      | C11      | C12      | C13      | 0.2 (5)        | C68      | C69      | C70      | C71      | -2.1 (6)       |
| C11      | C10      | C15      | C14      | 0.3 (5)        | C69      | C68      | C73      | C72      | 2.2 (5)        |
| C11      | C12      | C13      | Br2      | -178.1 (3)     | C69      | C70      | C71      | Br6      | -176.6 (3)     |
| C11      | C12      | C13      | C14      | 0.9 (6)        | C69      | C70      | C71      | C72      | 2.4 (6)        |
| C12      | C13      | C14      | C15      | -1.3 (6)       | C70      | C71      | C72      | C73      | -0.5 (6)       |
| C13      | C14      | C15      | C10      | 0.6 (6)        | C71      | C72      | C73      | C68      | -1.9 (5)       |
| C15      | C10      | C11      | C12      | -0.7 (5)       | C73      | C68      | C69      | C70      | -0.2 (6)       |
| C16      | C17      | C18      | C19      | 178.9 (3)      | C74      | C75      | C76      | C77      | -178.8 (3)     |
| C16      | C17      | C22      | C21      | -180.0 (3)     | C74      | C75      | C80      | C79      | -178.6 (3)     |
| C16      | C17      | C22      | C23      | -3.6 (5)       | C74      | C75      | C80      | C81      | 2.6 (5)        |
| C17      | C16      | C29      | C24      | -2.7 (5)       | C75      | C74      | C87      | C82      | -1.9 (5)       |
| C17      | C16      | C29      | C28      | 177.5 (3)      | C75      | C74      | C87      | C86      | 177.3 (3)      |
| C17      | C18      | C19      | C20      | 0.0 (6)        | C75      | C76      | C77      | C78      | -2.3 (5)       |
| C17      | C22      | C23      | C24      | -1.1 (6)       | C75      | C80      | C81      | C82      | -1.1 (5)       |

| <b>A</b> | <b>B</b> | <b>C</b> | <b>D</b> | <b>Angle/°</b> | <b>A</b> | <b>B</b> | <b>C</b> | <b>D</b> | <b>Angle/°</b> |
|----------|----------|----------|----------|----------------|----------|----------|----------|----------|----------------|
| C18      | C17      | C22      | C21      | -3.7 (5)       | C76      | C75      | C80      | C79      | 2.2 (5)        |
| C18      | C17      | C22      | C23      | 172.6 (3)      | C76      | C75      | C80      | C81      | -176.6 (3)     |
| C18      | C19      | C20      | C21      | -1.9 (6)       | C76      | C77      | C78      | C79      | 1.6 (6)        |
| C19      | C20      | C21      | C22      | 0.8 (7)        | C77      | C78      | C79      | C80      | 1.0 (6)        |
| C20      | C21      | C22      | C17      | 2.0 (6)        | C78      | C79      | C80      | C75      | -2.9 (5)       |
| C20      | C21      | C22      | C23      | -174.2 (4)     | C78      | C79      | C80      | C81      | 175.9 (3)      |
| C21      | C22      | C23      | C24      | 175.0 (4)      | C79      | C80      | C81      | C82      | -179.8 (3)     |
| C22      | C17      | C18      | C19      | 2.8 (5)        | C80      | C75      | C76      | C77      | 0.4 (5)        |
| C22      | C23      | C24      | C25      | -174.9 (4)     | C80      | C81      | C82      | C83      | 179.5 (3)      |
| C22      | C23      | C24      | C29      | 4.0 (5)        | C80      | C81      | C82      | C87      | -1.9 (5)       |
| C23      | C24      | C25      | C26      | 178.9 (4)      | C81      | C82      | C83      | C84      | 178.2 (4)      |
| C23      | C24      | C29      | C16      | -2.0 (5)       | C81      | C82      | C87      | C74      | 3.4 (5)        |
| C23      | C24      | C29      | C28      | 177.8 (3)      | C81      | C82      | C87      | C86      | -175.8 (3)     |
| C24      | C25      | C26      | C27      | 2.7 (6)        | C82      | C83      | C84      | C85      | -2.1 (6)       |
| C25      | C24      | C29      | C16      | 176.9 (3)      | C83      | C82      | C87      | C74      | -177.9 (3)     |
| C25      | C24      | C29      | C28      | -3.3 (5)       | C83      | C82      | C87      | C86      | 2.9 (5)        |
| C25      | C26      | C27      | C28      | -2.1 (7)       | C83      | C84      | C85      | C86      | 2.3 (7)        |
| C26      | C27      | C28      | C29      | -1.3 (6)       | C84      | C85      | C86      | C87      | 0.2 (6)        |
| C27      | C28      | C29      | C16      | -176.3 (4)     | C85      | C86      | C87      | C74      | 178.1 (3)      |
| C27      | C28      | C29      | C24      | 3.9 (5)        | C85      | C86      | C87      | C82      | -2.8 (5)       |
| C29      | C16      | C17      | C18      | -170.6 (3)     | C87      | C74      | C75      | C76      | 178.1 (3)      |
| C29      | C16      | C17      | C22      | 5.5 (5)        | C87      | C74      | C75      | C80      | -1.1 (5)       |
| C29      | C24      | C25      | C26      | 0.0 (6)        | C87      | C82      | C83      | C84      | -0.5 (6)       |
| Br3      | C36      | C37      | C38      | 176.8 (3)      | Br7      | C94      | C95      | C96      | -179.7 (2)     |
| Br4      | C42      | C43      | C44      | 176.7 (3)      | Br8      | C100     | C101     | C102     | -178.8 (3)     |
| N3       | C30      | C31      | N4       | 2.1 (4)        | N7       | C88      | C89      | N8       | 0.7 (3)        |
| N3       | C30      | C31      | C39      | -173.5 (3)     | N7       | C88      | C89      | C97      | 176.9 (3)      |
| N3       | C30      | C33      | C34      | 35.7 (5)       | N7       | C88      | C91      | C92      | -75.2 (4)      |
| N3       | C30      | C33      | C38      | -139.7 (3)     | N7       | C88      | C91      | C96      | 102.7 (4)      |
| N3       | C32      | C45      | C46      | 101.6 (4)      | N7       | C90      | C103     | C104     | 117.7 (4)      |
| N3       | C32      | C45      | C58      | -74.4 (4)      | N7       | C90      | C103     | C116     | -60.9 (4)      |
| N4       | C31      | C39      | C40      | -134.6 (4)     | N8       | C89      | C97      | C98      | -154.4 (3)     |
| N4       | C31      | C39      | C44      | 44.7 (5)       | N8       | C89      | C97      | C102     | 26.2 (5)       |
| N4       | C32      | C45      | C46      | -73.5 (4)      | N8       | C90      | C103     | C104     | -61.9 (4)      |
| N4       | C32      | C45      | C58      | 110.5 (4)      | N8       | C90      | C103     | C116     | 119.6 (3)      |
| C30      | N3       | C32      | N4       | 1.0 (4)        | C88      | N7       | C90      | N8       | -1.0 (3)       |
| C30      | N3       | C32      | C45      | -174.7 (3)     | C88      | N7       | C90      | C103     | 179.4 (3)      |
| C30      | C31      | C39      | C40      | 40.2 (5)       | C88      | C89      | C97      | C98      | 30.0 (5)       |
| C30      | C31      | C39      | C44      | -140.4 (4)     | C88      | C89      | C97      | C102     | -149.5 (4)     |
| C30      | C33      | C34      | C35      | -176.7 (3)     | C88      | C91      | C92      | C93      | 178.7 (3)      |
| C30      | C33      | C38      | C37      | 177.2 (3)      | C88      | C91      | C96      | C95      | -177.5 (3)     |

| <b>A</b> | <b>B</b> | <b>C</b> | <b>D</b> | <b>Angle/°</b> | <b>A</b> | <b>B</b> | <b>C</b> | <b>D</b> | <b>Angle/°</b> |
|----------|----------|----------|----------|----------------|----------|----------|----------|----------|----------------|
| C31      | N4       | C32      | N3       | 0.3(4)         | C89      | N8       | C90      | N7       | 1.4(4)         |
| C31      | N4       | C32      | C45      | 175.9(3)       | C89      | N8       | C90      | C103     | -178.9(3)      |
| C31      | C30      | C33      | C34      | -150.0(4)      | C89      | C88      | C91      | C92      | 97.7(4)        |
| C31      | C30      | C33      | C38      | 34.5(5)        | C89      | C88      | C91      | C96      | -84.4(4)       |
| C31      | C39      | C40      | C41      | 178.6(3)       | C89      | C97      | C98      | C99      | -179.4(3)      |
| C31      | C39      | C44      | C43      | -177.3(3)      | C89      | C97      | C102     | C101     | -178.7(3)      |
| C32      | N3       | C30      | C31      | -1.9(4)        | C90      | N7       | C88      | C89      | 0.2(3)         |
| C32      | N3       | C30      | C33      | 173.4(3)       | C90      | N7       | C88      | C91      | 174.3(3)       |
| C32      | N4       | C31      | C30      | -1.5(4)        | C90      | N8       | C89      | C88      | -1.3(3)        |
| C32      | N4       | C31      | C39      | 174.5(3)       | C90      | N8       | C89      | C97      | -178.0(3)      |
| C32      | C45      | C46      | C47      | 1.1(5)         | C90      | C103     | C104     | C105     | -6.0(5)        |
| C32      | C45      | C46      | C51      | -176.3(3)      | C90      | C103     | C104     | C109     | 177.4(3)       |
| C32      | C45      | C58      | C53      | 177.4(3)       | C90      | C103     | C116     | C111     | 180.0(3)       |
| C32      | C45      | C58      | C57      | -4.0(5)        | C90      | C103     | C116     | C115     | 0.5(5)         |
| C33      | C30      | C31      | N4       | -172.6(3)      | C91      | C88      | C89      | N8       | -172.8(3)      |
| C33      | C30      | C31      | C39      | 11.8(6)        | C91      | C88      | C89      | C97      | 3.4(6)         |
| C33      | C34      | C35      | C36      | -0.6(5)        | C91      | C92      | C93      | C94      | -1.4(5)        |
| C34      | C33      | C38      | C37      | 1.8(5)         | C92      | C91      | C96      | C95      | 0.5(5)         |
| C34      | C35      | C36      | Br3      | -176.2(3)      | C92      | C93      | C94      | Br7      | -179.2(3)      |
| C34      | C35      | C36      | C37      | 1.9(6)         | C92      | C93      | C94      | C95      | 1.0(5)         |
| C35      | C36      | C37      | C38      | -1.4(6)        | C93      | C94      | C95      | C96      | 0.1(5)         |
| C36      | C37      | C38      | C33      | -0.5(5)        | C94      | C95      | C96      | C91      | -0.9(5)        |
| C38      | C33      | C34      | C35      | -1.2(5)        | C96      | C91      | C92      | C93      | 0.6(5)         |
| C39      | C40      | C41      | C42      | -1.0(6)        | C97      | C98      | C99      | C100     | -1.6(6)        |
| C40      | C39      | C44      | C43      | 2.0(5)         | C98      | C97      | C102     | C101     | 1.8(5)         |
| C40      | C41      | C42      | Br4      | -175.4(3)      | C98      | C99      | C100     | Br8      | -179.4(3)      |
| C40      | C41      | C42      | C43      | 1.6(6)         | C98      | C99      | C100     | C101     | 1.4(6)         |
| C41      | C42      | C43      | C44      | -0.4(5)        | C99      | C100     | C101     | C102     | 0.4(5)         |
| C42      | C43      | C44      | C39      | -1.5(5)        | C100     | C101     | C102     | C97      | -2.0(5)        |
| C44      | C39      | C40      | C41      | -0.8(5)        | C102     | C97      | C98      | C99      | 0.0(5)         |
| C45      | C46      | C47      | C48      | -179.0(3)      | C103     | C104     | C105     | C106     | -177.4(3)      |
| C45      | C46      | C51      | C50      | 179.5(3)       | C103     | C104     | C109     | C108     | -179.9(3)      |
| C45      | C46      | C51      | C52      | -0.5(5)        | C103     | C104     | C109     | C110     | 2.7(5)         |
| C46      | C45      | C58      | C53      | 1.5(5)         | C104     | C103     | C116     | C111     | 1.4(5)         |
| C46      | C45      | C58      | C57      | -179.9(3)      | C104     | C103     | C116     | C115     | -178.1(3)      |
| C46      | C47      | C48      | C49      | -0.2(5)        | C104     | C105     | C106     | C107     | -1.7(5)        |
| C46      | C51      | C52      | C53      | 0.0(5)         | C104     | C109     | C110     | C111     | 1.5(5)         |
| C47      | C46      | C51      | C50      | 2.0(5)         | C105     | C104     | C109     | C108     | 3.4(5)         |
| C47      | C46      | C51      | C52      | -178.0(3)      | C105     | C104     | C109     | C110     | -174.1(3)      |
| C47      | C48      | C49      | C50      | 1.6(6)         | C105     | C106     | C107     | C108     | 1.7(5)         |
| C48      | C49      | C50      | C51      | -1.2(6)        | C106     | C107     | C108     | C109     | 1.0(6)         |

| A   | B   | C   | D   | Angle/°    | A    | B    | C    | D    | Angle/°    |
|-----|-----|-----|-----|------------|------|------|------|------|------------|
| C49 | C50 | C51 | C46 | -0.7 (6)   | C107 | C108 | C109 | C104 | -3.5 (5)   |
| C49 | C50 | C51 | C52 | 179.4 (4)  | C107 | C108 | C109 | C110 | 173.9 (4)  |
| C50 | C51 | C52 | C53 | 180.0 (4)  | C108 | C109 | C110 | C111 | -175.9 (3) |
| C51 | C46 | C47 | C48 | -1.6 (5)   | C109 | C104 | C105 | C106 | -0.9 (5)   |
| C51 | C52 | C53 | C54 | -177.7 (4) | C109 | C110 | C111 | C112 | 175.2 (3)  |
| C51 | C52 | C53 | C58 | 1.2 (6)    | C109 | C110 | C111 | C116 | -4.2 (5)   |
| C52 | C53 | C54 | C55 | 179.3 (4)  | C110 | C111 | C112 | C113 | -179.5 (4) |
| C52 | C53 | C58 | C45 | -2.0 (5)   | C110 | C111 | C116 | C103 | 2.7 (5)    |
| C52 | C53 | C58 | C57 | 179.4 (3)  | C110 | C111 | C116 | C115 | -177.8 (3) |
| C53 | C54 | C55 | C56 | 1.8 (6)    | C111 | C112 | C113 | C114 | -1.8 (6)   |
| C54 | C53 | C58 | C45 | 177.0 (3)  | C112 | C111 | C116 | C103 | -176.7 (3) |
| C54 | C53 | C58 | C57 | -1.7 (5)   | C112 | C111 | C116 | C115 | 2.8 (5)    |
| C54 | C55 | C56 | C57 | -2.8 (6)   | C112 | C113 | C114 | C115 | 0.7 (6)    |
| C55 | C56 | C57 | C58 | 1.5 (6)    | C113 | C114 | C115 | C116 | 2.2 (5)    |
| C56 | C57 | C58 | C45 | -177.9 (3) | C114 | C115 | C116 | C103 | 175.6 (3)  |
| C56 | C57 | C58 | C53 | 0.7 (5)    | C114 | C115 | C116 | C111 | -3.9 (5)   |
| C58 | C45 | C46 | C47 | 177.1 (3)  | C116 | C103 | C104 | C105 | 172.5 (3)  |
| C58 | C45 | C46 | C51 | -0.3 (5)   | C116 | C103 | C104 | C109 | -4.1 (5)   |
| C58 | C53 | C54 | C55 | 0.4 (6)    | C116 | C111 | C112 | C113 | -0.1 (5)   |

**Table 6** Hydrogen Bonds

| D  | H   | A               | d(D-H)/Å | d(H-A)/Å | d(D-A)/Å  | D-H-A/° |
|----|-----|-----------------|----------|----------|-----------|---------|
| N2 | H2  | N3              | 0.91 (5) | 2.01 (5) | 2.898 (4) | 164 (4) |
| N4 | H4  | N5              | 0.79 (5) | 2.13 (5) | 2.917 (4) | 173 (5) |
| N6 | H6A | N7              | 0.84 (5) | 2.09 (5) | 2.916 (4) | 171 (5) |
| N8 | H8  | N1 <sup>1</sup> | 0.80 (4) | 2.20 (4) | 2.982 (4) | 166 (4) |

<sup>1</sup>1+X,-1+Y,+Z

## 6.2 Crystallographic Data and Detailed Refinements for **5b**

**Table S-7** Crystal data and structure refinement

|                     |                                                               |
|---------------------|---------------------------------------------------------------|
| Identification code | AM-TBA                                                        |
| Empirical formula   | C <sub>45</sub> H <sub>28</sub> N <sub>2</sub> S <sub>2</sub> |
| Formula weight      | 660.81                                                        |
| Temperature/K       | 100(2)                                                        |

|                                                      |                                                                               |
|------------------------------------------------------|-------------------------------------------------------------------------------|
| Crystal system                                       | triclinic                                                                     |
| Space group                                          | <i>P</i> -1                                                                   |
| <i>a</i> /Å                                          | 11.57220(10)                                                                  |
| <i>b</i> /Å                                          | 13.9231(2)                                                                    |
| <i>c</i> /Å                                          | 24.5599(3)                                                                    |
| $\alpha$ /°                                          | 91.4770(10)                                                                   |
| $\beta$ /°                                           | 94.0740(10)                                                                   |
| $\gamma$ /°                                          | 99.8870(10)                                                                   |
| Volume/Å <sup>3</sup>                                | 3885.59(8)                                                                    |
| <i>Z</i>                                             | 4                                                                             |
| $\rho_{\text{calc}}$ /cm <sup>3</sup>                | 1.130                                                                         |
| $\mu$ /mm <sup>-1</sup>                              | 1.477                                                                         |
| <i>F</i> (000)                                       | 1376.0                                                                        |
| Crystal size/mm <sup>3</sup>                         | 0.149 × 0.094 × 0.055                                                         |
| Radiation                                            | Cu <i>K</i> α ( $\lambda$ = 1.54184)                                          |
| 2 $\theta$ range for data collection/°               | 6.448 to 158.748                                                              |
| Index ranges                                         | -14 ≤ <i>h</i> ≤ 14, -17 ≤ <i>k</i> ≤ 17, -30 ≤ <i>l</i> ≤ 31                 |
| Reflections collected                                | 96398                                                                         |
| Independent reflections                              | 16607 [ <i>R</i> <sub>int</sub> = 0.0426, <i>R</i> <sub>sigma</sub> = 0.0276] |
| Data/restraints/parameters                           | 16607/0/891                                                                   |
| Goodness-of-fit on <i>F</i> <sup>2</sup>             | 1.065                                                                         |
| Final <i>R</i> indexes [ <i>I</i> >= 2σ( <i>I</i> )] | <i>R</i> <sub>1</sub> = 0.0432, <i>wR</i> <sub>2</sub> = 0.1043               |
| Final <i>R</i> indexes [all data]                    | <i>R</i> <sub>1</sub> = 0.0481, <i>wR</i> <sub>2</sub> = 0.1070               |
| Largest diff. peak/hole / e Å <sup>-3</sup>          | 0.56/-0.49                                                                    |

**Table S-8** Fractional Atomic Coordinates (×10<sup>4</sup>) and Equivalent Isotropic Displacement Parameters

(Å<sup>2</sup>×10<sup>3</sup>). *U*<sub>eq</sub> is defined as 1/3 of the trace of the orthogonalized *U*<sub>ij</sub> tensor.

| Atom | <i>x</i>    | <i>y</i>    | <i>z</i>   | <i>U</i> (eq) |
|------|-------------|-------------|------------|---------------|
| S1   | 11787.9 (3) | 3462.1 (3)  | 4519.0 (2) | 25.99 (9)     |
| S2   | 3637.5 (4)  | -4196.4 (3) | 3683.8 (2) | 28.00 (9)     |
| N1   | 5922.5 (12) | 2461.3 (10) | 1893.6 (5) | 19.6 (3)      |
| N2   | 4295.2 (12) | 1365.1 (10) | 1785.4 (5) | 20.4 (3)      |
| C1   | 6024.8 (13) | 1800.8 (11) | 2296.9 (6) | 19.1 (3)      |
| C2   | 5005.0 (14) | 1113.1 (11) | 2219.5 (6) | 19.5 (3)      |
| C3   | 4879.6 (14) | 2178.3 (11) | 1601.6 (6) | 20.1 (3)      |
| C4   | 7008.3 (14) | 1972.7 (11) | 2718.9 (6) | 19.5 (3)      |
| C5   | 6857.7 (14) | 1671.8 (12) | 3250.8 (7) | 22.8 (3)      |
| C6   | 7752.1 (14) | 1913.7 (12) | 3663.6 (7) | 23.1 (3)      |
| C7   | 8825.0 (14) | 2481.9 (11) | 3561.6 (7) | 20.9 (3)      |

| Atom | <i>x</i>     | <i>y</i>     | <i>z</i>   | U(eq)     |
|------|--------------|--------------|------------|-----------|
| C8   | 8992.7 (14)  | 2747.4 (12)  | 3023.7 (7) | 22.4 (3)  |
| C9   | 8102.9 (14)  | 2497.3 (11)  | 2608.9 (7) | 21.4 (3)  |
| C10  | 10916.2 (14) | 2930.6 (12)  | 3951.9 (7) | 23.9 (3)  |
| C11  | 9740.3 (14)  | 2844.2 (11)  | 4006.7 (7) | 21.5 (3)  |
| C12  | 9508.2 (14)  | 3213.3 (11)  | 4537.3 (7) | 22.3 (3)  |
| C13  | 8436.5 (15)  | 3290.7 (12)  | 4755.8 (7) | 24.9 (3)  |
| C14  | 8438.4 (16)  | 3698.4 (13)  | 5273.8 (7) | 27.9 (4)  |
| C15  | 9493.6 (17)  | 4054.0 (13)  | 5587.0 (7) | 29.3 (4)  |
| C16  | 10557.5 (16) | 4004.7 (12)  | 5381.8 (7) | 27.2 (4)  |
| C17  | 10557.7 (14) | 3580.2 (12)  | 4860.4 (7) | 23.9 (3)  |
| C18  | 4641.4 (14)  | 203.3 (11)   | 2502.2 (6) | 20.3 (3)  |
| C19  | 3474.3 (14)  | -88.0 (12)   | 2620.3 (7) | 24.4 (3)  |
| C20  | 3114.8 (15)  | -972.9 (12)  | 2856.9 (7) | 25.7 (3)  |
| C21  | 3904.0 (14)  | -1612.0 (11) | 2965.5 (7) | 22.0 (3)  |
| C22  | 5076.0 (14)  | -1314.6 (12) | 2850.1 (7) | 21.9 (3)  |
| C23  | 5441.1 (14)  | -417.5 (11)  | 2629.3 (6) | 20.8 (3)  |
| C24  | 4201.3 (15)  | -3002.9 (12) | 3551.7 (7) | 26.5 (3)  |
| C25  | 3533.7 (14)  | -2590.5 (12) | 3178.7 (7) | 23.2 (3)  |
| C26  | 2477.2 (14)  | -3265.5 (11) | 2985.9 (7) | 21.5 (3)  |
| C27  | 1575.5 (14)  | -3150.1 (12) | 2592.2 (7) | 23.3 (3)  |
| C28  | 648.4 (15)   | -3904.6 (12) | 2471.7 (7) | 25.9 (3)  |
| C29  | 594.9 (15)   | -4793.2 (13) | 2730.1 (7) | 27.7 (4)  |
| C30  | 1480.2 (15)  | -4939.7 (12) | 3108.9 (7) | 27.1 (3)  |
| C31  | 2419.3 (15)  | -4173.4 (12) | 3231.5 (7) | 23.3 (3)  |
| C32  | 4496.6 (14)  | 2745.8 (11)  | 1139.6 (6) | 21.1 (3)  |
| C33  | 5090.6 (14)  | 2773.3 (12)  | 657.9 (7)  | 22.5 (3)  |
| C34  | 5996.6 (15)  | 2217.0 (13)  | 576.9 (7)  | 25.6 (3)  |
| C35  | 6519.9 (16)  | 2230.0 (14)  | 98.2 (8)   | 30.8 (4)  |
| C36  | 6174.4 (17)  | 2805.5 (15)  | -337.7 (8) | 34.5 (4)  |
| C37  | 5330.1 (17)  | 3353.9 (14)  | -276.2 (7) | 32.5 (4)  |
| C38  | 4762.2 (15)  | 3365.7 (13)  | 222.3 (7)  | 26.1 (3)  |
| C39  | 3891.9 (16)  | 3924.4 (13)  | 292.2 (7)  | 29.3 (4)  |
| C40  | 3296.0 (15)  | 3900.4 (13)  | 767.2 (7)  | 26.4 (3)  |
| C41  | 2403.2 (17)  | 4474.7 (14)  | 841.3 (8)  | 33.9 (4)  |
| C42  | 1829.2 (18)  | 4440.2 (15)  | 1302.3 (9) | 36.6 (4)  |
| C43  | 2107.3 (17)  | 3826.3 (14)  | 1726.8 (8) | 34.0 (4)  |
| C44  | 2951.4 (16)  | 3268.2 (13)  | 1677.8 (7) | 28.8 (4)  |
| C45  | 3587.4 (14)  | 3285.5 (12)  | 1198.4 (7) | 23.2 (3)  |
| S3   | 11962.6 (4)  | 11359.7 (3)  | 5426.6 (2) | 27.21 (9) |
| S4   | 5123.1 (4)   | 3507.2 (3)   | 4879.3 (2) | 23.16 (8) |
| N3   | 9129.9 (12)  | 8435.0 (10)  | 2167.5 (5) | 19.5 (3)  |

| <b>Atom</b> | <b>x</b>     | <b>y</b>     | <b>z</b>   | <b>U(eq)</b> |
|-------------|--------------|--------------|------------|--------------|
| N4          | 7957.3 (11)  | 7005.9 (9)   | 2044.0 (5) | 19.7 (3)     |
| C46         | 9003.8 (13)  | 8068.4 (11)  | 2683.1 (6) | 18.6 (3)     |
| C47         | 8264.9 (13)  | 7178.9 (11)  | 2598.6 (6) | 18.3 (3)     |
| C48         | 8490.1 (13)  | 7777.5 (11)  | 1800.0 (6) | 18.6 (3)     |
| C49         | 9641.7 (13)  | 8580.6 (11)  | 3173.0 (6) | 19.6 (3)     |
| C50         | 10113.6 (14) | 8064.4 (11)  | 3589.0 (6) | 20.2 (3)     |
| C51         | 10722.8 (14) | 8548.4 (12)  | 4051.5 (6) | 21.1 (3)     |
| C52         | 10893.0 (14) | 9568.0 (11)  | 4112.0 (6) | 20.7 (3)     |
| C53         | 10420.1 (14) | 10081.3 (12) | 3693.5 (7) | 23.2 (3)     |
| C54         | 9803.1 (14)  | 9597.6 (12)  | 3232.7 (7) | 22.8 (3)     |
| C55         | 11148.9 (15) | 10892.9 (12) | 4834.0 (7) | 24.2 (3)     |
| C56         | 11494.2 (14) | 10094.7 (11) | 4611.6 (6) | 21.2 (3)     |
| C57         | 12488.0 (14) | 9831.4 (12)  | 4930.1 (6) | 22.2 (3)     |
| C58         | 13142.5 (15) | 9094.7 (12)  | 4838.0 (7) | 25.2 (3)     |
| C59         | 14080.4 (15) | 8998.2 (13)  | 5203.5 (8) | 29.2 (4)     |
| C60         | 14390.4 (15) | 9631.3 (14)  | 5664.5 (7) | 30.7 (4)     |
| C61         | 13776.2 (16) | 10368.5 (14) | 5762.4 (7) | 29.6 (4)     |
| C62         | 12831.3 (15) | 10469.8 (12) | 5393.3 (7) | 24.8 (3)     |
| C63         | 7751.5 (13)  | 6471.2 (11)  | 2987.7 (6) | 18.6 (3)     |
| C64         | 7597.1 (14)  | 5469.3 (11)  | 2860.4 (6) | 20.7 (3)     |
| C65         | 7016.4 (14)  | 4796.3 (11)  | 3198.3 (7) | 21.4 (3)     |
| C66         | 6563.2 (13)  | 5095.9 (11)  | 3674.0 (6) | 19.3 (3)     |
| C67         | 6762.0 (14)  | 6096.3 (11)  | 3812.8 (6) | 20.1 (3)     |
| C68         | 7345.5 (13)  | 6769.4 (11)  | 3474.8 (6) | 19.6 (3)     |
| C69         | 5996.0 (14)  | 4447.9 (12)  | 4574.8 (7) | 22.2 (3)     |
| C70         | 5890.1 (13)  | 4384.7 (11)  | 4021.2 (6) | 19.7 (3)     |
| C71         | 5036.3 (13)  | 3539.9 (11)  | 3816.3 (6) | 19.3 (3)     |
| C72         | 4606.6 (14)  | 3243.2 (12)  | 3278.9 (7) | 22.5 (3)     |
| C73         | 3783.0 (15)  | 2400.7 (12)  | 3183.0 (7) | 24.3 (3)     |
| C74         | 3363.8 (14)  | 1837.9 (12)  | 3615.9 (7) | 24.4 (3)     |
| C75         | 3733.4 (14)  | 2130.5 (12)  | 4149.8 (7) | 22.2 (3)     |
| C76         | 4561.6 (14)  | 2981.2 (11)  | 4243.5 (6) | 20.4 (3)     |
| C77         | 8349.4 (14)  | 7933.4 (11)  | 1205.7 (6) | 19.7 (3)     |
| C78         | 7474.5 (14)  | 8453.5 (11)  | 1012.9 (6) | 20.9 (3)     |
| C79         | 6737.1 (15)  | 8848.8 (12)  | 1368.0 (7) | 25.4 (3)     |
| C80         | 5922.6 (16)  | 9374.9 (14)  | 1169.6 (8) | 30.7 (4)     |
| C81         | 5785.4 (16)  | 9532.5 (14)  | 601.5 (8)  | 32.5 (4)     |
| C82         | 6447.5 (16)  | 9149.3 (14)  | 248.9 (7)  | 30.7 (4)     |
| C83         | 7312.3 (15)  | 8592.3 (13)  | 437.4 (7)  | 25.6 (3)     |
| C84         | 7989.5 (16)  | 8173.2 (15)  | 80.5 (7)   | 31.1 (4)     |
| C85         | 8850.7 (15)  | 7652.0 (14)  | 269.2 (7)  | 28.8 (4)     |

| Atom | <i>x</i>     | <i>y</i>    | <i>z</i>   | U(eq)    |
|------|--------------|-------------|------------|----------|
| C86  | 9549.2 (18)  | 7223.5 (16) | -94.1 (8)  | 37.8 (4) |
| C87  | 10418.7 (18) | 6757.5 (16) | 97.4 (9)   | 39.9 (5) |
| C88  | 10646.0 (17) | 6678.3 (14) | 667.1 (9)  | 34.3 (4) |
| C89  | 9986.8 (15)  | 7050.7 (13) | 1028.2 (8) | 27.6 (4) |
| C90  | 9053.6 (14)  | 7545.5 (12) | 846.2 (7)  | 22.5 (3) |

**Table S-9** Selected Bond Distances (Å)

| Atom | Atom | Length/Å    | Atom | Atom | Length/Å    |
|------|------|-------------|------|------|-------------|
| S1   | C10  | 1.7308 (17) | S3   | C55  | 1.7245 (17) |
| S1   | C17  | 1.7320 (18) | S3   | C62  | 1.7282 (19) |
| S2   | C24  | 1.7255 (17) | S4   | C69  | 1.7316 (16) |
| S2   | C31  | 1.7369 (17) | S4   | C76  | 1.7407 (16) |
| N1   | C1   | 1.3816 (19) | N3   | C46  | 1.3854 (19) |
| N1   | C3   | 1.351 (2)   | N3   | C48  | 1.353 (2)   |
| N2   | C2   | 1.389 (2)   | N4   | C47  | 1.3874 (19) |
| N2   | C3   | 1.323 (2)   | N4   | C48  | 1.323 (2)   |
| C1   | C2   | 1.384 (2)   | C46  | C47  | 1.380 (2)   |
| C1   | C4   | 1.467 (2)   | C46  | C49  | 1.466 (2)   |
| C2   | C18  | 1.472 (2)   | C47  | C63  | 1.472 (2)   |
| C3   | C32  | 1.484 (2)   | C48  | C77  | 1.483 (2)   |
| C4   | C5   | 1.396 (2)   | C49  | C50  | 1.397 (2)   |
| C4   | C9   | 1.397 (2)   | C49  | C54  | 1.399 (2)   |
| C5   | C6   | 1.388 (2)   | C50  | C51  | 1.387 (2)   |
| C6   | C7   | 1.395 (2)   | C51  | C52  | 1.402 (2)   |
| C7   | C8   | 1.399 (2)   | C52  | C53  | 1.400 (2)   |
| C7   | C11  | 1.482 (2)   | C52  | C56  | 1.478 (2)   |
| C8   | C9   | 1.389 (2)   | C53  | C54  | 1.388 (2)   |
| C10  | C11  | 1.362 (2)   | C55  | C56  | 1.358 (2)   |
| C11  | C12  | 1.448 (2)   | C56  | C57  | 1.449 (2)   |
| C12  | C13  | 1.405 (2)   | C57  | C58  | 1.399 (2)   |
| C12  | C17  | 1.412 (2)   | C57  | C62  | 1.416 (2)   |
| C13  | C14  | 1.379 (2)   | C58  | C59  | 1.385 (2)   |
| C14  | C15  | 1.403 (3)   | C59  | C60  | 1.404 (3)   |
| C15  | C16  | 1.375 (3)   | C60  | C61  | 1.371 (3)   |
| C16  | C17  | 1.397 (2)   | C61  | C62  | 1.399 (2)   |
| C18  | C19  | 1.395 (2)   | C63  | C64  | 1.400 (2)   |
| C18  | C23  | 1.396 (2)   | C63  | C68  | 1.395 (2)   |
| C19  | C20  | 1.387 (2)   | C64  | C65  | 1.386 (2)   |
| C20  | C21  | 1.398 (2)   | C65  | C66  | 1.397 (2)   |



| Atom | Atom | Length/Å  | Atom | Atom | Length/Å  |
|------|------|-----------|------|------|-----------|
| C21  | C22  | 1.400 (2) | C66  | C67  | 1.401 (2) |
| C21  | C25  | 1.477 (2) | C66  | C70  | 1.479 (2) |
| C22  | C23  | 1.385 (2) | C67  | C68  | 1.388 (2) |
| C24  | C25  | 1.358 (2) | C69  | C70  | 1.356 (2) |
| C25  | C26  | 1.450 (2) | C70  | C71  | 1.453 (2) |
| C26  | C27  | 1.404 (2) | C71  | C72  | 1.403 (2) |
| C26  | C31  | 1.408 (2) | C71  | C76  | 1.409 (2) |
| C27  | C28  | 1.376 (2) | C72  | C73  | 1.382 (2) |
| C28  | C29  | 1.399 (2) | C73  | C74  | 1.402 (2) |
| C29  | C30  | 1.379 (2) | C74  | C75  | 1.379 (2) |
| C30  | C31  | 1.396 (2) | C75  | C76  | 1.393 (2) |
| C32  | C33  | 1.408 (2) | C77  | C78  | 1.405 (2) |
| C32  | C45  | 1.407 (2) | C77  | C90  | 1.401 (2) |
| C33  | C34  | 1.428 (2) | C78  | C79  | 1.426 (2) |
| C33  | C38  | 1.437 (2) | C78  | C83  | 1.435 (2) |
| C34  | C35  | 1.359 (3) | C79  | C80  | 1.361 (2) |
| C35  | C36  | 1.429 (3) | C80  | C81  | 1.420 (3) |
| C36  | C37  | 1.353 (3) | C81  | C82  | 1.354 (3) |
| C37  | C38  | 1.431 (3) | C82  | C83  | 1.427 (2) |
| C38  | C39  | 1.391 (3) | C83  | C84  | 1.397 (3) |
| C39  | C40  | 1.395 (3) | C84  | C85  | 1.391 (3) |
| C40  | C41  | 1.429 (3) | C85  | C86  | 1.430 (3) |
| C40  | C45  | 1.436 (2) | C85  | C90  | 1.436 (2) |
| C41  | C42  | 1.351 (3) | C86  | C87  | 1.352 (3) |
| C42  | C43  | 1.419 (3) | C87  | C88  | 1.416 (3) |
| C43  | C44  | 1.358 (3) | C88  | C89  | 1.358 (3) |
| C44  | C45  | 1.431 (2) | C89  | C90  | 1.430 (2) |

**Table S-10** Selected Bond Angles

| Atom | Atom | Atom | Angle/°     | Atom | Atom | Atom | Angle/°     |
|------|------|------|-------------|------|------|------|-------------|
| C10  | S1   | C17  | 91.24 (8)   | C55  | S3   | C62  | 91.15 (8)   |
| C24  | S2   | C31  | 90.78 (8)   | C69  | S4   | C76  | 91.12 (8)   |
| C3   | N1   | C1   | 108.42 (13) | C48  | N3   | C46  | 108.03 (13) |
| C3   | N2   | C2   | 105.87 (13) | C48  | N4   | C47  | 106.05 (13) |
| N1   | C1   | C2   | 104.85 (13) | N3   | C46  | C49  | 121.88 (13) |
| N1   | C1   | C4   | 121.06 (14) | C47  | C46  | N3   | 105.17 (13) |
| C2   | C1   | C4   | 133.76 (14) | C47  | C46  | C49  | 132.84 (14) |
| N2   | C2   | C18  | 120.09 (14) | N4   | C47  | C63  | 119.32 (13) |
| C1   | C2   | N2   | 109.67 (13) | C46  | C47  | N4   | 109.58 (13) |

| Atom | Atom | Atom | Angle/°     | Atom | Atom | Atom | Angle/°     |
|------|------|------|-------------|------|------|------|-------------|
| C1   | C2   | C18  | 130.18 (14) | C46  | C47  | C63  | 131.02 (14) |
| N1   | C3   | C32  | 121.72 (14) | N3   | C48  | C77  | 124.10 (14) |
| N2   | C3   | N1   | 111.19 (13) | N4   | C48  | N3   | 111.18 (13) |
| N2   | C3   | C32  | 127.09 (14) | N4   | C48  | C77  | 124.63 (14) |
| C5   | C4   | C1   | 120.99 (14) | C50  | C49  | C46  | 120.74 (14) |
| C5   | C4   | C9   | 117.98 (14) | C50  | C49  | C54  | 118.40 (14) |
| C9   | C4   | C1   | 120.90 (14) | C54  | C49  | C46  | 120.85 (14) |
| C6   | C5   | C4   | 121.21 (15) | C51  | C50  | C49  | 120.82 (14) |
| C5   | C6   | C7   | 120.94 (15) | C50  | C51  | C52  | 121.01 (14) |
| C6   | C7   | C8   | 117.74 (15) | C51  | C52  | C56  | 121.86 (14) |
| C6   | C7   | C11  | 121.90 (15) | C53  | C52  | C51  | 117.91 (14) |
| C8   | C7   | C11  | 120.29 (14) | C53  | C52  | C56  | 120.14 (14) |
| C9   | C8   | C7   | 121.31 (15) | C54  | C53  | C52  | 121.12 (15) |
| C8   | C9   | C4   | 120.68 (15) | C53  | C54  | C49  | 120.73 (15) |
| C11  | C10  | S1   | 113.86 (13) | C56  | C55  | S3   | 114.19 (13) |
| C10  | C11  | C7   | 123.65 (15) | C55  | C56  | C52  | 122.78 (15) |
| C10  | C11  | C12  | 111.55 (15) | C55  | C56  | C57  | 111.58 (15) |
| C12  | C11  | C7   | 124.67 (14) | C57  | C56  | C52  | 125.63 (15) |
| C13  | C12  | C11  | 130.31 (15) | C58  | C57  | C56  | 130.46 (15) |
| C13  | C12  | C17  | 117.75 (16) | C58  | C57  | C62  | 118.12 (15) |
| C17  | C12  | C11  | 111.88 (15) | C62  | C57  | C56  | 111.38 (15) |
| C14  | C13  | C12  | 119.78 (15) | C59  | C58  | C57  | 119.62 (17) |
| C13  | C14  | C15  | 121.30 (17) | C58  | C59  | C60  | 121.10 (17) |
| C16  | C15  | C14  | 120.41 (17) | C61  | C60  | C59  | 120.70 (16) |
| C15  | C16  | C17  | 118.40 (16) | C60  | C61  | C62  | 118.33 (17) |
| C12  | C17  | S1   | 111.46 (13) | C57  | C62  | S3   | 111.70 (13) |
| C16  | C17  | S1   | 126.16 (13) | C61  | C62  | S3   | 126.18 (14) |
| C16  | C17  | C12  | 122.35 (16) | C61  | C62  | C57  | 122.11 (17) |
| C19  | C18  | C2   | 120.83 (14) | C64  | C63  | C47  | 120.15 (14) |
| C19  | C18  | C23  | 118.33 (14) | C68  | C63  | C47  | 121.71 (14) |
| C23  | C18  | C2   | 120.74 (14) | C68  | C63  | C64  | 118.04 (14) |
| C20  | C19  | C18  | 120.95 (15) | C65  | C64  | C63  | 120.87 (15) |
| C19  | C20  | C21  | 120.81 (15) | C64  | C65  | C66  | 121.13 (15) |
| C20  | C21  | C22  | 118.06 (15) | C65  | C66  | C67  | 117.88 (14) |
| C20  | C21  | C25  | 122.33 (15) | C65  | C66  | C70  | 121.37 (14) |
| C22  | C21  | C25  | 119.58 (14) | C67  | C66  | C70  | 120.75 (14) |
| C23  | C22  | C21  | 121.00 (15) | C68  | C67  | C66  | 120.88 (14) |
| C22  | C23  | C18  | 120.78 (15) | C67  | C68  | C63  | 121.07 (14) |
| C25  | C24  | S2   | 114.50 (13) | C70  | C69  | S4   | 114.02 (12) |
| C24  | C25  | C21  | 123.54 (15) | C69  | C70  | C66  | 123.61 (14) |
| C24  | C25  | C26  | 111.26 (15) | C69  | C70  | C71  | 111.65 (14) |

| Atom | Atom | Atom | Angle/°     | Atom | Atom | Atom | Angle/°     |
|------|------|------|-------------|------|------|------|-------------|
| C26  | C25  | C21  | 124.99 (15) | C71  | C70  | C66  | 124.74 (14) |
| C27  | C26  | C25  | 129.95 (15) | C72  | C71  | C70  | 130.16 (14) |
| C27  | C26  | C31  | 118.22 (15) | C72  | C71  | C76  | 117.92 (14) |
| C31  | C26  | C25  | 111.77 (14) | C76  | C71  | C70  | 111.87 (14) |
| C28  | C27  | C26  | 119.71 (15) | C73  | C72  | C71  | 119.73 (15) |
| C27  | C28  | C29  | 121.09 (16) | C72  | C73  | C74  | 120.95 (15) |
| C30  | C29  | C28  | 120.71 (16) | C75  | C74  | C73  | 120.71 (15) |
| C29  | C30  | C31  | 118.16 (15) | C74  | C75  | C76  | 118.00 (15) |
| C26  | C31  | S2   | 111.68 (12) | C71  | C76  | S4   | 111.32 (12) |
| C30  | C31  | S2   | 126.26 (13) | C75  | C76  | S4   | 126.09 (12) |
| C30  | C31  | C26  | 122.07 (15) | C75  | C76  | C71  | 122.58 (15) |
| C33  | C32  | C3   | 119.24 (14) | C78  | C77  | C48  | 118.38 (14) |
| C45  | C32  | C3   | 119.70 (15) | C90  | C77  | C48  | 120.42 (14) |
| C45  | C32  | C33  | 120.98 (15) | C90  | C77  | C78  | 121.18 (14) |
| C32  | C33  | C34  | 122.67 (15) | C77  | C78  | C79  | 122.47 (15) |
| C32  | C33  | C38  | 119.22 (15) | C77  | C78  | C83  | 118.97 (15) |
| C34  | C33  | C38  | 118.10 (15) | C79  | C78  | C83  | 118.56 (15) |
| C35  | C34  | C33  | 121.16 (16) | C80  | C79  | C78  | 120.94 (16) |
| C34  | C35  | C36  | 120.53 (17) | C79  | C80  | C81  | 120.34 (17) |
| C37  | C36  | C35  | 120.29 (17) | C82  | C81  | C80  | 120.59 (16) |
| C36  | C37  | C38  | 120.96 (17) | C81  | C82  | C83  | 121.13 (16) |
| C37  | C38  | C33  | 118.93 (16) | C82  | C83  | C78  | 118.40 (16) |
| C39  | C38  | C33  | 119.36 (16) | C84  | C83  | C78  | 119.41 (16) |
| C39  | C38  | C37  | 121.71 (16) | C84  | C83  | C82  | 122.18 (16) |
| C38  | C39  | C40  | 121.84 (16) | C85  | C84  | C83  | 121.76 (16) |
| C39  | C40  | C41  | 122.04 (16) | C84  | C85  | C86  | 122.01 (17) |
| C39  | C40  | C45  | 119.36 (16) | C84  | C85  | C90  | 119.17 (16) |
| C41  | C40  | C45  | 118.60 (16) | C86  | C85  | C90  | 118.81 (17) |
| C42  | C41  | C40  | 121.39 (17) | C87  | C86  | C85  | 121.24 (19) |
| C41  | C42  | C43  | 120.14 (17) | C86  | C87  | C88  | 120.06 (18) |
| C44  | C43  | C42  | 120.84 (18) | C89  | C88  | C87  | 120.92 (18) |
| C43  | C44  | C45  | 120.98 (17) | C88  | C89  | C90  | 121.16 (17) |
| C32  | C45  | C40  | 119.17 (15) | C77  | C90  | C85  | 119.42 (15) |
| C32  | C45  | C44  | 122.76 (15) | C77  | C90  | C89  | 122.84 (15) |
| C44  | C45  | C40  | 118.05 (15) | C89  | C90  | C85  | 117.74 (16) |

**Table S-11** Selected Torsion Angles

| <b>A</b> | <b>B</b> | <b>C</b> | <b>D</b> | <b>Angle/°</b> | <b>A</b> | <b>B</b> | <b>C</b> | <b>D</b> | <b>Angle/°</b> |
|----------|----------|----------|----------|----------------|----------|----------|----------|----------|----------------|
| S1       | C10      | C11      | C7       | 175.20 (12)    | S3       | C55      | C56      | C52      | 178.32 (12)    |
| S1       | C10      | C11      | C12      | -0.74 (17)     | S3       | C55      | C56      | C57      | -0.56 (18)     |
| S2       | C24      | C25      | C21      | -173.88 (13)   | S4       | C69      | C70      | C66      | -178.96 (12)   |
| S2       | C24      | C25      | C26      | 1.0 (2)        | S4       | C69      | C70      | C71      | 1.26 (18)      |
| N1       | C1       | C2       | N2       | -1.09 (17)     | N3       | C46      | C47      | N4       | 0.48 (17)      |
| N1       | C1       | C2       | C18      | 176.00 (16)    | N3       | C46      | C47      | C63      | -176.08 (15)   |
| N1       | C1       | C4       | C5       | 145.76 (16)    | N3       | C46      | C49      | C50      | -140.28 (16)   |
| N1       | C1       | C4       | C9       | -30.1 (2)      | N3       | C46      | C49      | C54      | 39.1 (2)       |
| N1       | C3       | C32      | C33      | 68.9 (2)       | N3       | C48      | C77      | C78      | -84.04 (19)    |
| N1       | C3       | C32      | C45      | -107.98 (18)   | N3       | C48      | C77      | C90      | 97.71 (19)     |
| N2       | C2       | C18      | C19      | -41.4 (2)      | N4       | C47      | C63      | C64      | 39.2 (2)       |
| N2       | C2       | C18      | C23      | 134.77 (16)    | N4       | C47      | C63      | C68      | -137.10 (15)   |
| N2       | C3       | C32      | C33      | -111.23 (19)   | N4       | C48      | C77      | C78      | 92.00 (19)     |
| N2       | C3       | C32      | C45      | 71.9 (2)       | N4       | C48      | C77      | C90      | -86.3 (2)      |
| C1       | N1       | C3       | N2       | -0.66 (18)     | C46      | N3       | C48      | N4       | -0.09 (18)     |
| C1       | N1       | C3       | C32      | 179.23 (14)    | C46      | N3       | C48      | C77      | 176.42 (14)    |
| C1       | C2       | C18      | C19      | 141.80 (18)    | C46      | C47      | C63      | C64      | -144.49 (17)   |
| C1       | C2       | C18      | C23      | -42.1 (3)      | C46      | C47      | C63      | C68      | 39.2 (2)       |
| C1       | C4       | C5       | C6       | -173.78 (15)   | C46      | C49      | C50      | C51      | 179.66 (14)    |
| C1       | C4       | C9       | C8       | 173.12 (15)    | C46      | C49      | C54      | C53      | -179.18 (15)   |
| C2       | N2       | C3       | N1       | -0.03 (18)     | C47      | N4       | C48      | N3       | 0.38 (17)      |
| C2       | N2       | C3       | C32      | -179.91 (16)   | C47      | N4       | C48      | C77      | -176.10 (14)   |
| C2       | C1       | C4       | C5       | -26.5 (3)      | C47      | C46      | C49      | C50      | 35.4 (3)       |
| C2       | C1       | C4       | C9       | 157.62 (17)    | C47      | C46      | C49      | C54      | -145.28 (18)   |
| C2       | C18      | C19      | C20      | 176.09 (16)    | C47      | C63      | C64      | C65      | -173.96 (14)   |
| C2       | C18      | C23      | C22      | -174.09 (15)   | C47      | C63      | C68      | C67      | 173.77 (14)    |
| C3       | N1       | C1       | C2       | 1.05 (17)      | C48      | N3       | C46      | C47      | -0.25 (17)     |
| C3       | N1       | C1       | C4       | -173.18 (14)   | C48      | N3       | C46      | C49      | 176.46 (14)    |
| C3       | N2       | C2       | C1       | 0.72 (18)      | C48      | N4       | C47      | C46      | -0.53 (17)     |
| C3       | N2       | C2       | C18      | -176.72 (14)   | C48      | N4       | C47      | C63      | 176.49 (14)    |
| C3       | C32      | C33      | C34      | 4.8 (2)        | C48      | C77      | C78      | C79      | 1.2 (2)        |
| C3       | C32      | C33      | C38      | -176.60 (14)   | C48      | C77      | C78      | C83      | -178.72 (14)   |
| C3       | C32      | C45      | C40      | 174.48 (15)    | C48      | C77      | C90      | C85      | 176.02 (15)    |
| C3       | C32      | C45      | C44      | -4.0 (2)       | C48      | C77      | C90      | C89      | -4.7 (2)       |
| C4       | C1       | C2       | N2       | 172.06 (16)    | C49      | C46      | C47      | N4       | -175.71 (16)   |
| C4       | C1       | C2       | C18      | -10.8 (3)      | C49      | C46      | C47      | C63      | 7.7 (3)        |
| C4       | C5       | C6       | C7       | 1.2 (3)        | C49      | C50      | C51      | C52      | -0.7 (2)       |
| C5       | C4       | C9       | C8       | -2.9 (2)       | C50      | C49      | C54      | C53      | 0.2 (2)        |
| C5       | C6       | C7       | C8       | -3.8 (2)       | C50      | C51      | C52      | C53      | 0.6 (2)        |

| <b>A</b> | <b>B</b> | <b>C</b> | <b>D</b> | <b>Angle/°</b> | <b>A</b> | <b>B</b> | <b>C</b> | <b>D</b> | <b>Angle/°</b> |
|----------|----------|----------|----------|----------------|----------|----------|----------|----------|----------------|
| C5       | C6       | C7       | C11      | 172.86 (15)    | C50      | C51      | C52      | C56      | 177.30 (15)    |
| C6       | C7       | C8       | C9       | 3.2 (2)        | C51      | C52      | C53      | C54      | -0.1 (2)       |
| C6       | C7       | C11      | C10      | 144.33 (17)    | C51      | C52      | C56      | C55      | -141.76 (17)   |
| C6       | C7       | C11      | C12      | -40.3 (2)      | C51      | C52      | C56      | C57      | 37.0 (2)       |
| C7       | C8       | C9       | C4       | 0.2 (2)        | C52      | C53      | C54      | C49      | -0.3 (3)       |
| C7       | C11      | C12      | C13      | 2.0 (3)        | C52      | C56      | C57      | C58      | 4.1 (3)        |
| C7       | C11      | C12      | C17      | -175.14 (14)   | C52      | C56      | C57      | C62      | -178.23 (14)   |
| C8       | C7       | C11      | C10      | -39.1 (2)      | C53      | C52      | C56      | C55      | 34.9 (2)       |
| C8       | C7       | C11      | C12      | 136.34 (16)    | C53      | C52      | C56      | C57      | -146.38 (16)   |
| C9       | C4       | C5       | C6       | 2.2 (2)        | C54      | C49      | C50      | C51      | 0.3 (2)        |
| C10      | S1       | C17      | C12      | 0.03 (12)      | C55      | S3       | C62      | C57      | 0.08 (13)      |
| C10      | S1       | C17      | C16      | -178.17 (15)   | C55      | S3       | C62      | C61      | 179.22 (16)    |
| C10      | C11      | C12      | C13      | 177.85 (16)    | C55      | C56      | C57      | C58      | -177.07 (16)   |
| C10      | C11      | C12      | C17      | 0.76 (19)      | C55      | C56      | C57      | C62      | 0.61 (19)      |
| C11      | C7       | C8       | C9       | -173.57 (15)   | C56      | C52      | C53      | C54      | -176.88 (15)   |
| C11      | C12      | C13      | C14      | -178.15 (16)   | C56      | C57      | C58      | C59      | 178.89 (16)    |
| C11      | C12      | C17      | S1       | -0.44 (17)     | C56      | C57      | C62      | S3       | -0.40 (17)     |
| C11      | C12      | C17      | C16      | 177.83 (15)    | C56      | C57      | C62      | C61      | -179.58 (15)   |
| C12      | C13      | C14      | C15      | 1.0 (3)        | C57      | C58      | C59      | C60      | -0.3 (3)       |
| C13      | C12      | C17      | S1       | -177.94 (12)   | C58      | C57      | C62      | S3       | 177.60 (12)    |
| C13      | C12      | C17      | C16      | 0.3 (2)        | C58      | C57      | C62      | C61      | -1.6 (2)       |
| C13      | C14      | C15      | C16      | 0.1 (3)        | C58      | C59      | C60      | C61      | -0.5 (3)       |
| C14      | C15      | C16      | C17      | -1.0 (3)       | C59      | C60      | C61      | C62      | 0.3 (3)        |
| C15      | C16      | C17      | S1       | 178.76 (13)    | C60      | C61      | C62      | S3       | -178.31 (13)   |
| C15      | C16      | C17      | C12      | 0.7 (2)        | C60      | C61      | C62      | C57      | 0.7 (2)        |
| C17      | S1       | C10      | C11      | 0.42 (13)      | C62      | S3       | C55      | C56      | 0.28 (14)      |
| C17      | C12      | C13      | C14      | -1.2 (2)       | C62      | C57      | C58      | C59      | 1.3 (2)        |
| C18      | C19      | C20      | C21      | -2.3 (3)       | C63      | C64      | C65      | C66      | 0.3 (2)        |
| C19      | C18      | C23      | C22      | 2.1 (2)        | C64      | C63      | C68      | C67      | -2.6 (2)       |
| C19      | C20      | C21      | C22      | 2.7 (3)        | C64      | C65      | C66      | C67      | -2.9 (2)       |
| C19      | C20      | C21      | C25      | -175.34 (16)   | C64      | C65      | C66      | C70      | 176.82 (15)    |
| C20      | C21      | C22      | C23      | -0.7 (2)       | C65      | C66      | C67      | C68      | 2.8 (2)        |
| C20      | C21      | C25      | C24      | -142.37 (19)   | C65      | C66      | C70      | C69      | 140.41 (17)    |
| C20      | C21      | C25      | C26      | 43.5 (3)       | C65      | C66      | C70      | C71      | -39.9 (2)      |
| C21      | C22      | C23      | C18      | -1.7 (2)       | C66      | C67      | C68      | C63      | 0.0 (2)        |
| C21      | C25      | C26      | C27      | -3.0 (3)       | C66      | C70      | C71      | C72      | -4.6 (3)       |
| C21      | C25      | C26      | C31      | 174.41 (16)    | C66      | C70      | C71      | C76      | 178.28 (14)    |
| C22      | C21      | C25      | C24      | 39.7 (3)       | C67      | C66      | C70      | C69      | -39.8 (2)      |
| C22      | C21      | C25      | C26      | -134.51 (17)   | C67      | C66      | C70      | C71      | 139.91 (16)    |
| C23      | C18      | C19      | C20      | -0.1 (3)       | C68      | C63      | C64      | C65      | 2.5 (2)        |
| C24      | S2       | C31      | C26      | 0.79 (14)      | C69      | S4       | C76      | C71      | -0.91 (12)     |

| <b>A</b> | <b>B</b> | <b>C</b> | <b>D</b> | <b>Angle/°</b> | <b>A</b> | <b>B</b> | <b>C</b> | <b>D</b> | <b>Angle/°</b> |
|----------|----------|----------|----------|----------------|----------|----------|----------|----------|----------------|
| C24      | S2       | C31      | C30      | -179.64 (17)   | C69      | S4       | C76      | C75      | -179.74 (15)   |
| C24      | C25      | C26      | C27      | -177.79 (17)   | C69      | C70      | C71      | C72      | 175.18 (16)    |
| C24      | C25      | C26      | C31      | -0.4 (2)       | C69      | C70      | C71      | C76      | -1.95 (19)     |
| C25      | C21      | C22      | C23      | 177.40 (15)    | C70      | C66      | C67      | C68      | -176.96 (14)   |
| C25      | C26      | C27      | C28      | 179.55 (17)    | C70      | C71      | C72      | C73      | -179.89 (16)   |
| C25      | C26      | C31      | S2       | -0.39 (18)     | C70      | C71      | C76      | S4       | 1.77 (17)      |
| C25      | C26      | C31      | C30      | -179.98 (16)   | C70      | C71      | C76      | C75      | -179.36 (14)   |
| C26      | C27      | C28      | C29      | -0.8 (3)       | C71      | C72      | C73      | C74      | 0.3 (2)        |
| C27      | C26      | C31      | S2       | 177.36 (12)    | C72      | C71      | C76      | S4       | -175.75 (12)   |
| C27      | C26      | C31      | C30      | -2.2 (2)       | C72      | C71      | C76      | C75      | 3.1 (2)        |
| C27      | C28      | C29      | C30      | -0.8 (3)       | C72      | C73      | C74      | C75      | 2.3 (3)        |
| C28      | C29      | C30      | C31      | 0.9 (3)        | C73      | C74      | C75      | C76      | -2.1 (2)       |
| C29      | C30      | C31      | S2       | -178.86 (14)   | C74      | C75      | C76      | S4       | 178.08 (13)    |
| C29      | C30      | C31      | C26      | 0.7 (3)        | C74      | C75      | C76      | C71      | -0.6 (2)       |
| C31      | S2       | C24      | C25      | -1.05 (15)     | C76      | S4       | C69      | C70      | -0.22 (13)     |
| C31      | C26      | C27      | C28      | 2.3 (2)        | C76      | C71      | C72      | C73      | -2.9 (2)       |
| C32      | C33      | C34      | C35      | 177.32 (16)    | C77      | C78      | C79      | C80      | 177.94 (16)    |
| C32      | C33      | C38      | C37      | -177.02 (16)   | C77      | C78      | C83      | C82      | -177.95 (15)   |
| C32      | C33      | C38      | C39      | 2.1 (2)        | C77      | C78      | C83      | C84      | 2.8 (2)        |
| C33      | C32      | C45      | C40      | -2.3 (2)       | C78      | C77      | C90      | C85      | -2.2 (2)       |
| C33      | C32      | C45      | C44      | 179.17 (16)    | C78      | C77      | C90      | C89      | 177.10 (15)    |
| C33      | C34      | C35      | C36      | 0.1 (3)        | C78      | C79      | C80      | C81      | 0.6 (3)        |
| C33      | C38      | C39      | C40      | -2.3 (3)       | C78      | C83      | C84      | C85      | -2.4 (3)       |
| C34      | C33      | C38      | C37      | 1.6 (2)        | C79      | C78      | C83      | C82      | 2.2 (2)        |
| C34      | C33      | C38      | C39      | -179.25 (16)   | C79      | C78      | C83      | C84      | -177.13 (16)   |
| C34      | C35      | C36      | C37      | 0.8 (3)        | C79      | C80      | C81      | C82      | 1.1 (3)        |
| C35      | C36      | C37      | C38      | -0.4 (3)       | C80      | C81      | C82      | C83      | -1.1 (3)       |
| C36      | C37      | C38      | C33      | -0.8 (3)       | C81      | C82      | C83      | C78      | -0.6 (3)       |
| C36      | C37      | C38      | C39      | -179.92 (18)   | C81      | C82      | C83      | C84      | 178.68 (18)    |
| C37      | C38      | C39      | C40      | 176.76 (17)    | C82      | C83      | C84      | C85      | 178.36 (18)    |
| C38      | C33      | C34      | C35      | -1.3 (2)       | C83      | C78      | C79      | C80      | -2.2 (3)       |
| C38      | C39      | C40      | C41      | 179.85 (18)    | C83      | C84      | C85      | C86      | -179.82 (18)   |
| C38      | C39      | C40      | C45      | 0.2 (3)        | C83      | C84      | C85      | C90      | -0.3 (3)       |
| C39      | C40      | C41      | C42      | 179.65 (19)    | C84      | C85      | C86      | C87      | 176.9 (2)      |
| C39      | C40      | C45      | C32      | 2.1 (2)        | C84      | C85      | C90      | C77      | 2.6 (3)        |
| C39      | C40      | C45      | C44      | -179.30 (16)   | C84      | C85      | C90      | C89      | -176.73 (16)   |
| C40      | C41      | C42      | C43      | 0.1 (3)        | C85      | C86      | C87      | C88      | 0.6 (3)        |
| C41      | C40      | C45      | C32      | -177.52 (16)   | C86      | C85      | C90      | C77      | -177.88 (16)   |
| C41      | C40      | C45      | C44      | 1.0 (2)        | C86      | C85      | C90      | C89      | 2.8 (2)        |
| C41      | C42      | C43      | C44      | 0.1 (3)        | C86      | C87      | C88      | C89      | 1.2 (3)        |
| C42      | C43      | C44      | C45      | 0.2 (3)        | C87      | C88      | C89      | C90      | -0.8 (3)       |

| A   | B   | C   | D   | Angle/°      | A   | B   | C   | D   | Angle/°     |
|-----|-----|-----|-----|--------------|-----|-----|-----|-----|-------------|
| C43 | C44 | C45 | C32 | 177.66 (17)  | C88 | C89 | C90 | C77 | 179.55 (16) |
| C43 | C44 | C45 | C40 | -0.8 (3)     | C88 | C89 | C90 | C85 | -1.2 (3)    |
| C45 | C32 | C33 | C34 | -178.35 (15) | C90 | C77 | C78 | C79 | 179.40 (15) |
| C45 | C32 | C33 | C38 | 0.2 (2)      | C90 | C77 | C78 | C83 | -0.5 (2)    |
| C45 | C40 | C41 | C42 | -0.7 (3)     | C90 | C85 | C86 | C87 | -2.6 (3)    |

### 6.3 Crystallographic Data and Detailed Refinements for **5b** solvate

**Table S-12** Crystal data and structure refinement

|                                                      |                                                                              |
|------------------------------------------------------|------------------------------------------------------------------------------|
| Identification code                                  | TBA                                                                          |
| Empirical formula                                    | C <sub>47</sub> H <sub>36</sub> N <sub>2</sub> O <sub>2</sub> S <sub>2</sub> |
| Formula weight                                       | 724.90                                                                       |
| Temperature/K                                        | 123(30)                                                                      |
| Crystal system                                       | monoclinic                                                                   |
| Space group                                          | <i>I2/a</i>                                                                  |
| <i>a</i> /Å                                          | 15.62220(10)                                                                 |
| <i>b</i> /Å                                          | 11.89850(10)                                                                 |
| <i>c</i> /Å                                          | 19.71010(10)                                                                 |
| $\alpha$ /°                                          | 90                                                                           |
| $\beta$ /°                                           | 105.1980(10)                                                                 |
| $\gamma$ /°                                          | 90                                                                           |
| Volume/Å <sup>3</sup>                                | 3535.59(4)                                                                   |
| <i>Z</i>                                             | 4                                                                            |
| $\rho_{\text{calc}}$ /cm <sup>3</sup>                | 1.362                                                                        |
| $\mu$ /mm <sup>-1</sup>                              | 1.713                                                                        |
| <i>F</i> (000)                                       | 1520.0                                                                       |
| Crystal size/mm <sup>3</sup>                         | 0.168 × 0.087 × 0.081                                                        |
| Radiation                                            | Cu <i>K</i> α ( $\lambda$ = 1.54184)                                         |
| 2 $\theta$ range for data collection/°               | 8.766 to 158.688                                                             |
| Index ranges                                         | -18 ≤ <i>h</i> ≤ 19, -15 ≤ <i>k</i> ≤ 15, -25 ≤ <i>l</i> ≤ 24                |
| Reflections collected                                | 43504                                                                        |
| Independent reflections                              | 3815 [ <i>R</i> <sub>int</sub> = 0.0344, <i>R</i> <sub>sigma</sub> = 0.0151] |
| Data/restraints/parameters                           | 3815/2/250                                                                   |
| Goodness-of-fit on <i>F</i> <sup>2</sup>             | 1.040                                                                        |
| Final <i>R</i> indexes [ <i>I</i> ≥ 2σ ( <i>I</i> )] | <i>R</i> <sub>1</sub> = 0.0386, <i>wR</i> <sub>2</sub> = 0.0956              |
| Final <i>R</i> indexes [all data]                    | <i>R</i> <sub>1</sub> = 0.0393, <i>wR</i> <sub>2</sub> = 0.0960              |
| Largest diff. peak/hole / e Å <sup>-3</sup>          | 0.55/-0.30                                                                   |

**Table S-13** Fractional Atomic Coordinates ( $\times 10^4$ ) and Equivalent Isotropic Displacement Parameters( $\text{\AA}^2 \times 10^3$ ).  $U_{\text{eq}}$  is defined as 1/3 of the trace of the orthogonalized  $U_{ij}$  tensor.

| Atom | <i>x</i>    | <i>y</i>     | <i>z</i>    | $U(\text{eq})$ |
|------|-------------|--------------|-------------|----------------|
| S1   | 5121.6 (2)  | 8381.1 (3)   | 3556.3 (2)  | 23.84 (11)     |
| N1   | 3021.1 (8)  | 1659.7 (9)   | 4714.3 (6)  | 16.6 (2)       |
| C1   | 5606.0 (9)  | 7277.7 (12)  | 3214.2 (7)  | 20.5 (3)       |
| C2   | 6234.7 (10) | 7379.2 (13)  | 2826.5 (8)  | 24.4 (3)       |
| C3   | 6561.5 (10) | 6411.9 (14)  | 2602.0 (8)  | 26.1 (3)       |
| C4   | 6278.5 (10) | 5357.0 (13)  | 2769.8 (8)  | 24.4 (3)       |
| C5   | 5661.9 (9)  | 5254.5 (12)  | 3155.2 (7)  | 21.5 (3)       |
| C6   | 5299.7 (9)  | 6224.3 (12)  | 3380.4 (7)  | 18.9 (3)       |
| C7   | 4658.4 (9)  | 6345.9 (12)  | 3792.4 (7)  | 18.6 (3)       |
| C8   | 4516.9 (10) | 7450.3 (12)  | 3913.0 (8)  | 21.5 (3)       |
| C9   | 4202.9 (9)  | 5420.8 (11)  | 4058.3 (7)  | 17.6 (3)       |
| C10  | 3970.0 (9)  | 4417.6 (12)  | 3685.1 (7)  | 19.0 (3)       |
| C11  | 3526.9 (9)  | 3565.5 (11)  | 3936.1 (7)  | 18.2 (3)       |
| C12  | 3295.9 (8)  | 3683.6 (11)  | 4569.9 (7)  | 15.7 (3)       |
| C13  | 3536.8 (9)  | 4679.7 (11)  | 4949.2 (7)  | 17.0 (3)       |
| C14  | 3984.6 (9)  | 5525.4 (11)  | 4699.1 (7)  | 17.9 (3)       |
| C15  | 2828.4 (9)  | 2769.3 (11)  | 4823.2 (7)  | 15.9 (3)       |
| C16  | 2500        | 1023.9 (16)  | 5000        | 16.8 (4)       |
| C17  | 2500        | -216.4 (15)  | 5000        | 15.3 (3)       |
| C18  | 2333.6 (8)  | -806.9 (11)  | 4356.4 (7)  | 16.0 (3)       |
| C19  | 2135.0 (9)  | -256.6 (12)  | 3686.1 (7)  | 20.4 (3)       |
| C20  | 1916.5 (10) | -863.1 (14)  | 3076.4 (8)  | 25.3 (3)       |
| C21  | 1880.7 (10) | -2054.9 (14) | 3085.5 (8)  | 25.9 (3)       |
| C22  | 2088.4 (10) | -2612.6 (12) | 3708.9 (8)  | 22.6 (3)       |
| C23  | 2316.6 (8)  | -2010.7 (11) | 4360.5 (7)  | 17.2 (3)       |
| C24  | 2500        | -2582.7 (16) | 5000        | 18.7 (4)       |
| O1   | 4495.2 (9)  | 606.4 (13)   | 4450.5 (9)  | 48.1 (4)       |
| C25  | 5064.2 (11) | 1276.0 (15)  | 4173.1 (11) | 35.7 (4)       |



**Table S-14** Selected Bond Distances (Å)

| Atom | Atom | Length/Å    | Atom | Atom             | Length/Å    |
|------|------|-------------|------|------------------|-------------|
| S1   | C1   | 1.7374 (15) | C11  | C12              | 1.3954 (19) |
| S1   | C8   | 1.7208 (14) | C12  | C13              | 1.3991 (19) |
| N1   | C15  | 1.3832 (17) | C12  | C15              | 1.4688 (17) |
| N1   | C16  | 1.3388 (16) | C13  | C14              | 1.3878 (18) |
| C1   | C2   | 1.399 (2)   | C15  | C15 <sup>1</sup> | 1.383 (3)   |
| C1   | C6   | 1.4105 (19) | C16  | C17              | 1.476 (3)   |
| C2   | C3   | 1.378 (2)   | C17  | C18 <sup>1</sup> | 1.4134 (16) |
| C3   | C4   | 1.399 (2)   | C17  | C18              | 1.4134 (16) |
| C4   | C5   | 1.380 (2)   | C18  | C19              | 1.4338 (19) |
| C5   | C6   | 1.407 (2)   | C18  | C23              | 1.4326 (18) |
| C6   | C7   | 1.4529 (19) | C19  | C20              | 1.366 (2)   |
| C7   | C8   | 1.364 (2)   | C20  | C21              | 1.419 (2)   |
| C7   | C9   | 1.4792 (18) | C21  | C22              | 1.359 (2)   |
| C9   | C10  | 1.3994 (19) | C22  | C23              | 1.4317 (19) |
| C9   | C14  | 1.3974 (19) | C23  | C24              | 1.3945 (16) |
| C10  | C11  | 1.3897 (19) | O1   | C25              | 1.407 (2)   |

<sup>1</sup>1/2-X,+Y,1-Z**Table S-15** Selected Bond Angles

| Atom | Atom | Atom | Angle/°     | Atom             | Atom | Atom             | Angle/°     |
|------|------|------|-------------|------------------|------|------------------|-------------|
| C8   | S1   | C1   | 90.79 (7)   | C13              | C12  | C15              | 122.27 (12) |
| C16  | N1   | C15  | 107.04 (12) | C14              | C13  | C12              | 120.96 (12) |
| C2   | C1   | S1   | 125.91 (11) | C13              | C14  | C9               | 121.44 (12) |
| C2   | C1   | C6   | 122.21 (14) | N1               | C15  | C12              | 120.43 (11) |
| C6   | C1   | S1   | 111.87 (11) | C15 <sup>1</sup> | C15  | N1               | 107.37 (7)  |
| C3   | C2   | C1   | 118.40 (14) | C15 <sup>1</sup> | C15  | C12              | 132.20 (7)  |
| C2   | C3   | C4   | 120.44 (14) | N1               | C16  | N1 <sup>1</sup>  | 111.19 (17) |
| C5   | C4   | C3   | 121.28 (15) | N1 <sup>1</sup>  | C16  | C17              | 124.41 (8)  |
| C4   | C5   | C6   | 119.84 (13) | N1               | C16  | C17              | 124.41 (8)  |
| C1   | C6   | C7   | 111.53 (13) | C18              | C17  | C16              | 119.81 (8)  |
| C5   | C6   | C1   | 117.81 (13) | C18 <sup>1</sup> | C17  | C16              | 119.81 (8)  |
| C5   | C6   | C7   | 130.63 (13) | C18              | C17  | C18 <sup>1</sup> | 120.38 (17) |
| C6   | C7   | C9   | 126.17 (12) | C17              | C18  | C19              | 122.99 (13) |
| C8   | C7   | C6   | 111.13 (12) | C17              | C18  | C23              | 119.42 (12) |
| C8   | C7   | C9   | 122.70 (13) | C23              | C18  | C19              | 117.52 (12) |
| C7   | C8   | S1   | 114.68 (11) | C20              | C19  | C18              | 120.87 (13) |

| Atom | Atom | Atom | Angle/°     | Atom             | Atom | Atom | Angle/°     |
|------|------|------|-------------|------------------|------|------|-------------|
| C10  | C9   | C7   | 122.10 (12) | C19              | C20  | C21  | 121.21 (14) |
| C14  | C9   | C7   | 120.53 (12) | C22              | C21  | C20  | 119.90 (14) |
| C14  | C9   | C10  | 117.37 (12) | C21              | C22  | C23  | 120.74 (14) |
| C11  | C10  | C9   | 121.35 (12) | C22              | C23  | C18  | 119.72 (13) |
| C10  | C11  | C12  | 121.00 (12) | C24              | C23  | C18  | 119.56 (13) |
| C11  | C12  | C13  | 117.86 (12) | C24              | C23  | C22  | 120.70 (13) |
| C11  | C12  | C15  | 119.87 (12) | C23 <sup>1</sup> | C24  | C23  | 121.58 (18) |

<sup>1</sup>/2-X,+Y,1-Z

**Table S-16** Selected Torsion Angles

| A               | B   | C   | D                | Angle/°      | A                | B   | C   | D                | Angle/°      |
|-----------------|-----|-----|------------------|--------------|------------------|-----|-----|------------------|--------------|
| S1              | C1  | C2  | C3               | 179.09 (12)  | C10              | C11 | C12 | C13              | -1.0 (2)     |
| S1              | C1  | C6  | C5               | -177.89 (11) | C10              | C11 | C12 | C15              | -179.94 (12) |
| S1              | C1  | C6  | C7               | 0.13 (15)    | C11              | C12 | C13 | C14              | 0.52 (19)    |
| N1              | C16 | C17 | C18 <sup>1</sup> | 122.87 (8)   | C11              | C12 | C15 | N1               | 35.97 (19)   |
| N1 <sup>1</sup> | C16 | C17 | C18 <sup>1</sup> | -57.13 (8)   | C11              | C12 | C15 | C15 <sup>1</sup> | -143.54 (19) |
| N1              | C16 | C17 | C18              | -57.13 (8)   | C12              | C13 | C14 | C9               | 0.7 (2)      |
| N1 <sup>1</sup> | C16 | C17 | C18              | 122.87 (8)   | C13              | C12 | C15 | N1               | -142.96 (13) |
| C1              | S1  | C8  | C7               | 0.19 (12)    | C13              | C12 | C15 | C15 <sup>1</sup> | 37.5 (3)     |
| C1              | C2  | C3  | C4               | -1.0 (2)     | C14              | C9  | C10 | C11              | 1.0 (2)      |
| C1              | C6  | C7  | C8               | 0.01 (17)    | C15              | N1  | C16 | N1 <sup>1</sup>  | 0.20 (7)     |
| C1              | C6  | C7  | C9               | -179.93 (13) | C15              | N1  | C16 | C17              | -179.80 (7)  |
| C2              | C1  | C6  | C5               | 1.3 (2)      | C15              | C12 | C13 | C14              | 179.47 (12)  |
| C2              | C1  | C6  | C7               | 179.36 (13)  | C16              | N1  | C15 | C12              | 179.86 (10)  |
| C2              | C3  | C4  | C5               | 0.7 (2)      | C16              | N1  | C15 | C15 <sup>1</sup> | -0.51 (17)   |
| C3              | C4  | C5  | C6               | 0.7 (2)      | C16              | C17 | C18 | C19              | -1.89 (14)   |
| C4              | C5  | C6  | C1               | -1.6 (2)     | C16              | C17 | C18 | C23              | -178.70 (8)  |
| C4              | C5  | C6  | C7               | -179.20 (14) | C17              | C18 | C19 | C20              | -175.28 (12) |
| C5              | C6  | C7  | C8               | 177.70 (14)  | C17              | C18 | C23 | C22              | 175.71 (10)  |
| C5              | C6  | C7  | C9               | -2.2 (2)     | C17              | C18 | C23 | C24              | -2.62 (16)   |
| C6              | C1  | C2  | C3               | 0.0 (2)      | C18 <sup>1</sup> | C17 | C18 | C19              | 178.11 (14)  |
| C6              | C7  | C8  | S1               | -0.15 (16)   | C18 <sup>1</sup> | C17 | C18 | C23              | 1.30 (8)     |
| C6              | C7  | C9  | C10              | -33.5 (2)    | C18              | C19 | C20 | C21              | -0.1 (2)     |
| C6              | C7  | C9  | C14              | 146.79 (14)  | C18              | C23 | C24 | C23 <sup>1</sup> | 1.31 (8)     |
| C7              | C9  | C10 | C11              | -178.74 (13) | C19              | C18 | C23 | C22              | -1.27 (18)   |
| C7              | C9  | C14 | C13              | 178.30 (12)  | C19              | C18 | C23 | C24              | -179.60 (10) |
| C8              | S1  | C1  | C2               | -179.37 (14) | C19              | C20 | C21 | C22              | -1.7 (2)     |
| C8              | S1  | C1  | C6               | -0.18 (11)   | C20              | C21 | C22 | C23              | 2.0 (2)      |

| A   | B   | C   | D   | Angle/°     | A   | B   | C   | D                | Angle/°      |
|-----|-----|-----|-----|-------------|-----|-----|-----|------------------|--------------|
| C8  | C7  | C9  | C10 | 146.56 (14) | C21 | C22 | C23 | C18              | -0.5 (2)     |
| C8  | C7  | C9  | C14 | -33.1 (2)   | C21 | C22 | C23 | C24              | 177.79 (12)  |
| C9  | C7  | C8  | S1  | 179.79 (10) | C22 | C23 | C24 | C23 <sup>1</sup> | -177.00 (14) |
| C9  | C10 | C11 | C12 | 0.2 (2)     | C23 | C18 | C19 | C20              | 1.6 (2)      |
| C10 | C9  | C14 | C13 | -1.4 (2)    |     |     |     |                  |              |

<sup>1</sup>1/2-X,+Y,1-Z

**Table S-17** Hydrogen Bonds

| D  | H   | A               | d(D-H)/Å   | d(H-A)/Å | d(D-A)/Å    | D-H-A/° |
|----|-----|-----------------|------------|----------|-------------|---------|
| N1 | H1  | O1              | 0.77 (4)   | 2.04 (4) | 2.7879 (18) | 165 (3) |
| O1 | H1A | O1 <sup>1</sup> | 0.84       | 2.17     | 2.733 (3)   | 124.3   |
| O1 | H1B | N1              | 0.838 (19) | 1.96 (2) | 2.7879 (18) | 172 (5) |

<sup>1</sup>1-X,-Y,1-Z

## 6.4 Crystallographic Data and Detailed Refinements for **6**

**Table S-18** Crystal data and structure refinement

|                                       |                                                                |
|---------------------------------------|----------------------------------------------------------------|
| Identification code                   | AM-BAM                                                         |
| Empirical formula                     | C <sub>30</sub> H <sub>20</sub> Br <sub>2</sub> N <sub>2</sub> |
| Formula weight                        | 568.30                                                         |
| Temperature/K                         | 293(2)                                                         |
| Crystal system                        | orthorhombic                                                   |
| Space group                           | <i>Pna</i> 2 <sub>1</sub>                                      |
| <i>a</i> /Å                           | 15.5732(3)                                                     |
| <i>b</i> /Å                           | 11.1891(3)                                                     |
| <i>c</i> /Å                           | 28.3670(6)                                                     |
| $\alpha$ /°                           | 90                                                             |
| $\beta$ /°                            | 90                                                             |
| $\gamma$ /°                           | 90                                                             |
| Volume/Å <sup>3</sup>                 | 4942.95(19)                                                    |
| <i>Z</i>                              | 8                                                              |
| $\rho_{\text{calc}}$ /cm <sup>3</sup> | 1.527                                                          |
| $\mu$ /mm <sup>-1</sup>               | 4.314                                                          |
| <i>F</i> (000)                        | 2272.0                                                         |

|                                             |                                                                 |
|---------------------------------------------|-----------------------------------------------------------------|
| Crystal size/mm <sup>3</sup>                | 0.183 × 0.122 × 0.047                                           |
| Radiation                                   | Cu K $\alpha$ ( $\lambda$ = 1.54184)                            |
| 2 $\theta$ range for data collection/°      | 6.232 to 159.148                                                |
| Index ranges                                | -19 ≤ $h$ ≤ 14, -14 ≤ $k$ ≤ 14, -36 ≤ $l$ ≤ 36                  |
| Reflections collected                       | 57548                                                           |
| Independent reflections                     | 10338 [ $R_{\text{int}}$ = 0.0328, $R_{\text{sigma}}$ = 0.0202] |
| Data/restraints/parameters                  | 10338/1/616                                                     |
| Goodness-of-fit on $F^2$                    | 1.093                                                           |
| Final $R$ indexes [ $I \geq 2\sigma(I)$ ]   | $R_1$ = 0.0471, $wR_2$ = 0.1290                                 |
| Final $R$ indexes [all data]                | $R_1$ = 0.0548, $wR_2$ = 0.1448                                 |
| Largest diff. peak/hole / e Å <sup>-3</sup> | 0.95/-0.54                                                      |
| Flack parameter                             | 0.37(3)                                                         |

**Table S-19** Fractional Atomic Coordinates ( $\times 10^4$ ) and Equivalent Isotropic Displacement Parameters ( $\text{\AA}^2 \times 10^3$ ).  $U_{\text{eq}}$  is defined as 1/3 of the trace of the orthogonalised  $U_{\text{ij}}$  tensor.

| Atom | $x$        | $y$          | $z$         | $U(\text{eq})$ |
|------|------------|--------------|-------------|----------------|
| Br1  | 4434.6 (8) | -2874.4 (12) | 7453.2 (4)  | 95.1 (4)       |
| Br2  | 9168.0 (7) | 2514.0 (10)  | 7261.9 (4)  | 81.0 (4)       |
| N1   | 5563 (3)   | -97 (4)      | 5368.3 (17) | 46.9 (10)      |
| N2   | 6603 (3)   | 1244 (4)     | 5299.1 (18) | 48.1 (11)      |
| C1   | 5974 (4)   | -52 (6)      | 5802 (2)    | 46.7 (13)      |
| C2   | 6623 (4)   | 768 (6)      | 5748 (2)    | 46.8 (13)      |
| C3   | 5964 (4)   | 713 (5)      | 5083.4 (19) | 44.4 (12)      |
| C4   | 5644 (4)   | -746 (6)     | 6204 (2)    | 46.8 (12)      |
| C5   | 5642 (4)   | -1977 (6)    | 6205 (2)    | 49.9 (13)      |
| C6   | 5308 (5)   | -2615 (6)    | 6573 (3)    | 54 (2)         |
| C7   | 4947 (5)   | -2000 (8)    | 6949 (2)    | 60.1 (16)      |
| C8   | 4939 (6)   | -776 (8)     | 6962 (3)    | 76 (2)         |
| C9   | 5291 (6)   | -151 (7)     | 6592 (2)    | 67.5 (19)      |
| C10  | 7261 (4)   | 1167 (5)     | 6098 (2)    | 47.3 (13)      |
| C11  | 7473 (5)   | 456 (7)      | 6484 (3)    | 58.8 (16)      |
| C12  | 8044 (5)   | 857 (8)      | 6821 (3)    | 65.6 (18)      |
| C13  | 8410 (4)   | 1954 (7)     | 6772 (3)    | 57.8 (16)      |
| C14  | 8240 (6)   | 2666 (8)     | 6392 (5)    | 66 (2)         |
| C15  | 7668 (6)   | 2263 (7)     | 6054 (4)    | 62 (2)         |
| C16  | 4848 (5)   | -858 (7)     | 5241 (2)    | 62.7 (18)      |
| C17  | 5633 (4)   | 958 (6)      | 4605 (2)    | 47.3 (13)      |
| C18  | 4990 (4)   | 1830 (6)     | 4551 (2)    | 52.4 (14)      |
| C19  | 4654 (7)   | 2484 (6)     | 4945 (4)    | 60 (2)         |

| <b>Atom</b> | <b>x</b>    | <b>y</b>    | <b>z</b>    | <b>U(eq)</b> |
|-------------|-------------|-------------|-------------|--------------|
| C20         | 4021 (6)    | 3326 (7)    | 4874 (4)    | 80 (2)       |
| C21         | 3725 (6)    | 3582 (8)    | 4415 (4)    | 89 (3)       |
| C22         | 4014 (6)    | 2989 (8)    | 4043 (4)    | 78 (3)       |
| C23         | 4648 (5)    | 2078 (7)    | 4092 (3)    | 59.7 (18)    |
| C24         | 4941 (5)    | 1393 (8)    | 3712 (3)    | 69 (2)       |
| C25         | 5567 (5)    | 516 (6)     | 3760 (2)    | 58.8 (16)    |
| C26         | 5879 (7)    | -174 (9)    | 3371 (3)    | 85 (3)       |
| C27         | 6505 (8)    | -980 (10)   | 3422 (4)    | 97 (3)       |
| C28         | 6881 (7)    | -1177 (8)   | 3871 (3)    | 85 (2)       |
| C29         | 6582 (5)    | -544 (7)    | 4253 (3)    | 63.7 (18)    |
| C30         | 5936 (4)    | 302 (6)     | 4215 (2)    | 51.1 (13)    |
| Br3         | 8063.6 (10) | 2297.6 (14) | 2541.9 (4)  | 118.4 (5)    |
| Br4         | 3338.7 (8)  | 7584.9 (10) | 2738.4 (4)  | 84.3 (4)     |
| N3          | 6880 (3)    | 4916 (4)    | 4637.4 (16) | 46.2 (10)    |
| N4          | 5836 (3)    | 6261 (5)    | 4709.3 (18) | 48.7 (11)    |
| C31         | 6468 (4)    | 4970 (6)    | 4207 (2)    | 44.9 (12)    |
| C32         | 5826 (4)    | 5792 (5)    | 4257 (2)    | 44.2 (12)    |
| C33         | 6475 (4)    | 5715 (5)    | 4922.9 (19) | 44.9 (12)    |
| C34         | 6813 (4)    | 4316 (5)    | 3797.1 (19) | 44.6 (12)    |
| C35         | 6819 (4)    | 3082 (6)    | 3782 (2)    | 53.4 (14)    |
| C36         | 7190 (7)    | 2478 (6)    | 3398 (4)    | 61 (3)       |
| C37         | 7530 (5)    | 3111 (9)    | 3050 (3)    | 68.1 (19)    |
| C38         | 7540 (6)    | 4317 (9)    | 3044 (3)    | 75 (2)       |
| C39         | 7170 (5)    | 4925 (7)    | 3421 (2)    | 64.3 (18)    |
| C40         | 5192 (4)    | 6186 (5)    | 3906 (2)    | 46.3 (12)    |
| C41         | 4995 (4)    | 5505 (6)    | 3513 (2)    | 58.2 (16)    |
| C42         | 4428 (4)    | 5897 (7)    | 3169 (2)    | 59.3 (16)    |
| C43         | 4067 (4)    | 7020 (7)    | 3219 (2)    | 57.4 (16)    |
| C44         | 4227 (6)    | 7701 (8)    | 3614 (4)    | 64 (2)       |
| C45         | 4797 (5)    | 7296 (7)    | 3953 (3)    | 58.1 (19)    |
| C46         | 7597 (5)    | 4152 (7)    | 4765 (3)    | 65.0 (19)    |
| C47         | 6815 (4)    | 5960 (5)    | 5403 (2)    | 44.8 (12)    |
| C48         | 7467 (4)    | 6828 (6)    | 5455 (2)    | 48.8 (13)    |
| C49         | 7802 (6)    | 7489 (6)    | 5069 (4)    | 58 (2)       |
| C50         | 8409 (5)    | 8323 (7)    | 5126 (4)    | 77 (2)       |
| C51         | 8734 (5)    | 8566 (7)    | 5585 (4)    | 79 (2)       |
| C52         | 8442 (5)    | 7952 (8)    | 5961 (3)    | 69 (2)       |
| C53         | 7818 (4)    | 7042 (7)    | 5910 (3)    | 55.1 (15)    |
| C54         | 7551 (4)    | 6346 (7)    | 6289 (2)    | 57.5 (16)    |
| C55         | 6932 (4)    | 5488 (6)    | 6247 (2)    | 55.9 (15)    |
| C56         | 6637 (6)    | 4767 (8)    | 6633 (3)    | 73 (2)       |

| <b>Atom</b> | <b>x</b> | <b>y</b> | <b>z</b> | <b>U(eq)</b> |
|-------------|----------|----------|----------|--------------|
| C57         | 5990 (7) | 3969 (9) | 6579 (3) | 81 (2)       |
| C58         | 5602 (6) | 3811 (8) | 6140 (3) | 78 (2)       |
| C59         | 5868 (5) | 4423 (7) | 5755 (3) | 62.4 (17)    |
| C60         | 6534 (4) | 5287 (6) | 5793 (2) | 49.4 (13)    |

**Table S-20** Selected Bond Distances (Å)

| <b>Atom</b> | <b>Atom</b> | <b>Length/Å</b> | <b>Atom</b> | <b>Atom</b> | <b>Length/Å</b> |
|-------------|-------------|-----------------|-------------|-------------|-----------------|
| Br1         | C7          | 1.907 (7)       | Br3         | C37         | 1.896 (8)       |
| Br2         | C13         | 1.928 (6)       | Br4         | C43         | 1.883 (7)       |
| N1          | C1          | 1.388 (8)       | N3          | C31         | 1.379 (8)       |
| N1          | C3          | 1.366 (7)       | N3          | C33         | 1.361 (7)       |
| N1          | C16         | 1.448 (8)       | N3          | C46         | 1.452 (8)       |
| N2          | C2          | 1.381 (8)       | N4          | C32         | 1.388 (7)       |
| N2          | C3          | 1.310 (7)       | N4          | C33         | 1.315 (7)       |
| C1          | C2          | 1.374 (9)       | C31         | C32         | 1.366 (8)       |
| C1          | C4          | 1.472 (8)       | C31         | C34         | 1.476 (8)       |
| C2          | C10         | 1.473 (8)       | C32         | C40         | 1.469 (8)       |
| C3          | C17         | 1.477 (8)       | C33         | C47         | 1.487 (8)       |
| C4          | C5          | 1.378 (9)       | C34         | C35         | 1.382 (9)       |
| C4          | C9          | 1.398 (9)       | C34         | C39         | 1.382 (9)       |
| C5          | C6          | 1.366 (10)      | C35         | C36         | 1.406 (12)      |
| C6          | C7          | 1.389 (11)      | C36         | C37         | 1.327 (14)      |
| C7          | C8          | 1.370 (12)      | C37         | C38         | 1.349 (13)      |
| C8          | C9          | 1.376 (10)      | C38         | C39         | 1.393 (10)      |
| C10         | C11         | 1.394 (9)       | C40         | C41         | 1.384 (9)       |
| C10         | C15         | 1.386 (9)       | C40         | C45         | 1.393 (9)       |
| C11         | C12         | 1.381 (10)      | C41         | C42         | 1.386 (9)       |
| C12         | C13         | 1.361 (11)      | C42         | C43         | 1.384 (11)      |
| C13         | C14         | 1.366 (14)      | C43         | C44         | 1.377 (13)      |
| C14         | C15         | 1.383 (14)      | C44         | C45         | 1.384 (12)      |
| C17         | C18         | 1.406 (9)       | C47         | C48         | 1.412 (9)       |
| C17         | C30         | 1.411 (9)       | C47         | C60         | 1.408 (9)       |
| C18         | C19         | 1.433 (13)      | C48         | C49         | 1.419 (13)      |
| C18         | C23         | 1.436 (9)       | C48         | C53         | 1.424 (9)       |
| C19         | C20         | 1.378 (13)      | C49         | C50         | 1.338 (12)      |
| C20         | C21         | 1.412 (15)      | C50         | C51         | 1.423 (14)      |
| C21         | C22         | 1.326 (15)      | C51         | C52         | 1.347 (14)      |
| C22         | C23         | 1.427 (12)      | C52         | C53         | 1.415 (11)      |

| Atom | Atom | Length/Å   | Atom | Atom | Length/Å   |
|------|------|------------|------|------|------------|
| C23  | C24  | 1.398 (12) | C53  | C54  | 1.391 (11) |
| C24  | C25  | 1.390 (11) | C54  | C55  | 1.366 (10) |
| C25  | C26  | 1.433 (12) | C55  | C56  | 1.437 (10) |
| C25  | C30  | 1.433 (9)  | C55  | C60  | 1.445 (8)  |
| C26  | C27  | 1.336 (15) | C56  | C57  | 1.355 (13) |
| C27  | C28  | 1.419 (14) | C57  | C58  | 1.393 (13) |
| C28  | C29  | 1.374 (11) | C58  | C59  | 1.354 (11) |
| C29  | C30  | 1.386 (11) | C59  | C60  | 1.422 (10) |

**Table S-21** Selected Bond Angles

| Atom | Atom | Atom | Angle/°   | Atom | Atom | Atom | Angle/°   |
|------|------|------|-----------|------|------|------|-----------|
| C1   | N1   | C16  | 126.7 (5) | C31  | N3   | C46  | 127.1 (5) |
| C3   | N1   | C1   | 106.8 (5) | C33  | N3   | C31  | 106.4 (5) |
| C3   | N1   | C16  | 126.5 (5) | C33  | N3   | C46  | 126.5 (5) |
| C3   | N2   | C2   | 105.8 (5) | C33  | N4   | C32  | 105.1 (5) |
| N1   | C1   | C4   | 120.5 (5) | N3   | C31  | C34  | 120.4 (5) |
| C2   | C1   | N1   | 105.4 (5) | C32  | C31  | N3   | 106.3 (5) |
| C2   | C1   | C4   | 134.0 (6) | C32  | C31  | C34  | 132.9 (6) |
| N2   | C2   | C10  | 121.3 (6) | N4   | C32  | C40  | 121.5 (5) |
| C1   | C2   | N2   | 110.1 (5) | C31  | C32  | N4   | 109.9 (5) |
| C1   | C2   | C10  | 128.6 (6) | C31  | C32  | C40  | 128.7 (5) |
| N1   | C3   | C17  | 120.4 (5) | N3   | C33  | C47  | 120.1 (5) |
| N2   | C3   | N1   | 111.9 (5) | N4   | C33  | N3   | 112.4 (5) |
| N2   | C3   | C17  | 127.6 (5) | N4   | C33  | C47  | 127.3 (5) |
| C5   | C4   | C1   | 122.0 (6) | C35  | C34  | C31  | 121.5 (6) |
| C5   | C4   | C9   | 118.2 (6) | C35  | C34  | C39  | 117.8 (6) |
| C9   | C4   | C1   | 119.7 (6) | C39  | C34  | C31  | 120.7 (6) |
| C6   | C5   | C4   | 121.7 (6) | C34  | C35  | C36  | 120.5 (7) |
| C5   | C6   | C7   | 118.8 (7) | C37  | C36  | C35  | 119.0 (7) |
| C6   | C7   | Br1  | 119.4 (6) | C36  | C37  | Br3  | 119.0 (7) |
| C8   | C7   | Br1  | 119.3 (6) | C36  | C37  | C38  | 123.2 (7) |
| C8   | C7   | C6   | 121.3 (7) | C38  | C37  | Br3  | 117.8 (7) |
| C7   | C8   | C9   | 118.9 (7) | C37  | C38  | C39  | 118.3 (7) |
| C8   | C9   | C4   | 121.0 (7) | C34  | C39  | C38  | 121.2 (7) |
| C11  | C10  | C2   | 121.1 (6) | C41  | C40  | C32  | 121.9 (5) |
| C15  | C10  | C2   | 121.1 (6) | C41  | C40  | C45  | 118.0 (6) |
| C15  | C10  | C11  | 117.8 (6) | C45  | C40  | C32  | 120.0 (6) |

| Atom | Atom | Atom | Angle/°    | Atom | Atom | Atom | Angle/°    |
|------|------|------|------------|------|------|------|------------|
| C12  | C11  | C10  | 120.7 (7)  | C40  | C41  | C42  | 122.2 (6)  |
| C13  | C12  | C11  | 119.5 (7)  | C43  | C42  | C41  | 118.3 (6)  |
| C12  | C13  | Br2  | 118.3 (6)  | C42  | C43  | Br4  | 118.4 (5)  |
| C12  | C13  | C14  | 121.7 (7)  | C44  | C43  | Br4  | 120.8 (6)  |
| C14  | C13  | Br2  | 119.9 (6)  | C44  | C43  | C42  | 120.8 (7)  |
| C13  | C14  | C15  | 118.7 (7)  | C43  | C44  | C45  | 120.0 (7)  |
| C14  | C15  | C10  | 121.4 (8)  | C44  | C45  | C40  | 120.5 (8)  |
| C18  | C17  | C3   | 118.6 (6)  | C48  | C47  | C33  | 118.5 (5)  |
| C18  | C17  | C30  | 120.9 (6)  | C60  | C47  | C33  | 120.7 (5)  |
| C30  | C17  | C3   | 120.4 (6)  | C60  | C47  | C48  | 120.7 (5)  |
| C17  | C18  | C19  | 121.9 (7)  | C47  | C48  | C49  | 122.9 (6)  |
| C17  | C18  | C23  | 119.8 (7)  | C47  | C48  | C53  | 119.0 (6)  |
| C19  | C18  | C23  | 118.2 (7)  | C49  | C48  | C53  | 118.1 (7)  |
| C20  | C19  | C18  | 119.8 (10) | C50  | C49  | C48  | 122.0 (10) |
| C19  | C20  | C21  | 120.4 (10) | C49  | C50  | C51  | 119.7 (9)  |
| C22  | C21  | C20  | 121.5 (8)  | C52  | C51  | C50  | 120.4 (7)  |
| C21  | C22  | C23  | 121.0 (9)  | C51  | C52  | C53  | 121.3 (8)  |
| C22  | C23  | C18  | 118.9 (8)  | C52  | C53  | C48  | 118.5 (8)  |
| C24  | C23  | C18  | 118.2 (7)  | C54  | C53  | C48  | 119.5 (6)  |
| C24  | C23  | C22  | 122.9 (8)  | C54  | C53  | C52  | 122.0 (7)  |
| C25  | C24  | C23  | 122.7 (6)  | C55  | C54  | C53  | 122.4 (6)  |
| C24  | C25  | C26  | 122.9 (7)  | C54  | C55  | C56  | 123.5 (6)  |
| C24  | C25  | C30  | 119.2 (7)  | C54  | C55  | C60  | 119.4 (6)  |
| C30  | C25  | C26  | 117.9 (7)  | C56  | C55  | C60  | 117.1 (7)  |
| C27  | C26  | C25  | 121.8 (8)  | C57  | C56  | C55  | 121.3 (7)  |
| C26  | C27  | C28  | 120.3 (9)  | C56  | C57  | C58  | 120.6 (8)  |
| C29  | C28  | C27  | 119.2 (9)  | C59  | C58  | C57  | 121.5 (8)  |
| C28  | C29  | C30  | 122.4 (8)  | C58  | C59  | C60  | 120.4 (8)  |
| C17  | C30  | C25  | 119.0 (6)  | C47  | C60  | C55  | 118.9 (6)  |
| C29  | C30  | C17  | 122.6 (6)  | C47  | C60  | C59  | 122.1 (6)  |
| C29  | C30  | C25  | 118.4 (6)  | C59  | C60  | C55  | 119.0 (6)  |

**Table S-22** Selected Torsion Angles

| A   | B   | C   | D   | Angle/°    | A   | B   | C   | D   | Angle/°    |
|-----|-----|-----|-----|------------|-----|-----|-----|-----|------------|
| Br1 | C7  | C8  | C9  | -178.4 (7) | Br3 | C37 | C38 | C39 | -178.3 (6) |
| Br2 | C13 | C14 | C15 | -177.4 (7) | Br4 | C43 | C44 | C45 | -176.8 (7) |
| N1  | C1  | C2  | N2  | 1.6 (7)    | N3  | C31 | C32 | N4  | 0.6 (7)    |
| N1  | C1  | C2  | C10 | 179.9 (6)  | N3  | C31 | C32 | C40 | -179.8 (6) |



| <b>A</b> | <b>B</b> | <b>C</b> | <b>D</b> | <b>Angle/°</b> | <b>A</b> | <b>B</b> | <b>C</b> | <b>D</b> | <b>Angle/°</b> |
|----------|----------|----------|----------|----------------|----------|----------|----------|----------|----------------|
| N1       | C1       | C4       | C5       | 65.5 (9)       | N3       | C31      | C34      | C35      | 67.2 (9)       |
| N1       | C1       | C4       | C9       | -112.1 (8)     | N3       | C31      | C34      | C39      | -110.3 (7)     |
| N1       | C3       | C17      | C18      | 86.7 (7)       | N3       | C33      | C47      | C48      | 85.6 (7)       |
| N1       | C3       | C17      | C30      | -91.3 (7)      | N3       | C33      | C47      | C60      | -90.4 (7)      |
| N2       | C2       | C10      | C11      | -158.9 (6)     | N4       | C32      | C40      | C41      | -159.8 (6)     |
| N2       | C2       | C10      | C15      | 21.4 (10)      | N4       | C32      | C40      | C45      | 22.8 (9)       |
| N2       | C3       | C17      | C18      | -88.7 (8)      | N4       | C33      | C47      | C48      | -88.6 (8)      |
| N2       | C3       | C17      | C30      | 93.3 (8)       | N4       | C33      | C47      | C60      | 95.4 (8)       |
| C1       | N1       | C3       | N2       | 1.2 (7)        | C31      | N3       | C33      | N4       | 0.6 (7)        |
| C1       | N1       | C3       | C17      | -174.9 (6)     | C31      | N3       | C33      | C47      | -174.4 (6)     |
| C1       | C2       | C10      | C11      | 22.9 (10)      | C31      | C32      | C40      | C41      | 20.6 (10)      |
| C1       | C2       | C10      | C15      | -156.8 (8)     | C31      | C32      | C40      | C45      | -156.8 (7)     |
| C1       | C4       | C5       | C6       | -177.7 (7)     | C31      | C34      | C35      | C36      | -176.8 (7)     |
| C1       | C4       | C9       | C8       | 176.8 (7)      | C31      | C34      | C39      | C38      | 176.4 (7)      |
| C2       | N2       | C3       | N1       | -0.2 (7)       | C32      | N4       | C33      | N3       | -0.2 (7)       |
| C2       | N2       | C3       | C17      | 175.5 (6)      | C32      | N4       | C33      | C47      | 174.4 (6)      |
| C2       | C1       | C4       | C5       | -119.6 (9)     | C32      | C31      | C34      | C35      | -121.4 (8)     |
| C2       | C1       | C4       | C9       | 62.8 (11)      | C32      | C31      | C34      | C39      | 61.0 (11)      |
| C2       | C10      | C11      | C12      | -177.3 (7)     | C32      | C40      | C41      | C42      | -176.9 (7)     |
| C2       | C10      | C15      | C14      | 177.2 (8)      | C32      | C40      | C45      | C44      | 177.2 (8)      |
| C3       | N1       | C1       | C2       | -1.7 (7)       | C33      | N3       | C31      | C32      | -0.7 (7)       |
| C3       | N1       | C1       | C4       | 174.5 (6)      | C33      | N3       | C31      | C34      | 172.7 (6)      |
| C3       | N2       | C2       | C1       | -0.9 (7)       | C33      | N4       | C32      | C31      | -0.3 (7)       |
| C3       | N2       | C2       | C10      | -179.4 (6)     | C33      | N4       | C32      | C40      | -179.9 (5)     |
| C3       | C17      | C18      | C19      | 0.2 (9)        | C33      | C47      | C48      | C49      | 0.9 (9)        |
| C3       | C17      | C18      | C23      | -179.3 (6)     | C33      | C47      | C48      | C53      | -177.9 (5)     |
| C3       | C17      | C30      | C25      | 176.5 (6)      | C33      | C47      | C60      | C55      | 175.0 (5)      |
| C3       | C17      | C30      | C29      | -3.6 (10)      | C33      | C47      | C60      | C59      | -5.3 (9)       |
| C4       | C1       | C2       | N2       | -173.8 (7)     | C34      | C31      | C32      | N4       | -171.6 (7)     |
| C4       | C1       | C2       | C10      | 4.5 (12)       | C34      | C31      | C32      | C40      | 8.0 (12)       |
| C4       | C5       | C6       | C7       | 1.2 (12)       | C34      | C35      | C36      | C37      | -0.3 (12)      |
| C5       | C4       | C9       | C8       | -0.9 (12)      | C35      | C34      | C39      | C38      | -1.2 (11)      |
| C5       | C6       | C7       | Br1      | 177.4 (6)      | C35      | C36      | C37      | Br3      | 177.9 (6)      |
| C5       | C6       | C7       | C8       | -1.5 (13)      | C35      | C36      | C37      | C38      | 0.1 (14)       |
| C6       | C7       | C8       | C9       | 0.5 (13)       | C36      | C37      | C38      | C39      | -0.5 (13)      |
| C7       | C8       | C9       | C4       | 0.7 (13)       | C37      | C38      | C39      | C34      | 1.1 (12)       |
| C9       | C4       | C5       | C6       | -0.1 (11)      | C39      | C34      | C35      | C36      | 0.8 (10)       |
| C10      | C11      | C12      | C13      | -0.7 (12)      | C40      | C41      | C42      | C43      | 1.5 (12)       |
| C11      | C10      | C15      | C14      | -2.5 (13)      | C41      | C40      | C45      | C44      | -0.3 (12)      |
| C11      | C12      | C13      | Br2      | 177.4 (6)      | C41      | C42      | C43      | Br4      | 177.1 (6)      |
| C11      | C12      | C13      | C14      | -1.2 (12)      | C41      | C42      | C43      | C44      | -3.7 (12)      |

| <b>A</b> | <b>B</b> | <b>C</b> | <b>D</b> | <b>Angle/°</b> | <b>A</b> | <b>B</b> | <b>C</b> | <b>D</b> | <b>Angle/°</b> |
|----------|----------|----------|----------|----------------|----------|----------|----------|----------|----------------|
| C12      | C13      | C14      | C15      | 1.2 (14)       | C42      | C43      | C44      | C45      | 4.0 (14)       |
| C13      | C14      | C15      | C10      | 0.7 (15)       | C43      | C44      | C45      | C40      | -1.9 (14)      |
| C15      | C10      | C11      | C12      | 2.5 (11)       | C45      | C40      | C41      | C42      | 0.5 (11)       |
| C16      | N1       | C1       | C2       | 178.0 (6)      | C46      | N3       | C31      | C32      | 178.6 (6)      |
| C16      | N1       | C1       | C4       | -5.8 (10)      | C46      | N3       | C31      | C34      | -8.0 (10)      |
| C16      | N1       | C3       | N2       | -178.5 (6)     | C46      | N3       | C33      | N4       | -178.7 (6)     |
| C16      | N1       | C3       | C17      | 5.4 (10)       | C46      | N3       | C33      | C47      | 6.2 (10)       |
| C17      | C18      | C19      | C20      | -179.6 (7)     | C47      | C48      | C49      | C50      | 178.8 (7)      |
| C17      | C18      | C23      | C22      | -178.3 (6)     | C47      | C48      | C53      | C52      | -177.2 (6)     |
| C17      | C18      | C23      | C24      | 3.1 (9)        | C47      | C48      | C53      | C54      | 3.8 (9)        |
| C18      | C17      | C30      | C25      | -1.4 (9)       | C48      | C47      | C60      | C55      | -0.9 (8)       |
| C18      | C17      | C30      | C29      | 178.5 (6)      | C48      | C47      | C60      | C59      | 178.7 (6)      |
| C18      | C19      | C20      | C21      | -2.5 (13)      | C48      | C49      | C50      | C51      | -0.1 (13)      |
| C18      | C23      | C24      | C25      | -2.3 (10)      | C48      | C53      | C54      | C55      | -2.9 (10)      |
| C19      | C18      | C23      | C22      | 2.2 (10)       | C49      | C48      | C53      | C52      | 3.9 (9)        |
| C19      | C18      | C23      | C24      | -176.4 (7)     | C49      | C48      | C53      | C54      | -175.1 (6)     |
| C19      | C20      | C21      | C22      | 3.1 (14)       | C49      | C50      | C51      | C52      | 0.8 (13)       |
| C20      | C21      | C22      | C23      | -0.9 (14)      | C50      | C51      | C52      | C53      | 0.9 (13)       |
| C21      | C22      | C23      | C18      | -1.7 (12)      | C51      | C52      | C53      | C48      | -3.3 (11)      |
| C21      | C22      | C23      | C24      | 176.8 (8)      | C51      | C52      | C53      | C54      | 175.7 (7)      |
| C22      | C23      | C24      | C25      | 179.2 (7)      | C52      | C53      | C54      | C55      | 178.2 (7)      |
| C23      | C18      | C19      | C20      | -0.1 (11)      | C53      | C48      | C49      | C50      | -2.3 (11)      |
| C23      | C24      | C25      | C26      | -178.8 (7)     | C53      | C54      | C55      | C56      | -179.2 (7)     |
| C23      | C24      | C25      | C30      | -0.4 (11)      | C53      | C54      | C55      | C60      | 0.0 (10)       |
| C24      | C25      | C26      | C27      | 177.4 (9)      | C54      | C55      | C56      | C57      | 176.6 (8)      |
| C24      | C25      | C30      | C17      | 2.3 (9)        | C54      | C55      | C60      | C47      | 1.9 (9)        |
| C24      | C25      | C30      | C29      | -177.6 (7)     | C54      | C55      | C60      | C59      | -177.7 (6)     |
| C25      | C26      | C27      | C28      | 0.0 (16)       | C55      | C56      | C57      | C58      | 1.2 (14)       |
| C26      | C25      | C30      | C17      | -179.2 (6)     | C56      | C55      | C60      | C47      | -178.8 (6)     |
| C26      | C25      | C30      | C29      | 0.9 (10)       | C56      | C55      | C60      | C59      | 1.5 (9)        |
| C26      | C27      | C28      | C29      | 1.2 (16)       | C56      | C57      | C58      | C59      | 1.5 (15)       |
| C27      | C28      | C29      | C30      | -1.3 (15)      | C57      | C58      | C59      | C60      | -2.6 (14)      |
| C28      | C29      | C30      | C17      | -179.6 (8)     | C58      | C59      | C60      | C47      | -178.6 (7)     |
| C28      | C29      | C30      | C25      | 0.3 (12)       | C58      | C59      | C60      | C55      | 1.0 (11)       |
| C30      | C17      | C18      | C19      | 178.2 (6)      | C60      | C47      | C48      | C49      | 176.9 (6)      |
| C30      | C17      | C18      | C23      | -1.3 (9)       | C60      | C47      | C48      | C53      | -1.9 (8)       |
| C30      | C25      | C26      | C27      | -1.1 (13)      | C60      | C55      | C56      | C57      | -2.7 (11)      |
